# Supplementary material for: Detrital Zircon Geochronology and Tectonic Evolution Implication of the Middle Jurassic Zhiluo Formation, Southern Ordos Basin, China
Source: MDPI journal article supplement (doi:10.3390/min13010045), 2022-12-27
Supplement: s1 [file s1]

**Table S1.** Chemical composition of zircon trace elements (in ppm) in the lower part of the Zhiluo Formation sandstone (Sample YS-01) in the Yongshou area

| Number  | SiO2   | Ti      | Y        | ZrO2   | Nb      | La      | Ce      | Pr      | Nd      | Sm      | Eu      | Gd      | Tb      | Dy      | Ho      | Er      | Tm      | Lu      | Hf        | Ta      | Pb      | Pb       | Pb      | Pb      | Pb      | Th       | U        |
|---------|--------|---------|----------|--------|---------|---------|---------|---------|---------|---------|---------|---------|---------|---------|---------|---------|---------|---------|-----------|---------|---------|----------|---------|---------|---------|----------|----------|
|         | wt%    | ppm     | ppm      | wt%    | ppm       | ppm     | ppm     | ppm      | ppm     | ppm     | ppm     | ppm      | ppm      |
| SRM 610 | 70.009 | 434.000 | 450.000  | 0.059  | 419.000 | 457.000 | 448.000 | 430.000 | 431.000 | 451.000 | 461.000 | 444.000 | 443.000 | 427.000 | 449.000 | 426.000 | 420.000 | 435.000 | 432.000   | 452.000 | 426.000 | 426.000  | 426.000 | 426.000 | 426.000 | 457.200  | 461.500  |
| GJ-1std | 32.747 | 2.518   | 249.003  | 66.730 | 1.406   | 0.012   | 13.090  | 0.012   | 0.462   | 1.347   | 0.932   | 6.454   | 1.778   | 18.789  | 6.719   | 29.522  | 6.362   | 13.128  | 6869.181  | 0.317   | 0.000   | 156.867  | 10.211  | 0.451   | 40.298  | 6.406    | 385.387  |
| GJ-1std | 32.747 | 4.679   | 247.315  | 66.448 | 1.439   | 0.010   | 13.025  | 0.030   | 0.494   | 1.096   | 0.877   | 6.182   | 1.723   | 19.033  | 6.633   | 28.492  | 6.179   | 12.828  | 6786.035  | 0.321   | 0.378   | 156.349  | 10.478  | 0.422   | 40.222  | 6.424    | 385.719  |
| Ple     | 32.731 | 44.859  | 233.625  | 63.270 | 2.120   | 0.000   | 1.199   | 0.044   | 0.633   | 1.359   | 0.308   | 5.740   | 2.104   | 24.053  | 6.980   | 24.769  | 4.253   | 4.496   | 10137.678 | 1.192   | 0.000   | 84.805   | 5.062   | 1.059   | 22.112  | 30.633   | 385.795  |
| 91500   | 32.659 | 3.941   | 120.343  | 68.644 | 0.638   | 0.009   | 2.318   | 0.018   | 0.288   | 0.383   | 0.222   | 1.941   | 0.736   | 9.302   | 3.910   | 20.805  | 5.134   | 11.538  | 5457.352  | 0.353   | 0.891   | 51.931   | 4.354   | 2.606   | 14.856  | 24.290   | 71.659   |
| 028-1   | 32.731 | 5.492   | 1111.962 | 65.621 | 7.356   | 0.314   | 20.767  | 0.583   | 5.851   | 6.025   | 1.753   | 18.262  | 5.937   | 78.665  | 34.313  | 181.786 | 43.821  | 105.671 | 9752.933  | 2.893   | 3.773   | 516.645  | 67.044  | 27.126  | 153.595 | 235.823  | 731.420  |
| 028-2   | 32.731 | 5.778   | 1556.350 | 65.525 | 3.526   | 0.036   | 74.985  | 0.403   | 6.556   | 9.859   | 4.213   | 40.940  | 12.723  | 141.024 | 51.929  | 228.294 | 47.884  | 89.347  | 7144.687  | 1.223   | 0.000   | 44.975   | 2.542   | 11.032  | 17.181  | 438.715  | 268.353  |
| 028-3   | 32.731 | 6.106   | 1013.828 | 65.259 | 6.993   | 3.599   | 58.954  | 1.017   | 5.391   | 4.571   | 0.938   | 21.453  | 7.185   | 88.528  | 33.752  | 153.382 | 32.896  | 61.252  | 8385.318  | 2.548   | 0.000   | 51.853   | 2.878   | 3.964   | 15.210  | 176.844  | 363.384  |
| 028-4   | 32.731 | 7.659   | 2477.330 | 66.359 | 9.283   | 1.834   | 107.362 | 0.925   | 10.052  | 14.140  | 2.182   | 68.784  | 22.094  | 247.055 | 86.768  | 364.601 | 71.169  | 116.920 | 8471.181  | 2.358   | 0.000   | 79.415   | 4.487   | 11.668  | 26.245  | 543.229  | 555.453  |
| 028-5   | 32.731 | 16.405  | 1953.200 | 67.129 | 1.655   | 0.109   | 68.475  | 0.856   | 13.260  | 17.403  | 1.971   | 71.895  | 19.479  | 204.480 | 69.969  | 286.004 | 53.572  | 90.626  | 7369.349  | 0.442   | 9.371   | 22.121   | 2.013   | 11.589  | 11.980  | 145.152  | 40.891   |
| 028-6   | 32.731 | 4.993   | 1164.252 | 64.574 | 2.533   | 0.927   | 74.045  | 3.122   | 25.934  | 29.337  | 10.111  | 60.844  | 16.759  | 145.255 | 38.732  | 145.919 | 27.970  | 47.823  | 8692.808  | 0.385   | 3.004   | 222.461  | 14.188  | 38.001  | 76.703  | 1014.975 | 775.724  |
| 028-7   | 32.731 | 8.395   | 907.053  | 65.843 | 5.707   | 58.175  | 148.082 | 16.436  | 68.705  | 15.440  | 0.361   | 27.512  | 7.512   | 83.824  | 31.085  | 137.749 | 28.631  | 50.886  | 10433.387 | 2.440   | 0.736   | 245.256  | 29.119  | 21.411  | 76.771  | 129.748  | 204.045  |
| 028-8   | 32.731 | 12.828  | 446.822  | 66.393 | 0.764   | 0.004   | 15.356  | 0.053   | 0.780   | 1.729   | 0.437   | 10.121  | 3.198   | 37.577  | 14.126  | 64.411  | 14.533  | 30.255  | 8803.965  | 0.449   | 0.902   | 42.812   | 2.681   | 5.054   | 13.571  | 118.784  | 150.324  |
| 028-9   | 32.731 | 6.107   | 1897.844 | 64.297 | 3.879   | 1.757   | 25.590  | 3.200   | 29.203  | 36.366  | 11.875  | 81.480  | 24.310  | 221.216 | 65.323  | 264.084 | 54.868  | 97.520  | 11184.349 | 3.863   | 10.715  | 1014.494 | 92.345  | 62.836  | 297.978 | 572.829  | 1470.792 |
| 028-10  | 32.731 | 11.555  | 802.118  | 66.259 | 2.994   | 0.044   | 19.019  | 0.118   | 1.448   | 3.118   | 0.267   | 16.864  | 5.743   | 70.081  | 27.185  | 121.119 | 25.240  | 43.230  | 9885.740  | 1.459   | 0.750   | 469.744  | 68.263  | 32.395  | 145.280 | 186.255  | 365.359  |
| SRM 610 | 70.009 | 434.000 | 450.000  | 0.059  | 419.000 | 457.000 | 448.000 | 430.000 | 431.000 | 451.000 | 461.000 | 444.000 | 443.000 | 427.000 | 449.000 | 426.000 | 420.000 | 435.000 | 432.000   | 452.000 | 426.000 | 426.000  | 426.000 | 426.000 | 426.000 | 457.200  | 461.500  |
| GJ-1std | 32.747 | 3.237   | 247.546  | 66.319 | 1.430   | 0.006   | 12.781  | 0.028   | 0.371   | 1.172   | 0.842   | 6.243   | 1.829   | 18.914  | 6.512   | 28.432  | 6.252   | 12.970  | 6901.624  | 0.358   | 1.603   | 153.720  | 10.527  | 0.392   | 39.601  | 6.429    | 382.311  |
| GJ-1std | 32.747 | 4.078   | 247.352  | 66.641 | 1.334   | 0.009   | 12.937  | 0.008   | 0.544   | 1.107   | 0.767   | 5.727   | 1.849   | 18.404  | 6.713   | 28.729  | 6.181   | 12.848  | 6899.618  | 0.356   | 3.890   | 155.648  | 10.273  | 0.409   | 40.050  | 6.543    | 382.893  |
| Ple     | 32.731 | 45.611  | 240.790  | 64.910 | 2.164   | 0.006   | 1.305   | 0.056   | 0.654   | 1.241   | 0.432   | 5.585   | 2.294   | 24.569  | 7.169   | 26.005  | 4.438   | 4.562   | 10565.560 | 1.229   | 1.461   | 87.451   | 5.244   | 1.089   | 22.826  | 31.713   | 394.721  |
| 91500   | 32.659 | 4.601   | 121.405  | 68.365 | 0.705   | 0.011   | 2.382   | 0.002   | 0.200   | 0.317   | 0.239   | 2.480   | 0.765   | 9.781   | 3.969   | 21.215  | 5.378   | 11.825  | 5510.283  | 0.384   | 0.000   | 54.097   | 4.454   | 2.605   | 15.387  | 24.794   | 72.500   |
| 028-11  | 32.731 | 4.346   | 191.753  | 66.372 | 2.829   | 0.019   | 2.385   | 0.006   | 0.085   | 0.497   | 0.108   | 3.070   | 1.185   | 14.802  | 5.811   | 26.967  | 5.545   | 10.953  | 10940.457 | 0.634   | 1.038   | 435.206  | 56.983  | 2.328   | 118.712 | 12.194   | 334.106  |
| 028-12  | 32.731 | 3.312   | 407.176  | 66.644 | 1.551   | 0.012   | 34.366  | 0.050   | 0.845   | 1.568   | 0.767   | 8.941   | 2.768   | 31.158  | 11.896  | 58.530  | 13.732  | 33.880  | 8876.827  | 0.499   | 1.665   | 149.126  | 9.184   | 13.595  | 45.116  | 323.868  | 509.755  |
| 028-13  | 32.731 | 4.325   | 646.096  | 66.379 | 0.786   | 1.010   | 12.421  | 0.481   | 3.564   | 3.217   | 0.665   | 14.323  | 4.477   | 51.882  | 20.400  | 100.024 | 22.988  | 52.216  | 10814.558 | 0.395   | 3.655   | 506.749  | 79.935  | 37.371  | 159.426 | 166.448  | 312.113  |
| 028-14  | 32.731 | 3.615   | 1030.469 | 67.092 | 3.640   | 0.018   | 18.572  | 0.105   | 1.550   | 4.221   | 0.551   | 21.166  | 7.276   | 86.551  | 34.503  | 162.816 | 35.272  | 69.905  | 8435.512  | 1.163   | 3.322   | 644.515  | 103.716 | 34.098  | 196.163 | 151.834  | 388.392  |
| 028-15  | 32.731 | 9.580   | 1038.344 | 66.149 | 3.346   | 0.103   | 23.422  | 0.106   | 1.328   | 2.553   | 0.387   | 14.754  | 5.687   | 75.074  | 32.073  | 165.045 | 39.537  | 90.503  | 10772.502 | 1.491   | 0.000   | 727.766  | 107.219 | 48.947  | 224.735 | 336.778  | 685.125  |
| 028-16  | 32.731 | 130.669 | 791.124  | 64.461 | 9.352   | 0.042   | 16.656  | 0.106   | 1.188   | 2.628   | 0.184   | 14.193  | 5.086   | 63.927  | 26.604  | 127.759 | 28.178  | 56.346  | 9733.277  | 2.931   | 0.000   | 536.273  | 83.911  | 31.354  | 164.216 | 161.892  | 408.518  |
| 028-17  | 32.731 | 12.448  | 1026.291 | 66.349 | 4.851   | 0.674   | 17.532  | 1.060   | 8.889   | 9.247   | 1.819   | 30.003  | 8.664   | 91.826  | 33.571  | 149.446 | 32.290  | 64.841  | 9124.243  | 2.338   | 0.000   | 175.315  | 9.795   | 8.087   | 48.654  | 387.425  | 1278.119 |
| 028-18  | 32.731 | 7.125   | 404.148  | 66.763 | 0.860   | 0.049   | 13.941  | 0.045   | 0.608   | 1.522   | 0.369   | 7.100   | 2.501   | 31.802  | 12.595  | 62.638  | 14.513  | 32.430  | 9177.159  | 0.503   | 3.640   | 55.585   | 3.596   | 5.471   | 17.108  | 128.471  | 197.142  |
| 028-19  | 32.731 | 19.851  | 3003.660 | 64.294 | 23.129  | 42.034  | 199.309 | 17.975  | 93.272  | 61.160  | 18.215  | 125.125 | 38.688  | 369.332 | 106.352 | 433.214 | 92.410  | 174.165 | 11567.714 | 4.958   | 49.369  | 232.209  | 56.992  | 61.649  | 101.553 | 868.711  | 1442.748 |
| 028-20  | 32.731 | 1.948   | 849.606  | 68.754 | 12.711  | 0.160   | 34.117  | 0.121   | 1.293   | 1.639   | 0.306   | 9.077   | 4.220   | 61.106  | 26.239  | 136.964 | 32.748  | 72.605  | 12529.282 | 3.133   | 0.000   | 90.222   | 7.540   | 6.943   | 27.048  | 244.922  | 673.449  |
| SRM 610 | 70.009 | 434.000 | 450.000  | 0.059  | 419.000 | 457.000 | 448.000 | 430.000 | 431.000 | 451.000 | 461.000 | 444.000 | 443.000 | 427.000 | 449.000 | 426.000 | 420.000 | 435.000 | 432.000   | 452.000 | 426.000 | 426.000  | 426.000 | 426.000 | 426.000 | 457.200  | 461.500  |
| GJ-1std | 32.747 | 3.890   | 246.290  | 65.582 | 1.341   | 0.000   | 12.729  | 0.029   | 0.352   | 1.207   | 0.855   | 6.003   | 1.852   | 18.409  | 6.619   | 28.725  | 6.206   | 13.088  | 6940.219  | 0.342   | 0.000   | 158.816  | 10.645  | 0.392   | 40.833  | 6.457    | 376.106  |
| GJ-1std | 32.747 | 2.379   | 245.927  | 66.119 | 1.314   | 0.000   | 12.581  | 0.015   | 0.561   | 1.111   | 0.776   | 6.440   | 1.778   | 18.773  | 6.599   | 29.730  | 6.178   | 12.845  | 7019.945  | 0.326   | 1.008   | 160.673  | 10.612  | 0.375   | 41.278  | 6.475    | 377.316  |
| Ple     | 32.731 | 44.057  | 231.825  | 63.907 | 1.941   | 0.015   | 1.185   | 0.062   | 0.575   | 1.373   | 0.380   | 5.526   | 2.212   | 23.925  | 7.015   | 24.702  | 4.257   | 4.535   | 10452.313 | 1.189   | 0.000   | 89.987   | 5.463   | 1.022   | 23.430  | 31.431   | 383.710  |
| 91500   | 32.659 | 5.314   | 120.694  | 66.643 | 0.599   | 0.002   | 2.292   | 0.008   | 0.142   | 0.408   | 0.255   | 1.981   | 0.703   | 9.777   | 4.040   | 21.025  | 5.302   | 11.602  | 5418.266  | 0.410   | 0.790   | 56.072   | 4.736   | 2.846   | 16.062  | 25.482   | 70.711   |
| 028-21  | 32.731 | 9.116   | 457.198  | 66.141 | 0.654   | 0.028   | 12.636  | 0.054   | 0.914   | 1.860   | 0.525   | 9.146   | 3.103   | 36.805  | 14.656  | 69.403  | 16.258  | 35.643  | 9022.666  | 0.418   | 0.582   | 47.482   | 3.040   | 4.755   | 14.615  | 110.519  | 154.197  |
| 028-22  | 32.731 | 6.503   | 1479.590 | 64.835 | 11.077  | 0.004   | 76.339  | 0.130   | 2.192   | 5.038   | 1.041   | 30.298  | 10.744  | 133.397 | 50.436  | 230.506 | 47.272  | 85.664  | 8396.579  | 3.022   | 0.334   | 68.396   | 3.931   | 6.575   | 20.802  | 281.640  | 449.737  |
| 028-23  | 32.731 | 106.683 | 466.018  | 62.864 | 2.611   | 0.168   | 6.811   | 0.127   | 1.555   | 1.829   | 0.144   | 10.877  | 3.695   | 41.970  | 15.967  | 71.193  | 14.500  | 27.275  | 8422.610  | 0.596   | 2.858   | 38.619   | 4.892   | 4.172   | 12.614  | 20.703   | 29.725   |

|         |        |         |          |        |         |         |         |         |         |         |         |         |         |         |         |         |         |         |           |         |         |         |         |         |         |         |          |
|---------|--------|---------|----------|--------|---------|---------|---------|---------|---------|---------|---------|---------|---------|---------|---------|---------|---------|---------|-----------|---------|---------|---------|---------|---------|---------|---------|----------|
| 028-24  | 32.731 | 4.213   | 708.726  | 65.216 | 3.735   | 0.030   | 60.062  | 0.152   | 2.230   | 3.817   | 1.416   | 16.201  | 5.032   | 56.729  | 21.762  | 102.654 | 23.093  | 51.265  | 8826.183  | 1.191   | 0.000   | 242.518 | 15.508  | 26.492  | 75.756  | 584.484 | 758.949  |
| 028-25  | 32.731 | 7.111   | 646.659  | 65.712 | 3.000   | 0.022   | 37.743  | 0.074   | 1.464   | 2.622   | 0.954   | 13.337  | 4.403   | 52.189  | 20.659  | 100.939 | 22.458  | 47.256  | 8967.260  | 1.129   | 0.000   | 59.520  | 3.238   | 4.917   | 17.637  | 206.610 | 375.979  |
| SRM 610 | 70.009 | 434.000 | 450.000  | 0.059  | 419.000 | 457.000 | 448.000 | 430.000 | 431.000 | 451.000 | 461.000 | 444.000 | 443.000 | 427.000 | 449.000 | 426.000 | 420.000 | 435.000 | 432.000   | 452.000 | 426.000 | 426.000 | 426.000 | 426.000 | 426.000 | 457.200 | 461.500  |
| GJ-Istd | 32.747 | 3.707   | 251.931  | 66.810 | 1.307   | 0.000   | 12.852  | 0.021   | 0.585   | 1.182   | 0.830   | 5.669   | 1.883   | 19.589  | 6.512   | 28.957  | 6.184   | 13.222  | 7027.120  | 0.308   | 2.054   | 162.626 | 10.839  | 0.415   | 41.834  | 6.291   | 385.402  |
| GJ-Istd | 32.747 | 4.601   | 245.792  | 65.518 | 1.339   | 0.015   | 12.487  | 0.032   | 0.430   | 1.197   | 0.773   | 6.285   | 1.736   | 18.761  | 6.351   | 28.785  | 6.076   | 13.143  | 6963.492  | 0.355   | 3.124   | 161.392 | 10.674  | 0.388   | 41.502  | 6.230   | 378.703  |
| Ple     | 32.731 | 51.615  | 389.361  | 63.739 | 3.221   | 0.042   | 2.027   | 0.119   | 1.539   | 2.528   | 0.700   | 10.277  | 3.806   | 39.743  | 11.319  | 41.340  | 6.993   | 7.337   | 10483.087 | 2.089   | 0.361   | 128.711 | 7.761   | 1.642   | 33.600  | 48.008  | 544.579  |
| 91500   | 32.659 | 4.045   | 123.564  | 65.940 | 0.601   | 0.008   | 2.369   | 0.002   | 0.218   | 0.370   | 0.191   | 2.058   | 0.760   | 9.611   | 4.084   | 21.484  | 5.345   | 11.836  | 5385.046  | 0.409   | 0.369   | 58.268  | 4.907   | 2.823   | 16.611  | 25.459  | 73.094   |
| SRM 610 | 70.009 | 434.000 | 450.000  | 0.059  | 419.000 | 457.000 | 448.000 | 430.000 | 431.000 | 451.000 | 461.000 | 444.000 | 443.000 | 427.000 | 449.000 | 426.000 | 420.000 | 435.000 | 432.000   | 452.000 | 426.000 | 426.000 | 426.000 | 426.000 | 426.000 | 457.200 | 461.500  |
| GJ-Istd | 32.747 | 2.861   | 242.126  | 66.194 | 1.346   | 0.000   | 12.521  | 0.024   | 0.377   | 1.148   | 0.895   | 6.140   | 1.743   | 18.229  | 6.166   | 27.798  | 6.002   | 12.526  | 6864.373  | 0.307   | 1.769   | 148.373 | 9.666   | 0.345   | 38.099  | 6.222   | 367.302  |
| GJ-Istd | 32.747 | 2.993   | 242.549  | 65.442 | 1.277   | 0.001   | 12.465  | 0.037   | 0.361   | 1.076   | 0.886   | 6.098   | 1.722   | 18.288  | 6.507   | 27.518  | 5.947   | 12.633  | 6808.893  | 0.286   | 1.532   | 150.824 | 9.708   | 0.369   | 38.709  | 6.135   | 368.487  |
| Ple     | 32.731 | 70.971  | 473.826  | 63.990 | 3.702   | 0.000   | 1.998   | 0.111   | 1.748   | 2.943   | 0.837   | 11.963  | 4.702   | 50.752  | 14.518  | 49.516  | 8.474   | 8.609   | 9947.552  | 2.209   | 0.000   | 144.794 | 8.211   | 2.003   | 37.760  | 59.951  | 642.953  |
| 91500   | 32.659 | 4.186   | 122.259  | 66.831 | 0.613   | 0.116   | 2.534   | 0.061   | 0.520   | 0.389   | 0.224   | 2.019   | 0.773   | 9.525   | 4.070   | 21.308  | 5.461   | 11.452  | 5343.664  | 0.378   | 0.239   | 50.421  | 4.312   | 2.591   | 14.465  | 24.321  | 70.266   |
| 028-26  | 32.731 | 10.591  | 1078.733 | 65.502 | 4.949   | 0.000   | 73.641  | 0.215   | 3.012   | 5.830   | 1.124   | 28.157  | 8.869   | 99.354  | 36.833  | 160.768 | 33.216  | 63.463  | 7917.416  | 1.542   | 0.000   | 41.485  | 2.154   | 4.686   | 12.929  | 215.047 | 289.148  |
| 028-27  | 32.731 | 3.832   | 795.775  | 65.644 | 6.641   | 0.019   | 14.362  | 0.065   | 0.847   | 2.334   | 0.070   | 13.318  | 5.018   | 64.706  | 27.179  | 128.366 | 27.838  | 51.389  | 11175.905 | 2.818   | 2.147   | 259.508 | 30.701  | 17.261  | 78.401  | 101.853 | 207.713  |
| 028-28  | 32.731 | 6.689   | 1116.844 | 64.834 | 2.652   | 0.608   | 35.223  | 2.106   | 18.124  | 23.028  | 7.512   | 46.461  | 13.610  | 123.233 | 36.343  | 142.227 | 29.636  | 59.747  | 10306.211 | 0.333   | 5.029   | 115.095 | 10.701  | 10.165  | 35.500  | 444.477 | 781.489  |
| 028-29  | 32.731 | 9.027   | 837.272  | 64.245 | 4.233   | 0.231   | 18.874  | 0.203   | 1.428   | 1.697   | 0.382   | 11.309  | 4.343   | 59.673  | 26.442  | 135.761 | 32.850  | 77.802  | 9224.683  | 1.852   | 3.008   | 579.012 | 82.084  | 28.220  | 172.512 | 184.510 | 516.468  |
| 028-30  | 32.731 | 8.948   | 481.062  | 64.995 | 0.826   | 0.012   | 4.173   | 0.064   | 1.373   | 4.077   | 0.213   | 22.963  | 7.085   | 60.633  | 16.602  | 55.566  | 9.136   | 12.245  | 10226.199 | 0.514   | 0.000   | 67.908  | 5.105   | 11.533  | 23.537  | 125.579 | 106.882  |
| 028-31  | 32.731 | 9.542   | 592.000  | 66.464 | 0.772   | 0.021   | 14.932  | 0.078   | 1.319   | 2.582   | 0.877   | 13.116  | 4.159   | 49.393  | 18.930  | 90.057  | 20.436  | 45.156  | 8679.359  | 0.472   | 0.140   | 68.611  | 4.340   | 7.785   | 21.576  | 176.321 | 232.563  |
| 028-32  | 32.731 | 4.725   | 1105.675 | 64.845 | 13.229  | 1.088   | 20.499  | 1.283   | 9.688   | 5.752   | 0.325   | 25.623  | 7.164   | 90.986  | 37.195  | 178.276 | 40.041  | 76.884  | 10763.648 | 4.238   | 1.102   | 395.648 | 46.901  | 39.147  | 126.245 | 227.798 | 315.527  |
| 028-33  | 32.731 | 12.048  | 1619.125 | 63.523 | 3.008   | 6.304   | 113.777 | 11.268  | 80.729  | 75.835  | 23.981  | 145.599 | 40.712  | 358.792 | 98.122  | 370.357 | 74.125  | 129.596 | 9737.593  | 0.879   | 2.035   | 297.564 | 19.784  | 29.160  | 91.393  | 883.403 | 1068.831 |
| 028-34  | 32.731 | 19.719  | 1008.526 | 65.665 | 1.420   | 0.081   | 8.180   | 0.546   | 7.744   | 9.409   | 0.981   | 35.609  | 10.027  | 107.253 | 36.313  | 148.462 | 28.498  | 47.090  | 8016.053  | 0.446   | 6.328   | 52.412  | 7.021   | 7.955   | 18.440  | 38.380  | 45.744   |
| 028-35  | 32.731 | 4.069   | 817.000  | 64.003 | 2.082   | 0.460   | 36.472  | 0.144   | 1.406   | 2.975   | 0.710   | 14.114  | 5.294   | 64.883  | 26.356  | 125.296 | 29.432  | 63.535  | 10006.899 | 1.145   | 0.000   | 187.555 | 11.414  | 21.984  | 59.243  | 491.949 | 622.083  |
| SRM 610 | 70.009 | 434.000 | 450.000  | 0.059  | 419.000 | 457.000 | 448.000 | 430.000 | 431.000 | 451.000 | 461.000 | 444.000 | 443.000 | 427.000 | 449.000 | 426.000 | 420.000 | 435.000 | 432.000   | 452.000 | 426.000 | 426.000 | 426.000 | 426.000 | 426.000 | 457.200 | 461.500  |
| GJ-Istd | 32.747 | 2.401   | 242.572  | 66.299 | 1.279   | 0.009   | 12.786  | 0.022   | 0.506   | 1.281   | 0.890   | 5.498   | 1.752   | 18.876  | 6.647   | 28.256  | 6.268   | 12.988  | 6974.936  | 0.342   | 2.593   | 155.629 | 10.188  | 0.403   | 40.006  | 6.393   | 380.324  |
| GJ-Istd | 32.747 | 2.241   | 244.013  | 65.929 | 1.358   | 0.007   | 12.689  | 0.021   | 0.338   | 1.215   | 0.917   | 6.562   | 1.854   | 19.161  | 6.803   | 29.496  | 6.242   | 13.044  | 6939.850  | 0.324   | 0.075   | 158.527 | 10.479  | 0.608   | 40.841  | 6.558   | 390.757  |
| Ple     | 32.731 | 68.936  | 455.727  | 64.260 | 3.564   | 0.027   | 1.885   | 0.119   | 1.732   | 3.291   | 0.828   | 12.411  | 4.704   | 50.679  | 14.347  | 50.536  | 8.642   | 8.698   | 10250.751 | 2.261   | 0.036   | 150.920 | 8.968   | 2.115   | 39.463  | 61.706  | 667.136  |
| 91500   | 32.659 | 3.818   | 114.666  | 64.971 | 0.582   | 0.093   | 2.358   | 0.009   | 0.222   | 0.314   | 0.211   | 1.861   | 0.757   | 9.185   | 4.014   | 21.138  | 5.410   | 11.636  | 5385.341  | 0.387   | 3.360   | 56.232  | 4.505   | 2.750   | 16.035  | 26.679  | 74.876   |
| 028-36  | 32.731 | 8.666   | 1268.682 | 65.889 | 6.750   | 12.540  | 56.913  | 3.852   | 14.971  | 7.715   | 1.085   | 30.880  | 10.304  | 121.350 | 46.496  | 210.661 | 44.878  | 86.320  | 8824.651  | 2.540   | 0.000   | 65.980  | 3.807   | 5.008   | 19.367  | 230.242 | 458.996  |
| 028-37  | 32.731 | 3.925   | 422.879  | 65.274 | 1.022   | 0.028   | 14.856  | 0.041   | 0.492   | 1.280   | 0.377   | 7.082   | 2.626   | 33.804  | 14.068  | 71.707  | 17.346  | 39.128  | 10895.313 | 0.702   | 0.756   | 77.406  | 5.172   | 6.880   | 23.414  | 161.460 | 270.044  |
| 028-38  | 32.731 | 5.302   | 1429.222 | 64.343 | 4.728   | 0.122   | 71.165  | 0.441   | 3.723   | 6.114   | 1.915   | 27.777  | 9.826   | 122.703 | 50.165  | 243.485 | 55.233  | 115.784 | 9947.141  | 1.817   | 2.654   | 287.520 | 17.715  | 37.679  | 92.989  | 914.316 | 1020.902 |
| 028-39  | 32.731 | 6.739   | 385.113  | 64.164 | 0.451   | 0.000   | 10.192  | 0.039   | 0.628   | 1.656   | 0.535   | 8.137   | 2.856   | 33.536  | 13.520  | 64.653  | 14.623  | 33.509  | 9454.874  | 0.380   | 2.295   | 51.382  | 3.127   | 5.022   | 15.738  | 120.999 | 183.331  |
| 028-40  | 32.731 | 4.433   | 706.129  | 63.931 | 0.712   | 11.344  | 37.633  | 3.166   | 14.422  | 4.430   | 0.668   | 15.950  | 5.164   | 62.698  | 25.456  | 119.530 | 25.473  | 50.638  | 9813.382  | 0.557   | 1.462   | 385.695 | 80.926  | 27.041  | 125.027 | 100.537 | 182.443  |
| 028-41  | 32.731 | 7.806   | 542.556  | 63.842 | 1.853   | 0.003   | 19.164  | 0.109   | 2.062   | 3.522   | 0.291   | 16.217  | 5.088   | 57.868  | 21.301  | 90.591  | 17.847  | 31.349  | 9737.420  | 0.678   | 0.000   | 135.374 | 20.863  | 18.713  | 47.042  | 97.506  | 94.709   |
| 028-42  | 32.731 | 19.712  | 1002.682 | 63.717 | 4.317   | 1.035   | 57.972  | 0.585   | 5.332   | 6.904   | 1.843   | 29.736  | 9.978   | 110.020 | 39.595  | 167.979 | 33.703  | 58.774  | 8688.257  | 1.275   | 10.463  | 41.672  | 7.989   | 9.903   | 17.144  | 210.740 | 263.445  |
| 028-43  | 32.731 | 17.318  | 374.239  | 63.724 | 0.568   | 0.003   | 15.452  | 0.050   | 0.869   | 2.022   | 0.496   | 10.027  | 3.187   | 36.978  | 14.045  | 63.588  | 14.013  | 28.732  | 8909.468  | 0.351   | 4.010   | 48.788  | 2.966   | 6.141   | 15.687  | 156.941 | 182.928  |
| 028-44  | 32.731 | 237.480 | 596.199  | 62.161 | 2.197   | 0.212   | 16.594  | 0.129   | 1.616   | 2.461   | 0.733   | 12.141  | 4.006   | 51.961  | 21.898  | 109.899 | 25.464  | 60.899  | 8741.777  | 0.726   | 14.071  | 105.416 | 20.059  | 23.798  | 42.505  | 221.780 | 343.416  |
| 028-45  | 32.731 | 3.440   | 978.721  | 61.791 | 6.938   | 0.340   | 23.647  | 0.170   | 2.021   | 3.778   | 0.351   | 20.004  | 7.304   | 91.251  | 37.849  | 178.704 | 39.003  | 74.123  | 11061.373 | 2.580   | 2.678   | 868.494 | 133.458 | 51.740  | 265.951 | 358.512 | 815.148  |
| SRM 610 | 70.009 | 434.000 | 450.000  | 0.059  | 419.000 | 457.000 | 448.000 | 430.000 | 431.000 | 451.000 | 461.000 | 444.000 | 443.000 | 427.000 | 449.000 | 426.000 | 420.000 | 435.000 | 432.000   | 452.000 | 426.000 | 426.000 | 426.000 | 426.000 | 426.000 | 457.200 | 461.500  |
| GJ-Istd | 32.747 | 3.757   | 252.090  | 68.718 | 1.288   | 0.011   | 13.442  | 0.016   | 0.433   | 1.330   | 0.889   | 6.730   | 1.907   | 20.210  | 7.173   | 31.653  | 6.581   | 14.272  | 7927.162  | 0.397   | 1.701   | 176.677 | 11.821  | 0.417   | 45.434  | 7.848   | 454.040  |
| GJ-I    | 32.747 | 4.259   | 256.922  | 68.800 | 1.411   | 0.000   | 14.480  | 0.018   | 0.500   | 1.279   | 1.005   | 7.481   | 2.099   | 22.740  | 7.989   | 34.235  | 7.480   | 15.776  | 8413.911  | 0.446   | 4.400   | 206.151 | 13.843  | 0.625   | 53.131  | 8.999   | 481.380  |
| Ple     | 32.731 | 72.063  |          |        |         |         |         |         |         |         |         |         |         |         |         |         |         |         |           |         |         |         |         |         |         |         |          |

|         |        |         |           |        |         |         |         |         |         |         |         |         |         |          |         |          |         |         |           |         |         |         |         |         |         |          |          |
|---------|--------|---------|-----------|--------|---------|---------|---------|---------|---------|---------|---------|---------|---------|----------|---------|----------|---------|---------|-----------|---------|---------|---------|---------|---------|---------|----------|----------|
| 91500   | 32.659 | 3.701   | 120.139   | 68.612 | 0.630   | 0.000   | 2.871   | 0.019   | 0.219   | 0.372   | 0.214   | 2.280   | 0.832   | 10.746   | 4.438   | 23.786   | 5.944   | 13.369  | 6412.523  | 0.507   | 0.079   | 69.690  | 5.888   | 3.540   | 19.952  | 37.095   | 100.910  |
| SRM 610 | 70.009 | 434.000 | 450.000   | 0.059  | 419.000 | 457.000 | 448.000 | 430.000 | 431.000 | 451.000 | 461.000 | 444.000 | 443.000 | 427.000  | 449.000 | 426.000  | 420.000 | 435.000 | 432.000   | 452.000 | 426.000 | 426.000 | 426.000 | 426.000 | 426.000 | 457.200  | 461.500  |
| GJ-1std | 32.747 | 3.323   | 238.279   | 67.065 | 1.286   | 0.007   | 12.467  | 0.007   | 0.470   | 1.276   | 0.755   | 6.119   | 1.737   | 17.893   | 6.386   | 28.570   | 5.979   | 12.490  | 6769.933  | 0.301   | 2.654   | 151.882 | 10.043  | 0.367   | 39.053  | 6.029    | 364.796  |
| GJ-1std | 32.747 | 3.264   | 236.510   | 67.320 | 1.261   | 0.000   | 12.374  | 0.013   | 0.456   | 1.240   | 0.788   | 5.576   | 1.750   | 18.247   | 6.261   | 28.137   | 5.890   | 12.358  | 6822.362  | 0.294   | 0.454   | 148.217 | 10.013  | 0.390   | 38.144  | 5.988    | 357.177  |
| Ple     | 32.731 | 73.278  | 471.640   | 66.592 | 3.750   | 0.030   | 1.960   | 0.121   | 1.546   | 2.864   | 0.847   | 13.181  | 4.885   | 50.379   | 14.204  | 49.899   | 8.428   | 8.413   | 10019.605 | 2.133   | 3.027   | 146.394 | 8.405   | 2.072   | 38.267  | 59.647   | 643.709  |
| 91500   | 32.659 | 4.355   | 115.046   | 66.111 | 0.548   | 0.000   | 2.172   | 0.011   | 0.143   | 0.424   | 0.168   | 1.800   | 0.708   | 8.964    | 3.902   | 20.221   | 5.149   | 10.999  | 5126.705  | 0.379   | 0.000   | 52.016  | 4.236   | 2.578   | 14.823  | 23.607   | 68.775   |
| 028-46  | 32.731 | 8.962   | 145.026   | 65.740 | 0.601   | 0.000   | 0.969   | 0.067   | 1.354   | 3.930   | 0.145   | 17.336  | 3.412   | 21.332   | 4.605   | 14.279   | 2.301   | 2.952   | 10101.355 | 0.295   | 0.000   | 365.704 | 45.917  | 8.889   | 102.940 | 45.235   | 255.587  |
| 028-47  | 32.731 | 8.918   | 2655.728  | 65.449 | 9.866   | 0.185   | 127.039 | 0.959   | 13.828  | 22.707  | 4.944   | 102.773 | 32.124  | 342.456  | 112.916 | 456.056  | 85.364  | 131.414 | 7790.755  | 2.358   | 9.652   | 89.471  | 7.575   | 17.455  | 32.518  | 795.257  | 608.722  |
| 028-48  | 32.731 | 10.365  | 737.513   | 66.396 | 2.386   | 0.000   | 39.269  | 0.098   | 1.734   | 3.370   | 0.937   | 17.957  | 6.007   | 67.436   | 24.975  | 111.602  | 23.540  | 44.980  | 7653.517  | 1.063   | 0.000   | 24.679  | 1.464   | 2.471   | 7.566   | 111.815  | 172.406  |
| 028-49  | 32.731 | 4.156   | 1219.522  | 65.136 | 6.038   | 0.000   | 20.324  | 0.057   | 1.489   | 3.808   | 0.151   | 24.270  | 8.818   | 111.465  | 43.489  | 194.067  | 39.445  | 67.349  | 7912.527  | 2.063   | 0.000   | 288.246 | 31.738  | 23.293  | 88.687  | 138.113  | 237.128  |
| 028-50  | 32.731 | 7.599   | 711.397   | 65.299 | 1.146   | 0.015   | 22.846  | 0.066   | 1.614   | 2.888   | 0.858   | 14.729  | 4.738   | 56.803   | 22.883  | 108.798  | 24.549  | 53.446  | 8405.078  | 0.638   | 1.276   | 106.475 | 6.645   | 13.955  | 34.459  | 317.760  | 361.327  |
| 028-51  | 32.731 | 4.070   | 2118.719  | 64.576 | 5.104   | 0.004   | 17.987  | 0.196   | 3.710   | 7.662   | 0.189   | 43.599  | 15.773  | 194.651  | 75.231  | 336.888  | 68.598  | 112.635 | 10126.732 | 2.158   | 0.000   | 497.745 | 60.186  | 43.420  | 156.010 | 236.995  | 378.595  |
| 028-52  | 32.731 | 9.139   | 544.275   | 65.059 | 0.984   | 0.012   | 16.917  | 0.062   | 0.984   | 2.222   | 0.569   | 12.227  | 3.889   | 45.219   | 17.165  | 82.227   | 18.294  | 40.404  | 8732.088  | 0.589   | 0.440   | 65.466  | 4.203   | 7.071   | 20.418  | 161.498  | 220.466  |
| 028-53  | 32.731 | 6.383   | 615.738   | 66.328 | 0.698   | 0.000   | 5.565   | 0.017   | 0.369   | 1.141   | 0.195   | 8.565   | 3.398   | 47.872   | 20.337  | 99.765   | 22.216  | 46.574  | 9358.853  | 0.428   | 0.000   | 19.868  | 1.201   | 1.582   | 5.883   | 36.725   | 64.019   |
| 028-54  | 32.731 | 4.212   | 593.640   | 65.455 | 0.719   | 3.382   | 17.945  | 0.899   | 5.203   | 2.866   | 0.587   | 12.600  | 3.812   | 45.154   | 18.387  | 92.718   | 21.955  | 54.219  | 9531.751  | 0.489   | 3.959   | 536.122 | 85.030  | 39.448  | 168.723 | 168.964  | 313.578  |
| 028-55  | 32.731 | 5.640   | 659.866   | 65.845 | 2.197   | 0.020   | 20.561  | 0.099   | 1.491   | 2.721   | 0.392   | 14.303  | 5.019   | 58.939   | 22.720  | 101.979  | 20.987  | 37.123  | 9523.869  | 0.959   | 0.093   | 276.700 | 40.723  | 27.194  | 89.935  | 128.215  | 176.758  |
| SRM 610 | 70.009 | 434.000 | 450.000   | 0.059  | 419.000 | 457.000 | 448.000 | 430.000 | 431.000 | 451.000 | 461.000 | 444.000 | 443.000 | 427.000  | 449.000 | 426.000  | 420.000 | 435.000 | 432.000   | 452.000 | 426.000 | 426.000 | 426.000 | 426.000 | 426.000 | 457.200  | 461.500  |
| GJ-1std | 32.747 | 3.245   | 231.725   | 65.799 | 1.239   | 0.000   | 12.370  | 0.022   | 0.353   | 1.115   | 0.794   | 5.664   | 1.735   | 17.626   | 6.169   | 26.825   | 5.903   | 12.239  | 6649.184  | 0.309   | 0.000   | 148.557 | 9.698   | 0.356   | 38.132  | 5.938    | 354.902  |
| GJ-1std | 32.747 | 3.242   | 231.302   | 65.658 | 1.295   | 0.012   | 12.270  | 0.020   | 0.366   | 0.969   | 0.801   | 5.749   | 1.623   | 17.706   | 6.084   | 27.376   | 5.797   | 11.990  | 6617.681  | 0.326   | 2.818   | 148.961 | 9.819   | 0.425   | 38.332  | 5.848    | 351.769  |
| Ple     | 32.731 | 69.593  | 442.604   | 64.693 | 3.563   | 0.020   | 1.903   | 0.132   | 1.568   | 3.095   | 0.797   | 11.819  | 4.547   | 47.432   | 13.310  | 47.215   | 8.157   | 8.020   | 9836.402  | 2.171   | 2.339   | 140.754 | 8.060   | 1.988   | 36.777  | 54.783   | 602.704  |
| 91500   | 32.659 | 4.725   | 115.356   | 65.719 | 0.595   | 0.000   | 2.238   | 0.002   | 0.162   | 0.373   | 0.172   | 1.709   | 0.662   | 9.070    | 3.766   | 19.931   | 4.853   | 10.913  | 5045.893  | 0.379   | 0.000   | 50.677  | 4.254   | 2.603   | 14.517  | 22.880   | 65.508   |
| 028-56  | 32.731 | 5.862   | 1113.339  | 63.288 | 4.462   | 0.242   | 11.443  | 0.334   | 2.754   | 4.074   | 0.801   | 19.888  | 7.241   | 92.650   | 37.690  | 177.972  | 38.972  | 76.230  | 9218.347  | 1.622   | 4.171   | 596.295 | 83.218  | 36.495  | 181.280 | 265.670  | 614.989  |
| 028-57  | 32.731 | 7.067   | 955.215   | 64.894 | 3.717   | 0.000   | 9.417   | 0.052   | 0.914   | 2.193   | 0.391   | 16.157  | 5.764   | 76.015   | 31.431  | 151.991  | 33.625  | 67.925  | 9527.057  | 1.400   | 0.000   | 734.554 | 101.588 | 48.629  | 224.960 | 356.823  | 735.687  |
| 028-58  | 32.731 | 6.844   | 1395.014  | 69.340 | 9.970   | 1.787   | 23.765  | 1.747   | 11.369  | 9.183   | 1.343   | 28.637  | 10.459  | 125.268  | 48.399  | 229.496  | 50.240  | 91.154  | 12087.955 | 3.626   | 4.472   | 427.667 | 51.661  | 37.024  | 133.948 | 221.149  | 518.752  |
| 028-59  | 32.731 | 11.758  | 838.394   | 69.473 | 1.638   | 0.038   | 11.037  | 0.049   | 1.012   | 2.715   | 0.302   | 17.383  | 6.168   | 76.067   | 28.839  | 128.021  | 26.785  | 47.539  | 10353.424 | 0.816   | 0.000   | 148.908 | 16.346  | 19.459  | 49.696  | 119.016  | 126.283  |
| 028-60  | 32.731 | 22.104  | 962.724   | 69.768 | 0.994   | 0.140   | 6.849   | 0.377   | 6.286   | 8.422   | 0.930   | 32.208  | 9.428   | 99.478   | 34.735  | 141.830  | 27.638  | 46.266  | 8359.878  | 0.390   | 2.129   | 39.242  | 4.548   | 5.623   | 13.439  | 31.446   | 29.422   |
| 028-61  | 32.731 | 11.993  | 728.083   | 68.812 | 2.833   | 0.000   | 16.374  | 0.110   | 1.786   | 3.662   | 0.163   | 17.848  | 5.827   | 68.386   | 25.420  | 110.683  | 22.826  | 39.106  | 10520.928 | 1.019   | 0.000   | 112.305 | 13.575  | 11.980  | 36.343  | 67.566   | 86.480   |
| 028-62  | 32.731 | 4.559   | 400.256   | 68.140 | 3.177   | 0.014   | 14.685  | 0.040   | 0.485   | 0.867   | 0.165   | 5.032   | 1.969   | 28.323   | 12.194  | 66.019   | 16.413  | 39.677  | 11558.128 | 2.360   | 3.815   | 205.315 | 21.836  | 22.297  | 66.044  | 144.199  | 185.132  |
| 028-63  | 32.731 | 11.008  | 1152.490  | 66.597 | 5.695   | 2.279   | 25.523  | 2.108   | 23.233  | 12.774  | 6.383   | 25.586  | 6.321   | 81.282   | 35.831  | 183.198  | 44.099  | 103.362 | 9904.947  | 2.294   | 17.695  | 537.636 | 62.890  | 23.815  | 156.196 | 166.840  | 969.274  |
| 028-64  | 32.731 | 3.935   | 544.118   | 66.393 | 1.519   | 0.015   | 40.916  | 0.155   | 1.678   | 3.577   | 1.467   | 13.626  | 4.253   | 45.452   | 16.593  | 77.256   | 18.479  | 47.295  | 8786.932  | 0.432   | 1.765   | 202.626 | 13.204  | 20.166  | 62.342  | 461.012  | 671.434  |
| 028-65  | 32.731 | 6.915   | 1753.739  | 66.652 | 4.938   | 0.318   | 91.373  | 0.452   | 6.454   | 10.125  | 2.872   | 44.492  | 14.073  | 157.556  | 59.010  | 264.700  | 57.320  | 109.439 | 8302.738  | 1.465   | 0.894   | 102.935 | 5.606   | 13.948  | 33.368  | 614.540  | 684.986  |
| SRM 610 | 70.009 | 434.000 | 450.000   | 0.059  | 419.000 | 457.000 | 448.000 | 430.000 | 431.000 | 451.000 | 461.000 | 444.000 | 443.000 | 427.000  | 449.000 | 426.000  | 420.000 | 435.000 | 432.000   | 452.000 | 426.000 | 426.000 | 426.000 | 426.000 | 426.000 | 457.200  | 461.500  |
| GJ-1std | 32.747 | 3.444   | 236.347   | 66.470 | 1.211   | 0.019   | 12.354  | 0.028   | 0.470   | 1.120   | 0.793   | 5.709   | 1.704   | 17.619   | 6.273   | 27.493   | 5.852   | 12.474  | 6731.924  | 0.304   | 0.688   | 154.074 | 10.401  | 0.390   | 39.644  | 5.977    | 362.942  |
| GJ-1std | 32.747 | 3.598   | 238.630   | 66.612 | 1.303   | 0.011   | 12.413  | 0.011   | 0.464   | 1.077   | 0.871   | 5.722   | 1.793   | 18.231   | 6.240   | 27.062   | 5.991   | 12.741  | 6817.351  | 0.290   | 0.000   | 153.148 | 10.024  | 0.387   | 39.327  | 6.015    | 363.694  |
| Ple     | 32.731 | 72.508  | 468.241   | 66.357 | 3.774   | 0.032   | 1.947   | 0.150   | 1.771   | 2.970   | 0.889   | 12.493  | 4.639   | 50.221   | 14.077  | 49.658   | 8.471   | 8.806   | 10234.359 | 2.233   | 1.012   | 148.222 | 8.713   | 1.969   | 38.693  | 58.090   | 636.767  |
| 91500   | 32.659 | 4.761   | 116.023   | 65.885 | 0.565   | 0.000   | 2.373   | 0.017   | 0.187   | 0.417   | 0.136   | 2.061   | 0.700   | 9.184    | 3.901   | 20.311   | 5.073   | 11.234  | 5200.411  | 0.372   | 0.000   | 52.716  | 4.233   | 2.550   | 14.976  | 23.155   | 67.987   |
| 028-66  | 32.731 | 101.690 | 12086.560 | 63.305 | 37.879  | 10.861  | 503.219 | 36.155  | 313.025 | 358.825 | 122.127 | 738.940 | 213.670 | 1784.266 | 451.682 | 1560.652 | 288.474 | 346.085 | 11668.408 | 8.721   | 26.354  | 150.452 | 33.778  | 40.559  | 65.346  | 2384.036 | 1961.158 |
| 028-67  | 32.731 | 6.368   | 358.800   | 65.898 | 4.184   | 0.002   | 8.958   | 0.023   | 0.440   | 1.062   | 0.053   | 5.657   | 2.147   | 27.780   | 11.439  | 56.607   | 13.198  | 26.122  | 10146.532 | 2.148   | 0.000   | 355.422 | 58.177  | 13.841  | 105.767 | 59.359   | 208.067  |
| 028-68  | 32.731 | 5.162   | 606.111   | 66.150 | 0.948   | 0.046   | 15.021  | 0.199   | 2.728   | 3.838   | 0.982   | 16.554  | 4.816   | 53.952   | 19.371  | 83.934   | 17.562  | 30.877  | 8241.103  | 0.534   | 0.737   | 614.713 | 110.311 | 78.270  | 213.549 | 309.764  | 324.628  |
| 028-69  | 32.731 | 13.338  | 692.253   | 66.255 | 0.953   | 0.004   | 22.921  | 0.086   | 1.425   | 3.182   | 0.509   | 15.664  | 5.038   | 59.755   | 21.905  | 100.550  | 21.334  | 41.982  | 9573.546  | 0.489   | 0.000   | 80.548  | 5.216   | 10.635  | 26.138  | 234.314  | 269.074  |
| 028-70  | 3      |         |           |        |         |         |         |         |         |         |         |         |         |          |         |          |         |         |           |         |         |         |         |         |         |          |          |

|         |        |         |          |        |         |         |         |         |         |         |         |         |         |         |         |         |         |         |           |         |         |         |         |         |         |         |         |
|---------|--------|---------|----------|--------|---------|---------|---------|---------|---------|---------|---------|---------|---------|---------|---------|---------|---------|---------|-----------|---------|---------|---------|---------|---------|---------|---------|---------|
| 028-71  | 32.731 | 0.343   | 334.313  | 65.581 | 0.798   | 0.000   | 2.422   | 0.026   | 0.162   | 0.956   | 0.101   | 6.212   | 2.433   | 29.352  | 10.795  | 50.511  | 11.798  | 30.769  | 10593.242 | 0.653   | 0.000   | 323.987 | 36.919  | 6.175   | 89.475  | 39.138  | 332.490 |
| 028-72  | 32.731 | 7.744   | 364.761  | 66.397 | 1.703   | 0.008   | 9.266   | 0.032   | 0.500   | 1.261   | 0.167   | 6.620   | 2.553   | 30.760  | 12.021  | 55.570  | 11.958  | 23.269  | 9848.309  | 0.987   | 0.000   | 105.971 | 7.819   | 7.379   | 31.134  | 89.022  | 186.935 |
| 028-73  | 32.731 | 5.341   | 365.215  | 66.557 | 0.776   | 0.021   | 13.751  | 0.025   | 0.329   | 0.817   | 0.270   | 5.979   | 2.137   | 26.930  | 11.459  | 56.386  | 13.522  | 32.101  | 10454.702 | 0.553   | 0.000   | 65.615  | 4.053   | 5.026   | 19.343  | 114.087 | 219.376 |
| 028-74  | 32.731 | 13.286  | 584.151  | 66.297 | 1.694   | 0.008   | 41.957  | 0.116   | 2.039   | 3.348   | 1.091   | 15.727  | 4.898   | 55.310  | 19.929  | 86.440  | 17.773  | 33.162  | 7655.277  | 0.717   | 5.132   | 16.246  | 0.927   | 2.220   | 5.355   | 90.744  | 111.081 |
| 028-75  | 32.731 | 4.201   | 1326.575 | 64.594 | 21.441  | 0.273   | 14.970  | 0.687   | 6.515   | 9.083   | 2.287   | 27.377  | 9.743   | 117.242 | 45.930  | 216.242 | 47.846  | 90.928  | 13129.268 | 8.927   | 4.062   | 847.619 | 98.794  | 41.482  | 247.903 | 287.329 | 731.335 |
| SRM 610 | 70.009 | 434.000 | 450.000  | 0.059  | 419.000 | 457.000 | 448.000 | 430.000 | 431.000 | 451.000 | 461.000 | 444.000 | 443.000 | 427.000 | 449.000 | 426.000 | 420.000 | 435.000 | 432.000   | 452.000 | 426.000 | 426.000 | 426.000 | 426.000 | 426.000 | 457.200 | 461.500 |
| GJ-1std | 32.747 | 3.345   | 237.597  | 65.683 | 1.326   | 0.024   | 12.416  | 0.012   | 0.443   | 1.358   | 0.768   | 5.841   | 1.797   | 18.586  | 6.273   | 27.245  | 5.929   | 12.524  | 6843.305  | 0.326   | 0.000   | 154.668 | 10.064  | 0.377   | 39.697  | 6.071   | 364.182 |
| GJ-1std | 32.747 | 10.736  | 240.466  | 66.333 | 1.308   | 0.005   | 12.442  | 0.019   | 0.324   | 1.046   | 0.829   | 5.351   | 1.804   | 18.283  | 6.449   | 28.139  | 5.875   | 12.491  | 6915.555  | 0.309   | 0.567   | 152.223 | 9.945   | 0.366   | 39.083  | 6.143   | 367.685 |
| Ple     | 32.731 | 72.549  | 467.792  | 65.158 | 3.642   | 0.031   | 2.025   | 0.100   | 1.732   | 3.259   | 0.834   | 12.649  | 4.543   | 50.661  | 14.273  | 49.132  | 8.497   | 8.528   | 10025.166 | 2.304   | 0.840   | 150.111 | 8.748   | 2.020   | 39.180  | 58.096  | 635.091 |
| 91500   | 32.659 | 4.666   | 117.681  | 66.737 | 0.541   | 0.000   | 2.214   | 0.009   | 0.157   | 0.351   | 0.216   | 1.696   | 0.652   | 9.422   | 3.993   | 20.685  | 5.271   | 11.082  | 5328.308  | 0.361   | 0.136   | 52.397  | 4.450   | 2.718   | 15.037  | 23.793  | 68.637  |
| 028-76  | 32.731 | 2.810   | 697.500  | 66.167 | 2.090   | 0.012   | 9.952   | 0.072   | 1.311   | 3.175   | 0.511   | 16.867  | 5.365   | 64.574  | 24.765  | 112.613 | 23.142  | 44.299  | 8166.942  | 0.626   | 0.000   | 364.596 | 57.286  | 28.523  | 115.474 | 119.714 | 207.042 |
| 028-77  | 32.731 | 5.366   | 1105.964 | 65.755 | 6.097   | 22.706  | 126.601 | 6.181   | 27.832  | 9.373   | 1.755   | 25.908  | 7.890   | 92.861  | 35.877  | 168.568 | 37.298  | 76.093  | 8780.306  | 2.159   | 3.027   | 94.625  | 5.205   | 8.495   | 28.449  | 378.247 | 634.428 |
| 028-78  | 32.731 | 12.915  | 607.130  | 66.030 | 0.607   | 0.000   | 14.941  | 0.083   | 1.695   | 3.357   | 0.853   | 16.469  | 4.858   | 53.359  | 20.083  | 88.299  | 18.537  | 38.287  | 8905.365  | 0.327   | 0.104   | 49.791  | 3.045   | 6.655   | 16.161  | 148.094 | 164.723 |
| 028-79  | 32.731 | 5.771   | 446.481  | 66.796 | 0.517   | 0.010   | 11.510  | 0.041   | 1.269   | 2.344   | 0.541   | 10.674  | 3.266   | 37.920  | 14.654  | 69.535  | 15.081  | 32.344  | 9516.376  | 0.322   | 1.435   | 161.712 | 25.480  | 12.456  | 51.151  | 55.436  | 95.502  |
| 028-80  | 32.731 | 9.339   | 900.468  | 66.531 | 4.614   | 0.011   | 48.404  | 0.132   | 1.895   | 3.889   | 1.124   | 19.757  | 6.557   | 78.993  | 30.343  | 137.199 | 29.535  | 55.743  | 7629.457  | 1.586   | 0.000   | 36.241  | 2.041   | 3.140   | 10.830  | 144.042 | 248.291 |
| 028-81  | 32.731 | 5.715   | 226.333  | 66.076 | 2.067   | 0.065   | 3.708   | 0.152   | 1.839   | 0.611   | 0.232   | 2.861   | 1.091   | 14.760  | 6.582   | 35.881  | 9.795   | 29.023  | 11818.739 | 1.560   | 4.650   | 578.464 | 70.988  | 6.566   | 158.604 | 42.571  | 790.558 |
| 028-82  | 32.731 | 2.535   | 1017.928 | 66.972 | 4.484   | 0.031   | 7.756   | 0.039   | 0.945   | 2.280   | 0.334   | 16.425  | 6.092   | 80.247  | 34.323  | 171.642 | 37.567  | 77.632  | 9582.458  | 1.377   | 0.569   | 553.754 | 81.647  | 24.482  | 164.335 | 138.361 | 409.883 |
| 028-83  | 32.731 | 1.067   | 102.545  | 66.689 | 0.299   | 0.008   | 4.815   | 0.006   | 0.104   | 0.280   | 0.128   | 1.390   | 0.493   | 6.867   | 3.006   | 16.320  | 4.300   | 13.166  | 9951.409  | 0.267   | 3.306   | 307.556 | 47.693  | 13.548  | 91.807  | 63.211  | 188.492 |
| 028-84  | 32.731 | 9.134   | 848.801  | 66.873 | 3.019   | 0.082   | 10.854  | 0.134   | 1.903   | 3.656   | 0.236   | 19.003  | 6.418   | 74.885  | 29.230  | 130.938 | 26.934  | 48.089  | 8524.159  | 1.125   | 0.000   | 288.869 | 47.830  | 20.404  | 90.880  | 85.404  | 160.289 |
| 028-85  | 32.731 | 8.771   | 683.901  | 66.844 | 1.353   | 0.006   | 21.245  | 0.083   | 1.547   | 3.167   | 0.517   | 15.901  | 5.132   | 58.427  | 22.424  | 102.291 | 22.620  | 46.797  | 9177.436  | 0.784   | 0.677   | 83.968  | 4.999   | 9.310   | 26.229  | 210.711 | 277.128 |
| SRM 610 | 70.009 | 434.000 | 450.000  | 0.059  | 419.000 | 457.000 | 448.000 | 430.000 | 431.000 | 451.000 | 461.000 | 444.000 | 443.000 | 427.000 | 449.000 | 426.000 | 420.000 | 435.000 | 432.000   | 452.000 | 426.000 | 426.000 | 426.000 | 426.000 | 426.000 | 457.200 | 461.500 |
| GJ-1std | 32.747 | 3.136   | 236.406  | 67.506 | 1.311   | 0.024   | 12.401  | 0.029   | 0.416   | 1.083   | 0.823   | 5.846   | 1.746   | 18.241  | 6.331   | 28.400  | 5.922   | 12.492  | 6873.080  | 0.292   | 0.000   | 150.200 | 9.912   | 0.386   | 38.591  | 6.127   | 361.711 |
| GJ-1std | 32.747 | 2.509   | 239.272  | 66.983 | 1.283   | 0.000   | 12.523  | 0.017   | 0.387   | 1.216   | 0.839   | 6.291   | 1.751   | 18.529  | 6.505   | 27.969  | 5.969   | 12.244  | 6848.141  | 0.316   | 0.656   | 151.085 | 9.983   | 0.404   | 38.839  | 6.189   | 364.081 |
| Ple     | 32.731 | 70.286  | 461.989  | 66.612 | 3.803   | 0.007   | 2.013   | 0.121   | 1.646   | 2.915   | 0.823   | 12.765  | 4.837   | 49.126  | 14.425  | 49.479  | 8.446   | 8.435   | 10299.148 | 2.292   | 0.000   | 143.267 | 8.443   | 1.931   | 37.405  | 58.738  | 631.968 |
| 91500   | 32.659 | 5.247   | 117.798  | 66.913 | 0.541   | 0.000   | 2.336   | 0.001   | 0.169   | 0.312   | 0.165   | 2.032   | 0.675   | 9.328   | 4.204   | 20.722  | 5.170   | 11.466  | 5269.178  | 0.405   | 0.000   | 52.415  | 4.338   | 2.637   | 14.973  | 24.610  | 69.114  |
| 028-86  | 32.731 | 7.949   | 897.561  | 67.327 | 1.685   | 0.029   | 9.574   | 0.274   | 4.912   | 7.205   | 0.509   | 28.382  | 8.540   | 90.747  | 31.855  | 133.996 | 26.168  | 43.643  | 8001.520  | 0.636   | 0.847   | 154.850 | 23.338  | 18.099  | 51.972  | 79.968  | 90.765  |
| 028-87  | 32.731 | 5.337   | 724.890  | 66.809 | 2.547   | 0.013   | 5.917   | 0.039   | 0.682   | 2.061   | 0.319   | 12.161  | 4.616   | 59.898  | 24.290  | 119.804 | 27.199  | 57.903  | 9118.216  | 0.920   | 0.000   | 549.842 | 85.534  | 25.737  | 164.901 | 118.889 | 341.363 |
| 028-88  | 32.731 | 2.859   | 430.857  | 67.341 | 0.446   | 0.000   | 6.218   | 0.042   | 0.731   | 1.361   | 0.492   | 7.629   | 2.599   | 32.290  | 13.829  | 66.744  | 15.326  | 36.480  | 9003.583  | 0.152   | 3.733   | 73.654  | 11.551  | 3.162   | 22.012  | 13.966  | 42.338  |
| 028-89  | 32.731 | 8.271   | 2833.528 | 66.394 | 5.760   | 13.169  | 47.792  | 4.540   | 27.010  | 17.790  | 1.531   | 80.140  | 26.363  | 309.678 | 118.188 | 510.695 | 100.703 | 172.808 | 8069.642  | 1.784   | 18.390  | 273.128 | 33.513  | 47.463  | 98.358  | 358.110 | 391.911 |
| 028-90  | 32.731 | 10.069  | 906.217  | 67.108 | 7.179   | 0.371   | 42.964  | 0.182   | 2.038   | 3.534   | 0.659   | 19.740  | 7.018   | 84.732  | 31.834  | 138.410 | 28.190  | 48.688  | 8945.798  | 2.532   | 0.000   | 40.472  | 2.400   | 3.571   | 12.155  | 157.750 | 272.317 |
| 91500   | 32.659 | 4.583   | 118.531  | 67.013 | 0.552   | 0.079   | 2.283   | 0.033   | 0.223   | 0.276   | 0.225   | 1.805   | 0.721   | 9.520   | 3.926   | 20.462  | 4.985   | 11.413  | 5154.835  | 0.416   | 1.232   | 51.944  | 4.448   | 2.876   | 15.026  | 24.403  | 69.635  |
| Ple     | 32.731 | 69.782  | 472.882  | 67.119 | 3.709   | 0.035   | 2.018   | 0.119   | 1.714   | 3.333   | 0.876   | 12.392  | 4.872   | 50.369  | 14.444  | 50.465  | 8.552   | 8.682   | 10161.988 | 2.256   | 1.907   | 149.389 | 8.984   | 2.027   | 39.077  | 60.144  | 640.735 |
| GJ-1std | 32.747 | 3.229   | 242.766  | 68.002 | 1.384   | 0.000   | 12.592  | 0.013   | 0.529   | 1.123   | 0.887   | 5.773   | 1.797   | 18.650  | 6.514   | 28.555  | 6.086   | 12.745  | 6942.456  | 0.336   | 3.835   | 153.691 | 10.338  | 0.351   | 39.562  | 6.282   | 374.109 |
| GJ-1std | 32.747 | 3.778   | 241.619  | 67.620 | 1.232   | 0.000   | 12.712  | 0.019   | 0.466   | 0.973   | 0.768   | 6.219   | 1.784   | 18.608  | 6.538   | 28.574  | 6.068   | 12.734  | 6858.426  | 0.298   | 1.920   | 154.599 | 10.177  | 0.374   | 39.730  | 6.303   | 371.049 |
| SRM 610 | 70.009 | 434.000 | 450.000  | 0.059  | 419.000 | 457.000 | 448.000 | 430.000 | 431.000 | 451.000 | 461.000 | 444.000 | 443.000 | 427.000 | 449.000 | 426.000 | 420.000 | 435.000 | 432.000   | 452.000 | 426.000 | 426.000 | 426.000 | 426.000 | 426.000 | 457.200 | 461.500 |
| SRM 610 | 70.009 | 434.000 | 450.000  | 0.059  | 419.000 | 457.000 | 448.000 | 430.000 | 431.000 | 451.000 | 461.000 | 444.000 | 443.000 | 427.000 | 449.000 | 426.000 | 420.000 | 435.000 | 432.000   | 452.000 | 426.000 | 426.000 | 426.000 | 426.000 | 426.000 | 457.200 | 461.500 |
| GJ-1std | 32.747 | 3.768   | 245.442  | 68.194 | 1.312   | 0.018   | 13.020  | 0.021   | 0.446   | 1.077   | 0.769   | 6.107   | 1.877   | 19.206  | 6.764   | 29.336  | 6.249   | 13.189  | 6935.619  | 0.295   | 0.000   | 159.064 | 10.704  | 0.493   | 40.958  | 6.391   | 379.225 |
| GJ-1std | 32.747 | 3.318   | 244.805  | 68.044 | 1.366   | 0.000   | 12.532  | 0.116   | 0.476   | 1.391   | 0.886   | 6.057   | 1.904   | 18.808  | 6.704   | 29.634  | 6.243   | 13.336  | 6973.249  | 0.293   | 0.000   | 159.568 | 10.523  | 0.444   | 41.014  | 6.363   | 380.950 |
| Ple     | 32.731 | 56.574  | 331.632  | 67.014 | 2.920   | 0.000   | 1.529   | 0.111   | 1.084   | 2.137   | 0.584   | 8.087   | 3.327   | 34.804  | 10.256  | 36.234  | 6.156   | 6.310   | 10732.045 | 1.715   | 0.000   | 107.819 | 6.250   | 1.250   | 28.021  | 41.994  | 468.035 |
| 91500   | 32.659 | 4.335   | 109.590  | 66.426 | 0.606   | 0.043   | 2.139   | 0.048   | 0.060   | 0.403   | 0.235   | 2.030   | 0.709   | 8.847   | 3.713   | 19.895  | 5.043   | 10.719  | 5199.315  | 0.384   | 0.549   | 52.276  | 4.396   | 2.723   | 15.005  | 24.320  | 68.469  |
| 028-91  | 32.731 | 7.814   | 588.172  | 66.730 | 1.937   | 0.010   | 17.168  | 0       |         |         |         |         |         |         |         |         |         |         |           |         |         |         |         |         |         |         |         |

|         |        |         |          |        |         |         |         |         |         |         |         |         |         |         |         |         |         |         |           |         |         |         |         |         |         |         |          |
|---------|--------|---------|----------|--------|---------|---------|---------|---------|---------|---------|---------|---------|---------|---------|---------|---------|---------|---------|-----------|---------|---------|---------|---------|---------|---------|---------|----------|
| 028-92  | 32.731 | 5.375   | 622.584  | 67.585 | 2.653   | 47.863  | 139.655 | 15.507  | 69.300  | 14.779  | 0.972   | 23.855  | 5.494   | 57.484  | 21.161  | 95.162  | 19.690  | 38.509  | 9579.703  | 1.059   | 0.000   | 352.231 | 52.081  | 33.397  | 113.897 | 154.455 | 218.969  |
| 028-93  | 32.731 | 7.923   | 545.264  | 63.465 | 4.285   | 0.028   | 9.133   | 0.091   | 1.134   | 2.237   | 0.175   | 10.632  | 3.620   | 45.496  | 18.389  | 86.964  | 19.501  | 36.832  | 10149.265 | 1.979   | 1.632   | 171.938 | 20.423  | 11.008  | 51.742  | 63.582  | 142.331  |
| 028-94  | 32.731 | 6.297   | 1768.464 | 67.036 | 13.590  | 0.017   | 102.790 | 0.091   | 3.065   | 6.979   | 1.395   | 40.236  | 14.356  | 171.878 | 64.029  | 271.384 | 54.053  | 90.392  | 8881.037  | 3.583   | 1.210   | 91.922  | 5.297   | 11.500  | 29.367  | 533.103 | 636.371  |
| 028-95  | 32.731 | 8.754   | 354.635  | 66.607 | 0.490   | 0.013   | 10.756  | 0.019   | 0.619   | 1.468   | 0.362   | 7.192   | 2.457   | 28.840  | 11.378  | 54.108  | 12.112  | 26.779  | 8790.727  | 0.318   | 1.972   | 38.232  | 2.382   | 3.707   | 11.710  | 86.871  | 130.002  |
| 028-96  | 32.731 | 17.012  | 702.013  | 67.023 | 0.943   | 0.028   | 6.639   | 0.159   | 2.751   | 4.838   | 0.330   | 20.732  | 6.397   | 68.527  | 25.017  | 105.102 | 20.494  | 35.819  | 8381.797  | 0.317   | 1.463   | 33.730  | 4.181   | 4.179   | 11.263  | 24.489  | 25.957   |
| 028-97  | 32.731 | 9.020   | 1428.430 | 67.058 | 10.460  | 0.038   | 18.575  | 0.290   | 4.452   | 7.185   | 0.463   | 35.968  | 11.643  | 135.025 | 51.026  | 223.651 | 46.067  | 79.362  | 9703.935  | 3.437   | 0.000   | 267.246 | 30.861  | 28.000  | 85.899  | 166.121 | 241.441  |
| 028-98  | 32.731 | 7.317   | 1182.415 | 67.231 | 2.252   | 0.165   | 3.687   | 0.121   | 1.507   | 2.822   | 0.368   | 21.489  | 8.386   | 103.660 | 40.885  | 187.727 | 39.136  | 73.126  | 9179.996  | 1.432   | 0.000   | 167.011 | 20.687  | 12.317  | 51.276  | 68.515  | 128.909  |
| 028-99  | 32.731 | 15.917  | 395.073  | 67.444 | 1.316   | 0.011   | 5.957   | 0.046   | 0.940   | 1.878   | 0.159   | 8.979   | 3.088   | 36.584  | 13.507  | 61.068  | 12.597  | 23.151  | 8894.732  | 0.415   | 0.918   | 35.777  | 4.315   | 3.280   | 11.308  | 19.060  | 28.188   |
| 028-100 | 32.731 | 6.459   | 1137.258 | 66.990 | 3.100   | 0.021   | 87.696  | 0.187   | 3.300   | 6.051   | 2.729   | 25.278  | 8.153   | 94.747  | 36.348  | 164.562 | 35.419  | 71.175  | 7680.132  | 0.501   | 0.000   | 87.152  | 5.223   | 14.054  | 29.522  | 337.909 | 299.094  |
| SRM 610 | 70.009 | 434.000 | 450.000  | 0.059  | 419.000 | 457.000 | 448.000 | 430.000 | 431.000 | 451.000 | 461.000 | 444.000 | 443.000 | 427.000 | 449.000 | 426.000 | 420.000 | 435.000 | 432.000   | 452.000 | 426.000 | 426.000 | 426.000 | 426.000 | 426.000 | 457.200 | 461.500  |
| GJ-1std | 32.747 | 2.838   | 238.748  | 65.989 | 1.314   | 0.020   | 12.537  | 0.009   | 0.427   | 1.223   | 0.870   | 6.179   | 1.740   | 18.318  | 6.335   | 28.217  | 6.089   | 12.470  | 6640.564  | 0.288   | 0.000   | 151.967 | 10.027  | 0.441   | 39.071  | 6.212   | 366.043  |
| GJ-1std | 32.747 | 2.272   | 238.119  | 65.596 | 1.367   | 0.010   | 12.390  | 0.005   | 0.440   | 1.063   | 0.846   | 5.979   | 1.752   | 18.638  | 6.473   | 28.020  | 6.090   | 12.287  | 6637.047  | 0.324   | 3.432   | 149.165 | 9.960   | 0.348   | 38.380  | 6.177   | 362.845  |
| Ple     | 32.731 | 56.448  | 332.888  | 64.747 | 2.974   | 0.021   | 1.468   | 0.093   | 1.182   | 2.167   | 0.594   | 8.534   | 3.267   | 35.425  | 10.077  | 35.546  | 6.119   | 6.269   | 9957.257  | 1.792   | 0.393   | 105.018 | 6.049   | 1.395   | 27.383  | 40.185  | 458.867  |
| 91500   | 32.659 | 4.345   | 111.022  | 66.227 | 0.542   | 0.000   | 2.080   | 0.015   | 0.136   | 0.408   | 0.189   | 1.736   | 0.705   | 8.882   | 3.723   | 19.325  | 4.839   | 10.685  | 5040.376  | 0.381   | 0.939   | 51.638  | 4.340   | 2.652   | 14.807  | 23.960  | 67.997   |
| 028-101 | 32.731 | 6.278   | 1464.239 | 64.442 | 2.392   | 11.051  | 79.651  | 2.893   | 16.696  | 11.215  | 2.639   | 41.227  | 12.164  | 133.562 | 48.886  | 217.277 | 46.033  | 85.890  | 7934.478  | 0.964   | 0.000   | 55.495  | 3.110   | 7.844   | 18.172  | 359.404 | 377.938  |
| 028-102 | 32.731 | 5.459   | 633.886  | 63.885 | 1.666   | 0.000   | 5.061   | 0.035   | 0.540   | 1.455   | 0.094   | 9.957   | 3.983   | 52.705  | 21.063  | 98.546  | 21.410  | 40.612  | 9168.012  | 1.183   | 2.624   | 325.701 | 39.293  | 16.562  | 95.893  | 89.967  | 241.622  |
| 028-103 | 32.731 | 4.768   | 227.162  | 63.981 | 0.430   | 0.000   | 9.118   | 0.016   | 0.358   | 0.909   | 0.264   | 4.713   | 1.529   | 17.475  | 6.950   | 34.452  | 7.907   | 18.848  | 8967.063  | 0.218   | 0.000   | 139.995 | 21.865  | 9.587   | 43.594  | 42.292  | 81.185   |
| 028-104 | 32.731 | 16.268  | 522.991  | 63.971 | 0.780   | 0.000   | 4.126   | 0.107   | 1.719   | 3.063   | 0.373   | 14.403  | 4.306   | 49.740  | 17.671  | 75.593  | 14.800  | 26.875  | 7858.640  | 0.269   | 0.000   | 24.311  | 2.808   | 2.614   | 7.849   | 14.902  | 18.356   |
| 028-105 | 32.731 | 17.532  | 552.202  | 63.217 | 1.054   | 0.016   | 4.950   | 0.093   | 1.783   | 2.628   | 0.329   | 14.113  | 4.295   | 50.447  | 18.477  | 79.475  | 16.617  | 29.535  | 7417.410  | 0.360   | 0.000   | 29.794  | 3.620   | 3.435   | 9.780   | 18.496  | 22.383   |
| 028-106 | 32.731 | 117.866 | 336.868  | 58.344 | 1.934   | 0.003   | 5.899   | 0.030   | 0.976   | 1.549   | 0.287   | 8.645   | 2.442   | 29.341  | 11.391  | 53.536  | 11.631  | 25.035  | 6570.420  | 0.263   | 0.232   | 102.001 | 16.000  | 8.014   | 32.321  | 33.430  | 58.644   |
| 028-107 | 32.731 | 4.368   | 852.724  | 61.952 | 0.734   | 0.000   | 4.952   | 0.090   | 2.112   | 4.561   | 0.212   | 25.834  | 8.742   | 90.069  | 28.296  | 107.893 | 19.788  | 29.435  | 9807.948  | 0.494   | 0.000   | 274.744 | 21.647  | 23.583  | 83.355  | 241.526 | 395.734  |
| 028-108 | 32.731 | 4.367   | 1314.374 | 68.852 | 9.933   | 2.346   | 73.196  | 0.734   | 5.120   | 4.954   | 1.199   | 26.637  | 9.580   | 116.067 | 45.410  | 206.145 | 43.377  | 81.001  | 8846.041  | 3.161   | 0.000   | 77.134  | 4.603   | 5.685   | 22.586  | 270.447 | 552.836  |
| 028-109 | 32.731 | 3.793   | 467.541  | 68.460 | 1.479   | 0.011   | 5.190   | 0.030   | 0.698   | 1.583   | 0.287   | 9.145   | 3.035   | 38.160  | 15.679  | 77.318  | 17.383  | 40.507  | 8800.190  | 0.740   | 0.000   | 263.148 | 40.208  | 11.680  | 78.425  | 53.497  | 173.934  |
| 028-110 | 32.731 | 9.712   | 1459.322 | 67.170 | 9.545   | 0.041   | 88.769  | 0.143   | 3.037   | 5.885   | 1.172   | 32.684  | 10.889  | 130.842 | 49.999  | 224.847 | 46.299  | 86.904  | 8111.021  | 2.494   | 0.000   | 61.003  | 3.437   | 5.671   | 18.433  | 256.263 | 415.183  |
| SRM 610 | 70.009 | 434.000 | 450.000  | 0.059  | 419.000 | 457.000 | 448.000 | 430.000 | 431.000 | 451.000 | 461.000 | 444.000 | 443.000 | 427.000 | 449.000 | 426.000 | 420.000 | 435.000 | 432.000   | 452.000 | 426.000 | 426.000 | 426.000 | 426.000 | 426.000 | 457.200 | 461.500  |
| GJ-1std | 32.747 | 2.568   | 241.169  | 66.244 | 1.360   | 0.000   | 12.690  | 0.018   | 0.384   | 1.075   | 0.914   | 6.503   | 1.742   | 18.644  | 6.632   | 28.398  | 5.995   | 12.781  | 6702.396  | 0.305   | 0.000   | 152.959 | 9.796   | 0.366   | 39.220  | 6.070   | 366.767  |
| SRM 610 | 70.009 | 434.000 | 450.000  | 0.059  | 419.000 | 457.000 | 448.000 | 430.000 | 431.000 | 451.000 | 461.000 | 444.000 | 443.000 | 427.000 | 449.000 | 426.000 | 420.000 | 435.000 | 432.000   | 452.000 | 426.000 | 426.000 | 426.000 | 426.000 | 426.000 | 457.200 | 461.500  |
| GJ-1std | 32.747 | 3.518   | 244.967  | 66.305 | 1.334   | 0.013   | 12.576  | 0.019   | 0.305   | 1.178   | 0.854   | 6.145   | 1.833   | 18.816  | 6.570   | 28.862  | 6.128   | 12.926  | 6888.089  | 0.319   | 2.181   | 155.713 | 10.411  | 0.418   | 40.077  | 6.407   | 378.430  |
| GJ-1std | 32.747 | 2.654   | 242.225  | 65.372 | 1.276   | 0.000   | 12.548  | 0.035   | 0.464   | 1.031   | 0.888   | 5.926   | 1.835   | 18.522  | 6.530   | 28.705  | 6.158   | 12.770  | 6782.377  | 0.328   | 2.778   | 154.804 | 10.185  | 0.352   | 39.782  | 6.278   | 373.946  |
| Ple     | 32.731 | 56.952  | 353.959  | 65.969 | 3.056   | 0.000   | 1.560   | 0.101   | 1.247   | 1.958   | 0.598   | 8.979   | 3.472   | 38.024  | 10.789  | 37.729  | 6.594   | 6.686   | 10482.569 | 1.869   | 0.360   | 112.321 | 6.537   | 1.490   | 29.300  | 43.685  | 496.259  |
| 91500   | 32.659 | 3.575   | 115.041  | 66.542 | 0.559   | 0.000   | 2.159   | 0.016   | 0.231   | 0.365   | 0.242   | 1.975   | 0.740   | 9.564   | 3.949   | 20.636  | 4.960   | 11.173  | 5272.139  | 0.399   | 2.996   | 54.560  | 4.606   | 2.716   | 15.632  | 25.538  | 72.433   |
| 028-111 | 32.731 | 7.254   | 742.270  | 66.741 | 0.520   | 0.010   | 16.313  | 0.117   | 2.007   | 3.733   | 1.038   | 17.559  | 5.617   | 63.929  | 24.268  | 112.827 | 24.262  | 50.549  | 9230.162  | 0.362   | 0.000   | 72.390  | 4.495   | 9.823   | 23.587  | 228.071 | 247.782  |
| 028-112 | 32.731 | 15.152  | 1058.074 | 66.762 | 0.847   | 0.024   | 23.407  | 0.298   | 4.995   | 7.569   | 1.408   | 30.494  | 9.007   | 98.796  | 35.373  | 154.165 | 32.036  | 60.900  | 8384.843  | 0.513   | 0.000   | 91.045  | 5.680   | 14.271  | 30.675  | 335.635 | 308.981  |
| 028-113 | 32.731 | 9.684   | 413.226  | 66.841 | 0.735   | 0.000   | 15.888  | 0.034   | 0.676   | 1.466   | 0.583   | 9.244   | 2.958   | 33.522  | 13.177  | 62.551  | 14.151  | 30.835  | 9216.490  | 0.422   | 1.676   | 60.521  | 3.760   | 6.283   | 18.732  | 149.312 | 206.886  |
| 028-114 | 32.731 | 19.761  | 2734.927 | 63.946 | 4.872   | 26.227  | 142.150 | 16.147  | 112.150 | 97.210  | 33.378  | 192.806 | 52.509  | 429.934 | 110.816 | 389.403 | 74.323  | 121.177 | 9628.439  | 0.697   | 0.000   | 200.671 | 14.015  | 16.165  | 59.930  | 935.990 | 1460.058 |
| 028-115 | 32.731 | 8.059   | 664.802  | 65.925 | 0.895   | 151.848 | 345.205 | 40.121  | 162.846 | 30.500  | 3.753   | 37.112  | 7.305   | 65.988  | 22.286  | 93.981  | 20.068  | 40.535  | 9714.367  | 0.477   | 0.478   | 78.704  | 5.711   | 10.934  | 25.966  | 224.055 | 258.146  |
| 028-116 | 32.731 | 7.532   | 483.684  | 67.456 | 3.161   | 0.000   | 8.302   | 0.036   | 0.883   | 1.887   | 0.126   | 10.517  | 3.475   | 41.528  | 16.547  | 76.272  | 16.373  | 30.609  | 10643.551 | 1.299   | 3.877   | 104.957 | 12.448  | 7.125   | 31.833  | 39.540  | 81.550   |
| 028-117 | 32.731 | 8.259   | 2938.676 | 66.363 | 10.831  | 0.136   | 173.616 | 1.041   | 17.147  | 29.847  | 5.511   | 145.353 | 44.370  | 460.487 | 154.322 | 602.858 | 111.044 | 164.420 | 7970.305  | 2.610   | 0.000   | 100.690 | 5.542   | 20.390  | 36.175  | 949.369 | 698.176  |
| 028-118 | 32.731 | 4.025   | 603.513  | 66.626 | 1.461   | 0.000   | 13.172  | 0.092   | 1.301   | 2.657   | 0.580   | 11.065  | 3.731   | 46.316  | 18.726  | 93.506  | 21.925  | 49.209  | 8529.702  | 0.675   | 3.885   | 401.933 | 64.614  | 25.610  | 124.620 | 116.186 | 243.860  |
| 028-119 | 32.731 | 16.709  | 2905.089 | 66.627 | 4.652   | 0.225   | 20.287  | 1.263   | 15.906  | 20.311  | 0.757   | 104.366 | 31.672  | 357.248 | 129.599 | 529.045 | 96.343  | 148.699 | 8523.534  | 2.227   | 1.260   | 343.535 | 41.283  | 58.058  | 122.355 | 330.034 | 264.983  |
| 0       |        |         |          |        |         |         |         |         |         |         |         |         |         |         |         |         |         |         |           |         |         |         |         |         |         |         |          |

|         |        |         |          |        |         |         |         |         |         |         |         |         |         |         |         |         |         |         |           |         |         |         |         |         |         |         |         |
|---------|--------|---------|----------|--------|---------|---------|---------|---------|---------|---------|---------|---------|---------|---------|---------|---------|---------|---------|-----------|---------|---------|---------|---------|---------|---------|---------|---------|
| SRM 610 | 70.009 | 434.000 | 450.000  | 0.059  | 419.000 | 457.000 | 448.000 | 430.000 | 431.000 | 451.000 | 461.000 | 444.000 | 443.000 | 427.000 | 449.000 | 426.000 | 420.000 | 435.000 | 432.000   | 452.000 | 426.000 | 426.000 | 426.000 | 426.000 | 426.000 | 457.200 | 461.500 |
| GJ-Istd | 32.747 | 2.922   | 246.930  | 66.876 | 1.445   | 0.001   | 12.567  | 0.013   | 0.368   | 1.081   | 0.811   | 6.051   | 1.729   | 19.139  | 6.635   | 28.974  | 6.220   | 13.105  | 6857.565  | 0.359   | 0.000   | 154.555 | 10.318  | 0.417   | 39.746  | 6.385   | 377.639 |
| GJ-Istd | 32.747 | 3.252   | 249.146  | 67.066 | 1.276   | 0.000   | 12.751  | 0.016   | 0.459   | 1.272   | 0.918   | 6.221   | 1.884   | 19.151  | 6.608   | 28.767  | 6.259   | 12.859  | 6921.042  | 0.356   | 0.145   | 156.164 | 10.385  | 0.442   | 40.164  | 6.367   | 379.926 |
| Ple     | 32.731 | 58.204  | 343.030  | 66.954 | 3.087   | 0.000   | 1.521   | 0.106   | 1.141   | 2.157   | 0.535   | 8.591   | 3.423   | 36.865  | 10.426  | 36.878  | 6.360   | 6.528   | 10608.554 | 1.694   | 3.913   | 108.434 | 6.434   | 1.405   | 28.345  | 42.092  | 479.701 |
| 91500   | 32.659 | 2.559   | 117.804  | 67.673 | 0.586   | 0.005   | 2.145   | 0.019   | 0.154   | 0.370   | 0.214   | 1.924   | 0.729   | 9.482   | 3.973   | 21.400  | 5.117   | 11.195  | 5283.341  | 0.420   | 0.000   | 54.758  | 4.489   | 2.697   | 15.602  | 25.807  | 73.968  |
| 028-121 | 32.731 | 9.944   | 1135.154 | 67.285 | 5.169   | 0.841   | 14.980  | 0.453   | 3.401   | 4.436   | 0.789   | 24.408  | 8.410   | 102.793 | 40.192  | 186.678 | 40.084  | 79.330  | 9176.510  | 1.503   | 5.263   | 472.116 | 61.019  | 30.087  | 143.104 | 265.980 | 613.502 |
| 028-122 | 32.731 | 5.397   | 720.401  | 67.097 | 6.046   | 0.024   | 8.561   | 0.083   | 1.426   | 3.147   | 0.257   | 17.437  | 5.745   | 66.568  | 25.232  | 111.689 | 23.049  | 45.087  | 9043.076  | 2.525   | 3.916   | 277.643 | 52.863  | 15.581  | 86.814  | 59.506  | 143.000 |
| 028-123 | 32.731 | 3.386   | 306.927  | 66.869 | 0.584   | 0.000   | 7.696   | 0.022   | 0.452   | 0.904   | 0.367   | 5.870   | 1.950   | 23.685  | 9.874   | 47.513  | 11.026  | 26.550  | 9547.517  | 0.314   | 0.000   | 161.213 | 35.394  | 7.811   | 50.767  | 26.292  | 71.865  |
| 028-124 | 32.731 | 9.312   | 479.641  | 67.124 | 1.446   | 0.017   | 12.266  | 0.038   | 1.015   | 1.844   | 0.211   | 10.483  | 3.529   | 42.058  | 16.524  | 73.733  | 15.548  | 27.435  | 9130.232  | 0.617   | 3.906   | 147.564 | 21.777  | 14.607  | 48.084  | 67.435  | 91.283  |
| 028-125 | 32.731 | 4.207   | 1236.702 | 67.102 | 0.997   | 0.023   | 21.375  | 0.368   | 5.921   | 9.266   | 2.418   | 37.696  | 10.824  | 115.621 | 41.710  | 180.840 | 37.215  | 77.557  | 9348.813  | 0.393   | 0.000   | 388.597 | 61.179  | 34.531  | 125.266 | 155.337 | 232.588 |
| 028-126 | 32.731 | 8.009   | 689.118  | 66.724 | 1.549   | 0.027   | 20.559  | 0.083   | 1.340   | 2.471   | 0.647   | 13.115  | 4.551   | 54.247  | 21.787  | 107.061 | 24.859  | 55.515  | 9359.085  | 0.956   | 3.091   | 97.686  | 5.978   | 9.797   | 30.040  | 224.669 | 335.092 |
| 028-127 | 32.731 | 9.860   | 547.450  | 67.410 | 1.108   | 0.026   | 19.572  | 0.039   | 1.020   | 2.229   | 0.555   | 12.498  | 4.078   | 45.996  | 17.631  | 81.902  | 18.270  | 39.384  | 9339.688  | 0.563   | 0.881   | 76.534  | 4.708   | 8.342   | 23.869  | 197.781 | 264.881 |
| 028-128 | 32.731 | 8.544   | 1785.287 | 66.764 | 3.841   | 0.031   | 63.702  | 0.485   | 7.687   | 11.641  | 2.932   | 53.549  | 16.421  | 182.050 | 64.229  | 267.849 | 51.566  | 85.664  | 8283.918  | 1.436   | 0.548   | 60.992  | 3.520   | 7.991   | 19.672  | 379.462 | 426.180 |
| 028-129 | 32.731 | 8.006   | 529.334  | 67.827 | 2.364   | 0.000   | 8.031   | 0.051   | 0.847   | 1.836   | 0.108   | 9.677   | 3.626   | 45.351  | 17.867  | 83.284  | 17.754  | 33.405  | 8706.873  | 1.009   | 0.745   | 193.822 | 31.984  | 10.831  | 59.465  | 46.785  | 109.467 |
| 028-130 | 32.731 | 6.948   | 1149.007 | 66.223 | 5.132   | 0.000   | 27.968  | 0.132   | 2.137   | 4.470   | 0.283   | 23.423  | 8.279   | 98.223  | 39.418  | 182.522 | 38.775  | 72.309  | 9218.024  | 1.843   | 2.716   | 833.796 | 139.762 | 70.026  | 268.564 | 301.004 | 477.914 |
| SRM 610 | 70.009 | 434.000 | 450.000  | 0.059  | 419.000 | 457.000 | 448.000 | 430.000 | 431.000 | 451.000 | 461.000 | 444.000 | 443.000 | 427.000 | 449.000 | 426.000 | 420.000 | 435.000 | 432.000   | 452.000 | 426.000 | 426.000 | 426.000 | 426.000 | 426.000 | 457.200 | 461.500 |
| GJ-Istd | 32.747 | 2.157   | 246.872  | 67.026 | 1.359   | 0.012   | 13.087  | 0.027   | 0.389   | 1.294   | 0.925   | 6.437   | 1.722   | 18.701  | 6.697   | 29.196  | 6.181   | 12.828  | 6928.214  | 0.357   | 0.049   | 156.569 | 10.103  | 0.360   | 40.155  | 6.294   | 379.164 |
| GJ-Istd | 32.747 | 3.322   | 243.344  | 65.868 | 1.359   | 0.000   | 12.487  | 0.021   | 0.494   | 1.141   | 0.845   | 6.304   | 1.814   | 18.595  | 6.514   | 28.417  | 6.102   | 12.947  | 6801.200  | 0.319   | 3.858   | 155.306 | 10.276  | 0.369   | 39.947  | 6.402   | 374.931 |
| Ple     | 32.731 | 59.115  | 353.489  | 67.002 | 3.152   | 0.011   | 1.619   | 0.102   | 1.085   | 2.101   | 0.645   | 9.210   | 3.418   | 37.362  | 10.681  | 38.352  | 6.506   | 6.679   | 10678.285 | 1.899   | 4.856   | 114.528 | 6.702   | 1.584   | 29.980  | 43.208  | 493.000 |
| 91500   | 32.659 | 3.990   | 117.551  | 67.332 | 0.541   | 0.000   | 2.192   | 0.012   | 0.229   | 0.367   | 0.224   | 2.203   | 0.691   | 9.440   | 3.972   | 20.444  | 5.253   | 11.153  | 5278.950  | 0.403   | 3.087   | 55.064  | 4.593   | 2.830   | 15.812  | 25.829  | 72.902  |
| 028-131 | 32.731 | 23.554  | 675.097  | 67.143 | 1.123   | 0.236   | 6.130   | 0.254   | 3.329   | 4.620   | 0.515   | 19.804  | 5.973   | 65.182  | 23.487  | 100.330 | 19.915  | 34.453  | 8475.900  | 0.398   | 0.000   | 30.912  | 3.937   | 4.184   | 10.513  | 22.677  | 23.214  |
| 028-132 | 32.731 | 17.230  | 543.493  | 67.307 | 1.889   | 0.264   | 7.590   | 0.196   | 1.638   | 2.840   | 0.256   | 13.820  | 4.128   | 51.094  | 19.007  | 83.283  | 16.886  | 31.765  | 8650.192  | 0.646   | 1.112   | 39.590  | 4.780   | 4.428   | 12.933  | 25.239  | 30.549  |
| 028-133 | 32.731 | 5.503   | 674.832  | 66.530 | 2.408   | 0.099   | 18.076  | 0.087   | 0.973   | 2.501   | 0.174   | 13.792  | 4.945   | 58.690  | 22.928  | 104.725 | 22.019  | 39.290  | 10108.611 | 1.150   | 0.202   | 364.286 | 53.923  | 28.791  | 114.799 | 141.958 | 241.596 |
| 028-134 | 32.731 | 5.439   | 871.832  | 67.459 | 7.304   | 0.010   | 16.742  | 0.056   | 1.062   | 2.530   | 0.066   | 15.476  | 5.931   | 75.802  | 30.503  | 141.431 | 29.148  | 51.643  | 10940.559 | 2.637   | 0.000   | 212.794 | 25.544  | 17.188  | 65.935  | 97.998  | 165.339 |
| 028-135 | 32.731 | 6.034   | 893.458  | 67.521 | 5.235   | 0.003   | 42.678  | 0.117   | 2.355   | 3.920   | 0.849   | 20.692  | 6.760   | 81.550  | 31.002  | 135.149 | 28.186  | 51.334  | 9233.299  | 2.093   | 2.146   | 35.852  | 2.004   | 3.313   | 10.849  | 156.933 | 248.109 |
| 028-136 | 32.731 | 3.287   | 410.173  | 66.996 | 2.042   | 0.175   | 50.474  | 0.335   | 2.878   | 3.094   | 1.439   | 13.316  | 3.799   | 37.861  | 13.101  | 56.820  | 12.417  | 25.530  | 8968.386  | 0.748   | 2.059   | 101.358 | 7.569   | 18.022  | 35.573  | 379.628 | 341.738 |
| 028-137 | 32.731 | 7.023   | 339.174  | 66.927 | 1.088   | 0.025   | 10.258  | 0.067   | 0.964   | 1.390   | 0.200   | 6.672   | 2.180   | 27.718  | 10.888  | 52.985  | 12.472  | 26.891  | 10132.922 | 0.710   | 1.888   | 367.442 | 45.198  | 17.527  | 107.753 | 104.174 | 298.037 |
| 028-138 | 32.731 | 3.057   | 656.777  | 67.177 | 1.141   | 0.000   | 10.529  | 0.038   | 0.757   | 2.057   | 0.645   | 14.005  | 4.556   | 55.985  | 21.554  | 98.686  | 21.410  | 46.055  | 9909.596  | 0.382   | 3.963   | 157.582 | 24.983  | 8.244   | 47.874  | 34.812  | 93.260  |
| 028-139 | 32.731 | 15.476  | 435.176  | 66.813 | 1.823   | 0.035   | 8.429   | 0.064   | 1.020   | 1.784   | 0.173   | 10.435  | 3.203   | 38.271  | 14.889  | 65.248  | 13.464  | 24.372  | 8817.277  | 0.699   | 0.000   | 48.697  | 5.979   | 5.484   | 15.931  | 30.079  | 37.934  |
| 028-140 | 32.731 | 4.637   | 741.847  | 66.901 | 3.487   | 0.025   | 20.050  | 0.108   | 1.882   | 3.477   | 0.272   | 16.395  | 5.518   | 63.698  | 24.766  | 114.822 | 24.850  | 48.150  | 8964.973  | 1.232   | 0.000   | 496.529 | 78.020  | 38.652  | 157.159 | 194.661 | 320.125 |
| SRM 610 | 70.009 | 434.000 | 450.000  | 0.059  | 419.000 | 457.000 | 448.000 | 430.000 | 431.000 | 451.000 | 461.000 | 444.000 | 443.000 | 427.000 | 449.000 | 426.000 | 420.000 | 435.000 | 432.000   | 452.000 | 426.000 | 426.000 | 426.000 | 426.000 | 426.000 | 457.200 | 461.500 |
| GJ-Istd | 32.747 | 3.562   | 246.047  | 66.625 | 1.351   | 0.006   | 12.670  | 0.024   | 0.449   | 1.040   | 0.852   | 6.350   | 1.781   | 19.351  | 6.546   | 28.983  | 6.268   | 12.883  | 6927.964  | 0.351   | 0.000   | 155.883 | 10.634  | 0.382   | 40.118  | 6.184   | 379.937 |
| GJ-Istd | 32.747 | 2.463   | 244.120  | 66.566 | 1.253   | 0.000   | 12.684  | 0.012   | 0.465   | 1.198   | 0.815   | 6.256   | 1.731   | 19.092  | 6.588   | 28.720  | 6.166   | 12.835  | 6926.052  | 0.280   | 2.186   | 155.289 | 10.518  | 0.311   | 39.942  | 6.275   | 378.032 |
| Ple     | 32.731 | 55.437  | 354.355  | 65.066 | 3.080   | 0.016   | 1.578   | 0.102   | 1.180   | 2.298   | 0.607   | 9.476   | 3.383   | 37.231  | 10.648  | 37.606  | 6.644   | 6.650   | 10457.116 | 1.897   | 0.000   | 114.111 | 6.772   | 1.468   | 29.767  | 43.134  | 497.092 |
| 91500   | 32.659 | 4.224   | 112.014  | 66.051 | 0.566   | 0.012   | 2.073   | 0.001   | 0.173   | 0.347   | 0.200   | 2.004   | 0.671   | 8.997   | 3.864   | 19.884  | 4.895   | 10.621  | 5235.948  | 0.392   | 1.109   | 51.643  | 4.365   | 2.623   | 14.801  | 23.780  | 68.234  |
| 028-141 | 32.731 | 7.025   | 1464.073 | 66.780 | 8.233   | 0.010   | 28.010  | 0.136   | 2.508   | 5.131   | 0.960   | 28.329  | 10.250  | 126.359 | 49.998  | 231.693 | 50.439  | 98.975  | 8073.209  | 2.834   | 0.748   | 59.936  | 3.338   | 4.364   | 17.479  | 203.928 | 419.456 |
| 028-142 | 32.731 | 5.913   | 845.948  | 66.710 | 1.351   | 0.000   | 14.842  | 0.030   | 0.629   | 1.779   | 0.473   | 13.423  | 4.813   | 65.102  | 27.858  | 137.019 | 31.040  | 68.751  | 9811.311  | 0.692   | 3.585   | 52.183  | 3.268   | 5.129   | 16.036  | 120.887 | 176.689 |
| 028-143 | 32.731 | 4.399   | 1123.600 | 66.284 | 3.998   | 0.596   | 6.790   | 0.414   | 3.783   | 3.999   | 0.392   | 19.580  | 6.930   | 90.835  | 38.263  | 182.271 | 41.180  | 82.977  | 10960.706 | 1.504   | 0.000   | 471.354 | 63.095  | 16.932  | 136.413 | 139.757 | 526.267 |
| 028-144 | 32.731 | 3.946   | 1129.607 | 66.246 | 6.708   | 0.019   | 7.057   | 0.055   | 0.828   | 2.192   | 0.452   | 16.911  | 6.583   | 89.609  | 38.157  | 186.955 | 42.072  | 86.038  | 10621.937 | 2.702   | 0.310   | 973.922 | 153.169 | 35.678  | 287.265 | 160.655 | 606.562 |
| 028-145 | 32.731 | 10.446  | 504.355  | 66.707 | 0.793   | 1.861   | 17.360  | 0.490   | 2.531   | 2.058   | 0.581   | 10.021  | 3.260   | 39.378  | 15.688  | 76.740  | 17.903  | 40.509  | 8979.648  | 0.457   | 0.209   | 55.844  | 3.556   | 5.535   | 17.148  | 123.947 | 192.536 |
| 028-146 | 32.731 | 7.312   | 2234.705 | 66.420 |         |         |         |         |         |         |         |         |         |         |         |         |         |         |           |         |         |         |         |         |         |         |         |

|         |        |         |          |        |         |         |         |         |         |         |         |         |         |         |         |         |         |         |           |         |         |         |         |         |         |         |         |
|---------|--------|---------|----------|--------|---------|---------|---------|---------|---------|---------|---------|---------|---------|---------|---------|---------|---------|---------|-----------|---------|---------|---------|---------|---------|---------|---------|---------|
| 028-147 | 32.731 | 4.961   | 995.226  | 66.687 | 8.980   | 0.014   | 16.453  | 0.078   | 1.253   | 2.594   | 0.068   | 16.984  | 6.340   | 84.172  | 34.455  | 160.944 | 34.909  | 62.665  | 10899.598 | 3.339   | 2.625   | 377.904 | 46.300  | 26.793  | 115.384 | 141.823 | 295.865 |
| 028-148 | 32.731 | 13.371  | 618.141  | 67.312 | 0.666   | 0.006   | 17.171  | 0.121   | 1.688   | 3.750   | 0.988   | 17.779  | 5.152   | 56.040  | 20.146  | 87.940  | 18.693  | 36.442  | 8625.500  | 0.342   | 0.099   | 45.638  | 2.844   | 6.523   | 15.047  | 152.016 | 155.495 |
| 028-149 | 32.731 | 6.735   | 1003.607 | 66.205 | 9.739   | 0.132   | 15.693  | 0.216   | 1.984   | 3.224   | 0.295   | 17.281  | 6.272   | 81.948  | 33.238  | 161.562 | 35.803  | 68.391  | 11667.280 | 4.027   | 5.158   | 496.793 | 61.026  | 34.593  | 151.413 | 179.221 | 427.505 |
| 028-150 | 32.731 | 10.777  | 547.803  | 67.245 | 1.848   | 0.065   | 9.348   | 0.070   | 1.245   | 2.353   | 0.074   | 11.646  | 4.052   | 49.236  | 18.614  | 84.755  | 17.182  | 31.206  | 9831.991  | 0.733   | 3.312   | 60.310  | 7.206   | 5.699   | 19.160  | 30.536  | 45.501  |
| 028-151 | 32.731 | 5.250   | 511.979  | 67.836 | 3.001   | 0.028   | 11.001  | 0.046   | 0.849   | 1.841   | 0.062   | 10.333  | 3.635   | 44.080  | 17.487  | 79.474  | 16.847  | 32.307  | 9065.614  | 1.055   | 0.000   | 270.632 | 44.967  | 14.877  | 82.956  | 64.763  | 154.534 |
| 028-152 | 32.731 | 12.346  | 497.028  | 67.003 | 2.162   | 0.000   | 9.530   | 0.053   | 1.018   | 2.037   | 0.104   | 11.486  | 3.789   | 44.691  | 16.857  | 76.292  | 15.710  | 28.177  | 9825.630  | 0.840   | 2.349   | 64.184  | 7.492   | 6.075   | 20.340  | 36.480  | 56.431  |
| 91500   | 32.659 | 2.993   | 113.258  | 66.896 | 0.530   | 0.001   | 2.115   | 0.019   | 0.160   | 0.242   | 0.167   | 1.640   | 0.734   | 9.025   | 3.789   | 19.673  | 4.891   | 10.958  | 5249.520  | 0.451   | 0.997   | 53.411  | 4.222   | 2.741   | 15.256  | 24.420  | 70.778  |
| Ple     | 32.731 | 44.305  | 237.336  | 66.803 | 2.392   | 0.012   | 1.283   | 0.047   | 0.852   | 1.451   | 0.329   | 6.127   | 2.232   | 24.827  | 7.250   | 25.183  | 4.424   | 4.581   | 10718.678 | 1.338   | 2.753   | 92.634  | 5.577   | 1.135   | 24.191  | 32.923  | 408.903 |
| GJ-1std | 32.747 | 3.296   | 246.323  | 66.928 | 1.250   | 0.000   | 12.807  | 0.025   | 0.450   | 1.123   | 0.852   | 6.178   | 1.757   | 19.262  | 6.717   | 29.086  | 6.030   | 12.820  | 6886.907  | 0.312   | 0.000   | 159.397 | 10.482  | 0.438   | 40.961  | 6.301   | 382.323 |
| GJ-1std | 32.747 | 2.898   | 244.704  | 66.407 | 1.274   | 0.004   | 12.560  | 0.000   | 0.505   | 0.981   | 0.891   | 5.970   | 1.795   | 18.784  | 6.608   | 28.642  | 6.103   | 12.858  | 6869.773  | 0.293   | 3.303   | 157.419 | 10.288  | 0.418   | 40.477  | 6.117   | 377.005 |
| SRM 610 | 70.009 | 434.000 | 450.000  | 0.059  | 419.000 | 457.000 | 448.000 | 430.000 | 431.000 | 451.000 | 461.000 | 444.000 | 443.000 | 427.000 | 449.000 | 426.000 | 420.000 | 435.000 | 432.000   | 452.000 | 426.000 | 426.000 | 426.000 | 426.000 | 426.000 | 457.200 | 461.500 |
|         |        |         |          |        |         |         |         |         |         |         |         |         |         |         |         |         |         |         |           |         |         |         |         |         |         |         |         |
|         | SiO2   | Ti      | Y        | ZrO2   | Nb      | La      | Ce      | Pr      | Nd      | Sm      | Eu      | Gd      | Tb      | Dy      | Ho      | Er      | Tm      | Lu      | Hf        | Ta      | Pb      | Pb      | Pb      | Pb      | Pb      | Th      | U       |
|         | 29.000 | 49.000  | 89.000   | 91.000 | 93.000  | 139.000 | 140.000 | 141.000 | 146.000 | 147.000 | 153.000 | 157.000 | 159.000 | 163.000 | 165.000 | 166.000 | 169.000 | 175.000 | 178.000   | 181.000 | 204.000 | 206.000 | 207.000 | 208.000 | Total   | 232.000 | 238.000 |
|         | wt%    | ppm     | ppm      | wt%    | ppm       | ppm     | ppm     | ppm     | ppm     | ppm     | ppm     | ppm     | ppm     |
| SRM 610 | 1.349  | 9.949   | 10.021   | 0.002  | 9.111   | 10.409  | 9.695   | 9.702   | 9.994   | 10.450  | 10.440  | 10.161  | 9.972   | 9.598   | 10.022  | 9.507   | 9.163   | 9.696   | 10.101    | 10.020  | 10.218  | 8.934   | 9.005   | 8.759   | 5.448   | 9.927   | 9.882   |
| GJ-1std | 0.401  | 0.460   | 4.245    | 1.157  | 0.056   | 0.006   | 0.254   | 0.006   | 0.051   | 0.106   | 0.057   | 0.253   | 0.054   | 0.439   | 0.140   | 0.570   | 0.134   | 0.253   | 114.253   | 0.024   | 1.180   | 1.870   | 0.196   | 0.026   | 0.453   | 0.121   | 6.532   |
| GJ-1std | 0.401  | 0.469   | 4.364    | 1.172  | 0.059   | 0.006   | 0.249   | 0.006   | 0.061   | 0.097   | 0.051   | 0.245   | 0.062   | 0.459   | 0.140   | 0.568   | 0.139   | 0.258   | 115.763   | 0.021   | 1.301   | 1.988   | 0.258   | 0.023   | 0.483   | 0.115   | 6.609   |
| Ple     | 0.319  | 1.179   | 3.465    | 1.087  | 0.069   | 0.005   | 0.054   | 0.007   | 0.066   | 0.094   | 0.029   | 0.226   | 0.055   | 0.488   | 0.122   | 0.455   | 0.092   | 0.097   | 174.967   | 0.043   | 1.385   | 0.885   | 0.127   | 0.035   | 0.217   | 0.482   | 6.054   |
| 91500   | 0.412  | 0.484   | 2.192    | 1.184  | 0.040   | 0.007   | 0.069   | 0.005   | 0.040   | 0.062   | 0.027   | 0.126   | 0.035   | 0.240   | 0.093   | 0.446   | 0.130   | 0.238   | 92.172    | 0.022   | 1.468   | 0.669   | 0.114   | 0.062   | 0.168   | 0.437   | 1.251   |
| 028-1   | 0.395  | 0.482   | 18.936   | 1.127  | 0.207   | 0.036   | 0.421   | 0.047   | 0.335   | 0.284   | 0.079   | 0.572   | 0.128   | 1.452   | 0.618   | 3.405   | 0.796   | 1.731   | 162.626   | 0.102   | 1.469   | 7.494   | 1.088   | 0.442   | 1.837   | 5.918   | 17.261  |
| 028-2   | 0.323  | 0.519   | 45.728   | 1.010  | 0.121   | 0.009   | 2.394   | 0.025   | 0.338   | 0.490   | 0.176   | 1.573   | 0.471   | 4.772   | 1.606   | 6.749   | 1.319   | 2.157   | 127.162   | 0.047   | 1.391   | 0.939   | 0.075   | 0.363   | 0.297   | 15.177  | 6.829   |
| 028-3   | 0.333  | 0.501   | 22.122   | 0.990  | 0.272   | 0.677   | 2.188   | 0.180   | 0.738   | 0.268   | 0.050   | 0.584   | 0.167   | 1.990   | 0.774   | 3.531   | 0.775   | 1.148   | 149.218   | 0.106   | 1.222   | 0.979   | 0.094   | 0.088   | 0.242   | 4.146   | 8.958   |
| 028-4   | 0.387  | 0.514   | 7.249    | 1.134  | 0.226   | 0.330   | 0.914   | 0.092   | 0.576   | 0.391   | 0.072   | 0.884   | 0.184   | 1.401   | 0.425   | 1.507   | 0.391   | 0.700   | 124.759   | 0.067   | 1.341   | 0.404   | 0.104   | 0.162   | 0.132   | 2.656   | 2.245   |
| 028-5   | 0.350  | 0.898   | 45.916   | 1.099  | 0.076   | 0.013   | 1.063   | 0.034   | 0.311   | 0.429   | 0.063   | 1.630   | 0.486   | 4.733   | 1.659   | 6.904   | 1.335   | 2.031   | 143.192   | 0.028   | 1.380   | 0.670   | 0.197   | 0.366   | 0.255   | 4.115   | 1.341   |
| 028-6   | 0.480  | 0.437   | 22.890   | 1.327  | 0.087   | 0.045   | 2.109   | 0.099   | 0.685   | 0.708   | 0.221   | 1.429   | 0.361   | 2.824   | 0.782   | 3.014   | 0.634   | 1.082   | 163.660   | 0.022   | 1.409   | 2.461   | 0.231   | 0.499   | 0.650   | 18.143  | 12.539  |
| 028-7   | 0.335  | 0.533   | 17.197   | 1.033  | 0.159   | 10.429  | 23.485  | 2.976   | 12.144  | 2.109   | 0.047   | 1.765   | 0.248   | 1.941   | 0.616   | 2.920   | 0.616   | 0.993   | 169.830   | 0.079   | 1.342   | 5.054   | 0.656   | 0.447   | 1.249   | 2.928   | 5.309   |
| 028-8   | 0.358  | 0.603   | 5.236    | 1.073  | 0.042   | 0.008   | 0.326   | 0.009   | 0.063   | 0.112   | 0.032   | 0.286   | 0.063   | 0.559   | 0.207   | 0.884   | 0.240   | 0.499   | 160.003   | 0.029   | 1.225   | 0.590   | 0.076   | 0.085   | 0.151   | 1.461   | 2.811   |
| 028-9   | 0.520  | 0.508   | 33.336   | 1.475  | 0.120   | 0.125   | 0.486   | 0.099   | 0.753   | 1.027   | 0.260   | 1.448   | 0.426   | 3.874   | 1.104   | 4.754   | 1.056   | 1.932   | 256.379   | 0.098   | 1.953   | 11.302  | 1.151   | 0.879   | 2.774   | 9.353   | 28.993  |
| 028-10  | 0.361  | 2.185   | 13.384   | 1.086  | 0.101   | 0.010   | 0.259   | 0.011   | 0.090   | 0.158   | 0.027   | 0.422   | 0.122   | 1.232   | 0.470   | 2.187   | 0.466   | 0.814   | 176.524   | 0.060   | 1.506   | 3.824   | 0.690   | 0.243   | 0.943   | 1.462   | 5.437   |
| SRM 610 | 1.380  | 10.434  | 10.701   | 0.002  | 9.771   | 10.863  | 10.600  | 10.023  | 10.239  | 10.802  | 10.951  | 10.493  | 10.832  | 10.711  | 11.306  | 10.520  | 10.742  | 10.380  | 10.283    | 10.472  | 12.225  | 9.401   | 9.594   | 9.503   | 5.870   | 11.979  | 10.804  |
| GJ-1std | 0.375  | 0.444   | 4.240    | 1.123  | 0.061   | 0.006   | 0.286   | 0.006   | 0.054   | 0.093   | 0.045   | 0.230   | 0.056   | 0.413   | 0.146   | 0.587   | 0.132   | 0.239   | 116.263   | 0.023   | 1.236   | 1.657   | 0.162   | 0.024   | 0.402   | 0.116   | 6.494   |
| GJ-1std | 0.382  | 0.537   | 4.083    | 1.090  | 0.059   | 0.007   | 0.264   | 0.006   | 0.058   | 0.102   | 0.044   | 0.231   | 0.052   | 0.439   | 0.133   | 0.546   | 0.132   | 0.262   | 109.937   | 0.026   | 1.462   | 1.757   | 0.174   | 0.022   | 0.426   | 0.124   | 6.399   |
| Ple     | 0.354  | 1.254   | 3.463    | 1.055  | 0.077   | 0.007   | 0.046   | 0.008   | 0.071   | 0.107   | 0.034   | 0.219   | 0.067   | 0.451   | 0.142   | 0.495   | 0.095   | 0.087   | 167.060   | 0.049   | 1.534   | 0.910   | 0.117   | 0.040   | 0.223   | 0.483   | 5.906   |
| 91500   | 0.420  | 0.492   | 2.082    | 1.144  | 0.035   | 0.008   | 0.072   | 0.004   | 0.043   | 0.059   | 0.025   | 0.148   | 0.028   | 0.261   | 0.093   | 0.444   | 0.121   | 0.231   | 89.631    | 0.026   | 1.387   | 0.671   | 0.111   | 0.069   | 0.169   | 0.436   | 1.227   |
| 028-11  | 0.354  | 0.583   | 4.291    | 1.062  | 0.088   | 0.008   | 0.079   | 0.004   | 0.035   | 0.066   | 0.017   | 0.178   | 0.044   | 0.427   | 0.155   | 0.581   | 0.146   | 0.211   | 183.947   | 0.031   | 1.324   | 7.649   | 1.091   | 0.055   | 1.859   | 0.251   | 7.345   |
| 028-12  | 0.344  | 0.379   | 3.546    | 1.065  | 0.052   | 0.007   | 0.391   | 0.008   | 0.066   | 0.125   | 0.044   | 0.297   | 0.053   | 0.450   | 0.166   | 0.699   | 0.180   | 0.358   | 137.951   | 0.024   | 1.345   | 0.648   | 0.142   | 0.131   | 0.175   | 1.220   | 3.792   |
| 028-13  | 0.333  | 0.428   | 16.132   | 1.051  | 0.046   | 0.148   | 0.577   | 0.065   | 0.385   | 0.235   | 0.046   | 0.615   | 0.173   | 1.633   | 0.554   | 2.494   | 0.475   | 0.950   | 252.471   | 0.025   | 1.387   | 10.973  | 1.720   | 1.018   | 2.724   | 4.268   | 7.683   |
| 028-14  | 0.391  | 0.449   | 15.591   | 1.155  | 0.102   | 0.008   | 0.240   | 0.011   | 0.100   | 0.201   | 0.039   | 0.473   | 0.143   | 1.485   | 0.542   | 2.643   | 0.628   | 1.233   | 151.126   | 0.046   | 1.205   | 9.485   | 1.542   | 0.383   | 2.320   | 2.305   | 8.089   |
| 028-15  | 0.414  | 0.565   | 18.424   | 1.152  | 0.115   | 0.013   | 0.420   | 0.012   | 0.098   | 0.142   | 0.029   | 0.465   | 0.128   | 1.525   | 0.617   | 3.149   | 0.736   | 1.657   | 193.766   | 0.055   | 1.298   | 7.031   | 1.106   | 0.497   | 1.732   | 5.893   | 13.326  |
| 028-16  | 0.379  | 4.901   | 19.411   | 1.145  | 0.269   | 0.009   | 0.359   | 0.012   | 0.084   | 0.182   | 0.024   | 0.466   | 0.144   | 1.684   | 0.695   | 3.242   | 0.721   | 1.405   | 175.177   | 0.099   | 1.323   | 7.753   | 1.173   | 0.484   | 1.904   | 4.244   | 11.434  |

|         |       |        |         |       |        |        |        |        |        |        |        |        |        |        |        |        |        |        |         |        |        |        |        |        |       |        |        |
|---------|-------|--------|---------|-------|--------|--------|--------|--------|--------|--------|--------|--------|--------|--------|--------|--------|--------|--------|---------|--------|--------|--------|--------|--------|-------|--------|--------|
| 028-17  | 0.404 | 0.731  | 45.474  | 1.145 | 0.218  | 0.148  | 1.409  | 0.200  | 1.331  | 1.026  | 0.325  | 2.163  | 0.533  | 5.022  | 1.554  | 6.231  | 1.328  | 2.265  | 172.966 | 0.089  | 1.223  | 4.953  | 0.335  | 0.257  | 1.204 | 14.779 | 46.670 |
| 028-18  | 0.329 | 0.540  | 7.295   | 1.014 | 0.049  | 0.019  | 0.301  | 0.009  | 0.065  | 0.114  | 0.033  | 0.255  | 0.068  | 0.638  | 0.236  | 1.238  | 0.331  | 0.674  | 158.687 | 0.031  | 1.352  | 1.155  | 0.105  | 0.106  | 0.285 | 2.769  | 5.163  |
| 028-19  | 0.561 | 1.967  | 210.793 | 1.504 | 1.243  | 1.902  | 3.945  | 0.695  | 5.300  | 5.138  | 1.685  | 10.312 | 3.206  | 30.046 | 7.689  | 27.693 | 5.688  | 9.256  | 339.773 | 0.243  | 4.568  | 9.014  | 4.068  | 4.094  | 3.183 | 32.275 | 57.908 |
| 028-20  | 0.179 | 0.703  | 5.842   | 0.669 | 0.309  | 0.034  | 0.415  | 0.017  | 0.156  | 0.215  | 0.040  | 0.511  | 0.118  | 0.932  | 0.319  | 1.529  | 0.458  | 0.978  | 182.363 | 0.112  | 2.092  | 1.394  | 0.225  | 0.204  | 0.357 | 2.432  | 9.325  |
| SRM 610 | 1.430 | 10.758 | 10.887  | 0.002 | 9.573  | 10.727 | 10.952 | 10.155 | 10.449 | 11.218 | 10.930 | 11.200 | 10.580 | 10.714 | 10.545 | 10.228 | 9.825  | 10.288 | 10.162  | 10.626 | 12.054 | 10.038 | 10.128 | 9.962  | 6.176 | 10.579 | 10.598 |
| GJ-1std | 0.380 | 0.420  | 3.907   | 1.033 | 0.055  | 0.007  | 0.234  | 0.007  | 0.056  | 0.108  | 0.051  | 0.261  | 0.057  | 0.404  | 0.132  | 0.517  | 0.118  | 0.231  | 105.445 | 0.022  | 1.435  | 1.872  | 0.199  | 0.021  | 0.454 | 0.119  | 5.860  |
| GJ-1std | 0.382 | 0.417  | 3.920   | 1.072 | 0.057  | 0.007  | 0.228  | 0.006  | 0.058  | 0.101  | 0.047  | 0.235  | 0.056  | 0.483  | 0.140  | 0.606  | 0.135  | 0.231  | 111.152 | 0.021  | 1.361  | 1.896  | 0.198  | 0.023  | 0.460 | 0.136  | 6.176  |
| Ple     | 0.356 | 1.275  | 3.265   | 1.078 | 0.069  | 0.007  | 0.052  | 0.010  | 0.061  | 0.107  | 0.034  | 0.243  | 0.063  | 0.474  | 0.142  | 0.446  | 0.096  | 0.094  | 174.020 | 0.036  | 1.597  | 0.970  | 0.111  | 0.035  | 0.237 | 0.499  | 5.912  |
| 91500   | 0.363 | 0.465  | 1.973   | 1.068 | 0.034  | 0.006  | 0.064  | 0.005  | 0.034  | 0.068  | 0.022  | 0.147  | 0.034  | 0.289  | 0.102  | 0.413  | 0.116  | 0.213  | 83.558  | 0.021  | 1.305  | 0.692  | 0.124  | 0.071  | 0.174 | 0.428  | 1.123  |
| 028-21  | 0.347 | 0.538  | 8.358   | 1.054 | 0.038  | 0.007  | 0.268  | 0.008  | 0.080  | 0.128  | 0.043  | 0.295  | 0.081  | 0.803  | 0.294  | 1.299  | 0.333  | 0.631  | 133.297 | 0.023  | 1.420  | 0.628  | 0.092  | 0.098  | 0.162 | 1.933  | 2.572  |
| 028-22  | 0.328 | 0.464  | 19.284  | 1.007 | 0.211  | 0.007  | 0.636  | 0.013  | 0.120  | 0.192  | 0.045  | 0.574  | 0.169  | 1.995  | 0.786  | 3.210  | 0.714  | 1.048  | 147.003 | 0.075  | 1.526  | 0.916  | 0.117  | 0.098  | 0.229 | 3.846  | 8.031  |
| 028-23  | 0.312 | 16.611 | 13.960  | 1.062 | 0.201  | 0.023  | 0.237  | 0.016  | 0.125  | 0.144  | 0.023  | 0.517  | 0.130  | 1.336  | 0.492  | 2.088  | 0.438  | 0.734  | 134.050 | 0.037  | 1.391  | 0.972  | 0.149  | 0.135  | 0.248 | 0.706  | 0.840  |
| 028-24  | 0.401 | 0.412  | 14.632  | 1.126 | 0.128  | 0.008  | 1.389  | 0.016  | 0.151  | 0.216  | 0.061  | 0.538  | 0.121  | 1.287  | 0.475  | 2.371  | 0.536  | 1.179  | 145.212 | 0.050  | 1.313  | 3.796  | 0.307  | 0.470  | 0.950 | 14.774 | 16.450 |
| 028-25  | 0.365 | 0.537  | 6.418   | 1.090 | 0.081  | 0.008  | 0.262  | 0.009  | 0.110  | 0.141  | 0.050  | 0.369  | 0.084  | 0.805  | 0.254  | 1.229  | 0.284  | 0.573  | 104.333 | 0.039  | 1.477  | 0.956  | 0.092  | 0.092  | 0.237 | 2.004  | 4.563  |
| SRM 610 | 1.462 | 10.912 | 11.075  | 0.002 | 10.030 | 11.196 | 10.831 | 10.489 | 10.699 | 11.412 | 11.566 | 11.531 | 10.918 | 10.956 | 11.185 | 10.615 | 10.302 | 10.850 | 11.075  | 11.085 | 12.482 | 10.137 | 9.900  | 9.823  | 6.106 | 10.931 | 10.941 |
| GJ-1std | 0.358 | 0.434  | 4.036   | 1.067 | 0.052  | 0.006  | 0.239  | 0.006  | 0.073  | 0.101  | 0.050  | 0.227  | 0.053  | 0.454  | 0.137  | 0.604  | 0.119  | 0.256  | 107.061 | 0.020  | 1.418  | 1.643  | 0.209  | 0.024  | 0.399 | 0.110  | 6.086  |
| GJ-1std | 0.351 | 0.468  | 3.990   | 1.055 | 0.056  | 0.007  | 0.254  | 0.006  | 0.051  | 0.100  | 0.047  | 0.261  | 0.055  | 0.479  | 0.137  | 0.600  | 0.130  | 0.254  | 107.301 | 0.025  | 1.438  | 1.738  | 0.221  | 0.023  | 0.422 | 0.113  | 6.017  |
| Ple     | 0.344 | 1.145  | 5.212   | 1.028 | 0.081  | 0.009  | 0.063  | 0.012  | 0.106  | 0.140  | 0.048  | 0.343  | 0.083  | 0.616  | 0.182  | 0.641  | 0.135  | 0.134  | 170.634 | 0.056  | 1.602  | 1.081  | 0.139  | 0.047  | 0.264 | 0.642  | 7.024  |
| 91500   | 0.387 | 0.489  | 1.981   | 1.044 | 0.034  | 0.007  | 0.057  | 0.005  | 0.040  | 0.058  | 0.021  | 0.140  | 0.032  | 0.257  | 0.106  | 0.444  | 0.115  | 0.224  | 81.175  | 0.027  | 1.418  | 0.721  | 0.120  | 0.076  | 0.181 | 0.412  | 1.200  |
| SRM 610 | 1.574 | 10.851 | 10.935  | 0.002 | 9.820  | 11.380 | 10.872 | 10.478 | 10.778 | 11.038 | 11.450 | 10.800 | 10.345 | 10.364 | 10.460 | 10.156 | 9.900  | 10.669 | 10.339  | 10.587 | 12.827 | 9.927  | 10.216 | 10.040 | 6.207 | 10.179 | 10.823 |
| GJ-1std | 0.389 | 0.335  | 4.183   | 1.097 | 0.047  | 0.006  | 0.221  | 0.005  | 0.045  | 0.094  | 0.043  | 0.228  | 0.050  | 0.387  | 0.138  | 0.490  | 0.122  | 0.245  | 111.126 | 0.022  | 1.029  | 1.701  | 0.155  | 0.022  | 0.412 | 0.114  | 6.031  |
| GJ-1std | 0.388 | 0.365  | 4.064   | 1.059 | 0.050  | 0.005  | 0.235  | 0.006  | 0.048  | 0.093  | 0.040  | 0.244  | 0.054  | 0.374  | 0.140  | 0.483  | 0.118  | 0.233  | 107.810 | 0.018  | 1.238  | 1.732  | 0.168  | 0.020  | 0.420 | 0.117  | 5.899  |
| Ple     | 0.365 | 1.404  | 6.856   | 1.095 | 0.089  | 0.007  | 0.076  | 0.010  | 0.096  | 0.138  | 0.040  | 0.338  | 0.087  | 0.856  | 0.252  | 0.769  | 0.151  | 0.142  | 180.611 | 0.064  | 1.447  | 1.405  | 0.141  | 0.049  | 0.342 | 0.869  | 8.949  |
| 91500   | 0.470 | 0.369  | 1.959   | 1.130 | 0.033  | 0.031  | 0.116  | 0.015  | 0.084  | 0.070  | 0.025  | 0.125  | 0.034  | 0.256  | 0.106  | 0.412  | 0.127  | 0.226  | 90.272  | 0.025  | 1.196  | 0.812  | 0.111  | 0.068  | 0.201 | 0.443  | 1.284  |
| 028-26  | 0.335 | 0.524  | 10.435  | 1.090 | 0.104  | 0.005  | 0.825  | 0.014  | 0.119  | 0.194  | 0.044  | 0.473  | 0.130  | 1.209  | 0.450  | 1.641  | 0.366  | 0.587  | 150.165 | 0.050  | 1.431  | 0.343  | 0.064  | 0.073  | 0.094 | 1.607  | 2.705  |
| 028-27  | 0.364 | 0.339  | 16.289  | 1.099 | 0.171  | 0.008  | 0.273  | 0.008  | 0.076  | 0.128  | 0.013  | 0.412  | 0.111  | 1.368  | 0.539  | 2.715  | 0.642  | 1.159  | 212.643 | 0.102  | 1.197  | 8.170  | 1.032  | 0.438  | 1.995 | 3.137  | 7.878  |
| 028-28  | 0.398 | 0.465  | 18.894  | 1.038 | 0.063  | 0.037  | 0.423  | 0.083  | 0.642  | 2.408  | 0.243  | 1.199  | 0.335  | 2.540  | 0.663  | 2.588  | 0.582  | 1.439  | 260.549 | 0.020  | 1.381  | 3.659  | 0.354  | 0.252  | 0.895 | 14.578 | 30.301 |
| 028-29  | 0.367 | 0.417  | 12.349  | 1.074 | 0.135  | 0.019  | 0.203  | 0.014  | 0.094  | 0.104  | 0.031  | 0.315  | 0.085  | 0.850  | 0.439  | 2.354  | 0.637  | 1.656  | 153.929 | 0.058  | 1.199  | 2.788  | 0.519  | 0.308  | 0.701 | 1.070  | 6.407  |
| 028-30  | 0.360 | 0.449  | 12.515  | 1.059 | 0.039  | 0.007  | 0.119  | 0.008  | 0.099  | 0.192  | 0.020  | 0.744  | 0.219  | 1.711  | 0.485  | 1.495  | 0.264  | 0.317  | 170.678 | 0.028  | 1.162  | 1.423  | 0.150  | 0.289  | 0.377 | 3.485  | 2.892  |
| 028-31  | 0.354 | 0.464  | 11.778  | 1.099 | 0.032  | 0.007  | 0.254  | 0.010  | 0.086  | 0.127  | 0.048  | 0.408  | 0.111  | 1.156  | 0.414  | 1.789  | 0.390  | 0.758  | 156.269 | 0.028  | 1.288  | 0.453  | 0.101  | 0.123  | 0.130 | 2.612  | 2.098  |
| 028-32  | 0.392 | 0.338  | 18.515  | 1.098 | 0.252  | 0.145  | 0.913  | 0.152  | 1.089  | 0.420  | 0.032  | 4.677  | 0.164  | 1.629  | 0.634  | 2.996  | 0.661  | 1.284  | 193.307 | 0.102  | 1.286  | 5.170  | 0.669  | 0.501  | 1.282 | 3.604  | 5.418  |
| 028-33  | 0.443 | 0.665  | 88.636  | 1.275 | 0.111  | 0.317  | 3.610  | 0.367  | 2.738  | 2.705  | 0.813  | 4.882  | 1.398  | 12.364 | 3.401  | 12.630 | 2.530  | 4.246  | 152.359 | 0.039  | 1.312  | 5.957  | 0.467  | 0.790  | 1.498 | 29.364 | 28.382 |
| 028-34  | 0.354 | 0.666  | 16.742  | 1.057 | 0.058  | 0.011  | 0.227  | 0.026  | 0.254  | 0.273  | 0.046  | 0.815  | 0.188  | 1.851  | 0.642  | 2.635  | 0.521  | 0.834  | 145.153 | 0.025  | 1.365  | 1.210  | 0.368  | 0.350  | 0.354 | 0.905  | 0.959  |
| 028-35  | 0.386 | 0.340  | 19.237  | 1.159 | 0.081  | 0.101  | 1.010  | 0.022  | 0.130  | 0.142  | 0.046  | 0.422  | 0.146  | 1.678  | 0.625  | 3.000  | 0.749  | 1.543  | 184.749 | 0.047  | 1.111  | 2.947  | 0.235  | 0.350  | 0.736 | 11.157 | 14.427 |
| SRM 610 | 1.493 | 10.614 | 10.678  | 0.002 | 9.370  | 10.740 | 10.594 | 10.037 | 10.370 | 10.595 | 10.929 | 10.270 | 10.373 | 10.115 | 10.422 | 10.257 | 9.930  | 10.315 | 10.186  | 10.263 | 11.822 | 9.713  | 9.669  | 9.604  | 5.950 | 10.446 | 10.175 |
| GJ-1std | 0.369 | 0.343  | 4.139   | 1.136 | 0.044  | 0.006  | 0.255  | 0.006  | 0.052  | 0.092  | 0.045  | 0.186  | 0.048  | 0.403  | 0.138  | 0.546  | 0.126  | 0.251  | 116.886 | 0.020  | 1.356  | 1.848  | 0.183  | 0.020  | 0.448 | 0.126  | 6.466  |
| GJ-1std | 0.368 | 0.360  | 3.955   | 1.043 | 0.045  | 0.005  | 0.246  | 0.006  | 0.042  | 0.089  | 0.045  | 0.250  | 0.048  | 0.401  | 0.181  | 0.550  | 0.129  | 0.232  | 104.579 | 0.022  | 1.421  | 1.671  | 0.187  | 0.036  | 0.406 | 0.117  | 5.928  |
| Ple     | 0.365 | 1.354  | 6.184   | 1.082 | 0.081  | 0.008  | 0.057  | 0.010  | 0.103  | 0.153  | 0.046  | 0.350  | 0.090  | 0.865  | 0.254  | 0.819  | 0.160  | 0.146  | 181.572 | 0.063  | 1.532  | 1.561  | 0.161  | 0.052  | 0.379 | 0.845  | 9.354  |
| 91500   | 0.420 | 0.379  | 1.972   | 1.056 | 0.027  | 0.067  | 0.067  | 0.005  | 0.035  | 0.054  | 0.024  | 0.128  | 0.029  | 0.255  | 0.090  | 0.410  | 0.150  | 0.246  | 84.792  | 0.023  | 6.347  | 0.715  | 0.113  | 0.066  | 0.199 | 0.451  | 1.230  |
| 028-36  | 0.393 | 0.547  | 23.387  | 1.133 | 0.134  | 2.344  | 3.051  | 0.973  | 3.665  | 0.539  | 0.086  | 0.837  | 0.229  | 2.472  | 0.859  | 3.825  | 0.842  | 1.496  | 156.104 | 0.059  | 1.351  | 1.251  | 0.114  | 0.138  | 0.312 | 7.300  | 10.430 |
| 028-37  | 0.345 | 0.361  | 5.035   | 1.091 | 0.038  | 0.007  | 0.194  | 0.007  | 0.049  | 0.101  | 0.030  | 0.223  | 0.055  | 0.535  | 0.200  | 0.930  | 0.242  | 0.486  | 202.494 | 0.033  | 1.521  | 0.850  | 0.119  | 0.126  | 0.218 | 2.117  | 3.178  |

|         |       |        |        |       |       |        |        |        |        |        |        |        |        |        |        |        |        |        |         |        |        |        |       |       |       |        |        |
|---------|-------|--------|--------|-------|-------|--------|--------|--------|--------|--------|--------|--------|--------|--------|--------|--------|--------|--------|---------|--------|--------|--------|-------|-------|-------|--------|--------|
| 028-38  | 0.422 | 0.377  | 32.729 | 1.230 | 0.149 | 0.022  | 1.863  | 0.047  | 0.296  | 0.380  | 0.114  | 0.838  | 0.275  | 3.030  | 1.202  | 5.905  | 1.364  | 2.743  | 189.116 | 0.075  | 1.263  | 6.107  | 0.410 | 0.778 | 1.530 | 24.994 | 28.104 |
| 028-39  | 0.336 | 0.421  | 4.508  | 1.025 | 0.027 | 0.005  | 0.197  | 0.007  | 0.066  | 0.115  | 0.034  | 0.270  | 0.063  | 0.505  | 0.205  | 0.945  | 0.224  | 0.531  | 165.232 | 0.025  | 1.458  | 1.017  | 0.110 | 0.097 | 0.252 | 2.253  | 4.422  |
| 028-40  | 0.367 | 0.369  | 22.205 | 1.096 | 0.030 | 2.477  | 5.258  | 0.562  | 2.297  | 0.353  | 0.040  | 0.612  | 0.182  | 2.096  | 0.829  | 3.726  | 0.820  | 1.499  | 182.695 | 0.028  | 1.418  | 11.198 | 2.221 | 0.921 | 2.785 | 4.227  | 6.815  |
| 028-41  | 0.326 | 0.444  | 7.404  | 1.007 | 0.059 | 0.007  | 0.337  | 0.011  | 0.116  | 0.162  | 0.025  | 0.360  | 0.104  | 0.894  | 0.333  | 1.398  | 0.262  | 0.449  | 177.560 | 0.036  | 1.248  | 2.639  | 0.418 | 0.283 | 0.660 | 1.943  | 2.381  |
| 028-42  | 0.379 | 0.815  | 40.404 | 1.148 | 0.097 | 0.101  | 1.680  | 0.040  | 0.300  | 0.393  | 0.107  | 1.573  | 0.457  | 4.676  | 1.682  | 6.836  | 1.328  | 2.145  | 135.212 | 0.052  | 1.825  | 0.856  | 0.352 | 0.296 | 0.271 | 10.500 | 10.140 |
| 028-43  | 0.349 | 0.573  | 4.923  | 1.039 | 0.026 | 0.006  | 0.256  | 0.008  | 0.080  | 0.128  | 0.030  | 0.324  | 0.062  | 0.612  | 0.250  | 0.870  | 0.203  | 0.418  | 147.190 | 0.022  | 1.335  | 0.436  | 0.091 | 0.098 | 0.120 | 1.649  | 2.135  |
| 028-44  | 0.371 | 58.362 | 4.200  | 1.120 | 0.326 | 0.018  | 0.238  | 0.011  | 0.103  | 0.147  | 0.040  | 0.334  | 0.079  | 0.723  | 0.223  | 0.855  | 0.210  | 0.384  | 164.515 | 0.029  | 1.776  | 1.336  | 0.996 | 1.034 | 0.668 | 0.720  | 1.338  |
| 028-45  | 0.356 | 0.340  | 10.397 | 1.010 | 0.103 | 0.048  | 0.304  | 0.018  | 0.130  | 0.146  | 0.031  | 0.426  | 0.129  | 1.329  | 0.488  | 2.242  | 0.473  | 0.778  | 180.299 | 0.062  | 1.386  | 11.535 | 2.334 | 0.720 | 2.853 | 1.119  | 3.274  |
| SRM 610 | 1.569 | 13.827 | 10.835 | 0.002 | 9.699 | 10.874 | 10.545 | 10.312 | 10.512 | 11.142 | 11.170 | 10.912 | 10.636 | 10.573 | 10.556 | 10.266 | 10.212 | 10.414 | 10.404  | 10.828 | 12.047 | 9.776  | 9.820 | 9.501 | 5.923 | 10.064 | 10.056 |
| GJ-1std | 0.409 | 0.315  | 4.366  | 1.173 | 0.041 | 0.006  | 0.256  | 0.006  | 0.052  | 0.098  | 0.044  | 0.223  | 0.054  | 0.434  | 0.143  | 0.572  | 0.143  | 0.235  | 131.971 | 0.022  | 1.481  | 1.727  | 0.211 | 0.025 | 0.420 | 0.136  | 6.991  |
| GJ-1    | 0.373 | 0.346  | 4.460  | 1.155 | 0.049 | 0.006  | 0.272  | 0.005  | 0.059  | 0.098  | 0.042  | 0.259  | 0.064  | 0.488  | 0.166  | 0.652  | 0.155  | 0.308  | 142.187 | 0.027  | 1.680  | 2.305  | 0.228 | 0.041 | 0.559 | 0.175  | 8.611  |
| Ple     | 0.408 | 1.490  | 6.617  | 1.207 | 0.095 | 0.009  | 0.067  | 0.012  | 0.113  | 0.180  | 0.053  | 0.357  | 0.110  | 0.978  | 0.276  | 0.881  | 0.152  | 0.183  | 235.300 | 0.068  | 1.514  | 1.709  | 0.181 | 0.068 | 0.416 | 1.096  | 11.252 |
| 91500   | 0.393 | 0.420  | 2.101  | 1.150 | 0.032 | 0.007  | 0.072  | 0.005  | 0.037  | 0.065  | 0.022  | 0.131  | 0.034  | 0.264  | 0.112  | 0.465  | 0.130  | 0.241  | 103.261 | 0.027  | 1.484  | 0.896  | 0.138 | 0.082 | 0.223 | 0.633  | 1.678  |
| SRM 610 | 1.301 | 9.134  | 9.554  | 0.002 | 8.459 | 9.936  | 9.425  | 9.325  | 9.152  | 9.759  | 9.922  | 9.904  | 10.048 | 9.780  | 10.438 | 9.584  | 9.438  | 9.463  | 9.374   | 9.682  | 10.958 | 8.415  | 8.218 | 8.380 | 5.169 | 10.555 | 9.588  |
| GJ-1std | 0.400 | 0.319  | 4.196  | 1.167 | 0.048 | 0.006  | 0.257  | 0.004  | 0.057  | 0.099  | 0.041  | 0.217  | 0.043  | 0.459  | 0.127  | 0.586  | 0.137  | 0.245  | 110.367 | 0.018  | 1.124  | 1.874  | 0.181 | 0.024 | 0.454 | 0.119  | 6.086  |
| GJ-1std | 0.393 | 0.328  | 3.939  | 1.106 | 0.049 | 0.005  | 0.240  | 0.004  | 0.051  | 0.103  | 0.040  | 0.200  | 0.047  | 0.362  | 0.138  | 0.540  | 0.125  | 0.231  | 110.493 | 0.019  | 1.195  | 1.783  | 0.177 | 0.023 | 0.432 | 0.110  | 5.795  |
| Ple     | 0.381 | 1.579  | 6.986  | 1.152 | 0.085 | 0.008  | 0.059  | 0.011  | 0.087  | 0.137  | 0.042  | 0.367  | 0.095  | 0.876  | 0.232  | 0.729  | 0.154  | 0.144  | 179.412 | 0.067  | 1.528  | 1.545  | 0.151 | 0.053 | 0.376 | 0.823  | 9.200  |
| 91500   | 0.345 | 0.387  | 1.853  | 1.016 | 0.026 | 0.006  | 0.062  | 0.004  | 0.036  | 0.060  | 0.023  | 0.123  | 0.029  | 0.214  | 0.079  | 0.432  | 0.121  | 0.208  | 79.304  | 0.023  | 1.374  | 0.603  | 0.087 | 0.057 | 0.151 | 0.377  | 1.051  |
| 028-46  | 0.345 | 0.455  | 1.458  | 1.071 | 0.028 | 0.005  | 0.032  | 0.008  | 0.084  | 0.174  | 0.018  | 0.428  | 0.072  | 0.353  | 0.081  | 0.234  | 0.054  | 0.066  | 185.890 | 0.019  | 1.212  | 2.206  | 0.363 | 0.146 | 0.543 | 0.733  | 1.927  |
| 028-47  | 0.412 | 0.431  | 61.331 | 1.237 | 0.194 | 0.015  | 1.817  | 0.035  | 0.341  | 0.531  | 0.118  | 1.943  | 0.620  | 6.741  | 2.351  | 9.593  | 1.948  | 2.952  | 145.124 | 0.070  | 1.345  | 2.169  | 0.201 | 0.290 | 0.546 | 16.057 | 18.403 |
| 028-48  | 0.361 | 0.453  | 20.730 | 1.089 | 0.098 | 0.006  | 1.307  | 0.009  | 0.114  | 0.174  | 0.039  | 0.629  | 0.187  | 1.881  | 0.710  | 3.072  | 0.676  | 1.178  | 121.897 | 0.044  | 1.257  | 0.696  | 0.063 | 0.091 | 0.176 | 3.687  | 5.475  |
| 028-49  | 0.341 | 0.351  | 8.751  | 1.047 | 0.097 | 0.006  | 0.191  | 0.007  | 0.094  | 0.165  | 0.018  | 0.474  | 0.110  | 1.158  | 0.382  | 1.635  | 0.369  | 0.642  | 124.446 | 0.051  | 1.176  | 1.729  | 0.334 | 0.237 | 0.441 | 0.994  | 1.412  |
| 028-50  | 0.382 | 0.460  | 14.134 | 1.148 | 0.041 | 0.007  | 0.351  | 0.009  | 0.113  | 0.147  | 0.044  | 0.422  | 0.123  | 1.253  | 0.479  | 2.223  | 0.493  | 1.003  | 163.866 | 0.033  | 1.178  | 0.994  | 0.124 | 0.184 | 0.260 | 3.498  | 4.867  |
| 028-51  | 0.372 | 0.356  | 33.855 | 1.138 | 0.124 | 0.006  | 0.340  | 0.013  | 0.174  | 0.276  | 0.019  | 0.909  | 0.290  | 3.390  | 1.266  | 5.791  | 1.150  | 1.931  | 180.120 | 0.062  | 1.162  | 5.601  | 0.778 | 0.531 | 1.389 | 3.988  | 6.222  |
| 028-52  | 0.339 | 0.446  | 7.718  | 1.021 | 0.036 | 0.007  | 0.294  | 0.008  | 0.074  | 0.127  | 0.033  | 0.324  | 0.082  | 0.752  | 0.287  | 1.167  | 0.288  | 0.625  | 144.718 | 0.029  | 1.172  | 0.790  | 0.095 | 0.105 | 0.200 | 2.166  | 3.494  |
| 028-53  | 0.364 | 0.423  | 3.276  | 1.111 | 0.030 | 0.005  | 0.108  | 0.005  | 0.051  | 0.076  | 0.019  | 0.257  | 0.062  | 0.478  | 0.169  | 0.707  | 0.191  | 0.317  | 158.923 | 0.024  | 1.213  | 0.196  | 0.051 | 0.042 | 0.056 | 0.227  | 0.450  |
| 028-54  | 0.425 | 0.446  | 15.624 | 1.188 | 0.030 | 0.557  | 1.038  | 0.135  | 0.628  | 0.153  | 0.048  | 0.380  | 0.120  | 1.235  | 0.496  | 2.436  | 0.589  | 1.540  | 178.496 | 0.026  | 1.246  | 14.816 | 2.283 | 1.206 | 3.661 | 6.549  | 10.729 |
| 028-55  | 0.331 | 0.391  | 11.029 | 1.026 | 0.067 | 0.007  | 0.348  | 0.010  | 0.088  | 0.136  | 0.034  | 0.385  | 0.114  | 1.040  | 0.397  | 1.833  | 0.391  | 0.690  | 155.944 | 0.038  | 1.280  | 3.819  | 0.653 | 0.422 | 0.958 | 2.395  | 3.354  |
| SRM 610 | 1.363 | 9.164  | 9.714  | 0.002 | 8.811 | 9.871  | 9.921  | 9.343  | 9.536  | 9.655  | 9.963  | 10.077 | 9.015  | 9.236  | 9.148  | 8.910  | 8.589  | 9.282  | 9.167   | 9.309  | 10.990 | 8.683  | 8.685 | 8.638 | 5.345 | 8.896  | 9.413  |
| GJ-1std | 0.381 | 0.388  | 3.903  | 1.114 | 0.046 | 0.007  | 0.268  | 0.006  | 0.051  | 0.094  | 0.042  | 0.211  | 0.054  | 0.376  | 0.134  | 0.565  | 0.116  | 0.244  | 107.149 | 0.021  | 1.267  | 1.789  | 0.182 | 0.020 | 0.433 | 0.107  | 5.988  |
| GJ-1std | 0.411 | 0.324  | 3.887  | 1.124 | 0.045 | 0.006  | 0.233  | 0.005  | 0.053  | 0.085  | 0.044  | 0.223  | 0.046  | 0.445  | 0.130  | 0.525  | 0.123  | 0.215  | 106.848 | 0.022  | 1.329  | 1.870  | 0.161 | 0.024 | 0.453 | 0.106  | 5.780  |
| Ple     | 0.350 | 1.407  | 5.852  | 1.064 | 0.084 | 0.007  | 0.046  | 0.011  | 0.095  | 0.135  | 0.043  | 0.305  | 0.091  | 0.788  | 0.198  | 0.708  | 0.142  | 0.145  | 174.029 | 0.058  | 1.450  | 2.076  | 0.150 | 0.055 | 0.503 | 0.726  | 8.284  |
| 91500   | 0.364 | 0.398  | 1.836  | 1.005 | 0.034 | 0.005  | 0.066  | 0.004  | 0.032  | 0.053  | 0.021  | 0.115  | 0.027  | 0.226  | 0.087  | 0.385  | 0.103  | 0.188  | 75.116  | 0.023  | 1.243  | 0.628  | 0.096 | 0.065 | 0.158 | 0.359  | 1.013  |
| 028-56  | 0.361 | 0.387  | 18.428 | 1.042 | 0.116 | 0.024  | 0.192  | 0.030  | 0.177  | 0.158  | 0.046  | 0.419  | 0.133  | 1.560  | 0.689  | 3.157  | 0.717  | 1.406  | 155.342 | 0.054  | 1.171  | 8.481  | 1.139 | 0.420 | 2.071 | 2.978  | 9.096  |
| 028-57  | 0.617 | 0.471  | 17.501 | 1.202 | 0.109 | 0.005  | 0.165  | 0.008  | 0.068  | 0.119  | 0.031  | 0.407  | 0.135  | 1.417  | 0.575  | 2.880  | 0.656  | 1.255  | 157.518 | 0.056  | 1.224  | 9.587  | 1.622 | 0.404 | 2.348 | 2.695  | 9.051  |
| 028-58  | 0.406 | 0.491  | 34.706 | 1.207 | 0.172 | 0.267  | 0.968  | 0.168  | 1.048  | 0.501  | 0.060  | 1.099  | 0.288  | 3.186  | 1.248  | 5.534  | 1.201  | 2.071  | 172.458 | 0.087  | 1.327  | 11.916 | 1.274 | 0.873 | 2.922 | 6.502  | 12.219 |
| 028-59  | 0.372 | 0.552  | 25.025 | 1.178 | 0.069 | 0.008  | 0.334  | 0.009  | 0.080  | 0.183  | 0.028  | 0.674  | 0.227  | 2.395  | 0.891  | 3.881  | 0.785  | 1.317  | 168.019 | 0.036  | 1.329  | 3.659  | 0.469 | 0.582 | 0.939 | 4.322  | 3.864  |
| 028-60  | 0.354 | 0.668  | 15.741 | 1.133 | 0.042 | 0.024  | 0.131  | 0.023  | 0.256  | 0.295  | 0.044  | 0.697  | 0.180  | 1.823  | 0.596  | 2.316  | 0.471  | 0.749  | 145.452 | 0.026  | 1.500  | 0.563  | 0.115 | 0.110 | 0.151 | 0.543  | 0.503  |
| 028-61  | 0.338 | 0.534  | 12.070 | 1.097 | 0.079 | 0.006  | 0.286  | 0.011  | 0.114  | 0.178  | 0.020  | 0.474  | 0.121  | 1.334  | 0.461  | 1.829  | 0.395  | 0.661  | 152.293 | 0.042  | 1.404  | 1.224  | 0.211 | 0.176 | 0.313 | 1.078  | 1.221  |
| 028-62  | 0.353 | 0.396  | 6.615  | 1.108 | 0.096 | 0.006  | 0.280  | 0.006  | 0.058  | 0.084  | 0.020  | 0.221  | 0.051  | 0.565  | 0.232  | 1.240  | 0.318  | 0.687  | 189.571 | 0.079  | 1.322  | 2.415  | 0.302 | 0.301 | 0.607 | 2.559  | 3.301  |
| 028-63  | 0.371 | 0.531  | 14.460 | 1.129 | 0.115 | 0.071  | 1.061  | 0.085  | 1.128  | 0.696  | 0.330  | 0.961  | 0.160  | 1.380  | 0.567  | 2.222  | 0.472  | 0.746  | 115.183 | 0.057  | 1.446  | 2.016  | 0.469 | 0.214 | 0.510 | 3.547  | 4.358  |

|         |       |       |         |       |       |       |        |       |        |        |        |        |        |         |        |         |        |        |         |       |        |        |       |       |       |         |         |
|---------|-------|-------|---------|-------|-------|-------|--------|-------|--------|--------|--------|--------|--------|---------|--------|---------|--------|--------|---------|-------|--------|--------|-------|-------|-------|---------|---------|
| 028-64  | 0.391 | 0.413 | 5.014   | 1.202 | 0.051 | 0.009 | 1.002  | 0.014 | 0.112  | 0.211  | 0.074  | 0.453  | 0.144  | 1.043   | 0.227  | 0.893   | 0.289  | 1.016  | 159.443 | 0.026 | 1.242  | 5.277  | 0.307 | 0.428 | 1.293 | 9.885   | 20.323  |
| 028-65  | 0.368 | 0.398 | 51.051  | 1.128 | 0.094 | 0.023 | 2.160  | 0.027 | 0.379  | 0.564  | 0.146  | 2.024  | 0.567  | 5.543   | 1.827  | 7.304   | 1.423  | 2.189  | 126.662 | 0.043 | 1.474  | 2.572  | 0.174 | 0.579 | 0.691 | 22.673  | 14.284  |
| SRM 610 | 1.324 | 9.735 | 9.578   | 0.002 | 8.560 | 9.639 | 9.415  | 9.276 | 9.264  | 9.130  | 9.897  | 9.788  | 9.512  | 9.432   | 9.216  | 8.995   | 8.642  | 9.099  | 9.299   | 9.262 | 11.165 | 8.527  | 8.474 | 8.604 | 5.299 | 9.438   | 9.459   |
| GJ-1std | 0.407 | 0.393 | 4.040   | 1.108 | 0.048 | 0.008 | 0.231  | 0.006 | 0.063  | 0.083  | 0.042  | 0.225  | 0.048  | 0.402   | 0.134  | 0.524   | 0.142  | 0.242  | 110.304 | 0.018 | 1.392  | 1.835  | 0.186 | 0.020 | 0.445 | 0.122   | 6.145   |
| GJ-1std | 0.387 | 0.402 | 3.977   | 1.102 | 0.049 | 0.006 | 0.235  | 0.005 | 0.049  | 0.088  | 0.045  | 0.214  | 0.052  | 0.389   | 0.130  | 0.525   | 0.119  | 0.234  | 107.193 | 0.020 | 1.170  | 1.796  | 0.181 | 0.022 | 0.435 | 0.113   | 6.186   |
| Ple     | 0.373 | 1.464 | 6.190   | 1.072 | 0.100 | 0.008 | 0.054  | 0.013 | 0.115  | 0.139  | 0.047  | 0.343  | 0.087  | 0.755   | 0.226  | 0.755   | 0.142  | 0.143  | 176.008 | 0.058 | 1.461  | 1.446  | 0.164 | 0.050 | 0.352 | 0.812   | 8.648   |
| 91500   | 0.365 | 0.382 | 1.922   | 1.099 | 0.030 | 0.006 | 0.062  | 0.005 | 0.039  | 0.058  | 0.018  | 0.135  | 0.029  | 0.244   | 0.095  | 0.399   | 0.107  | 0.191  | 83.059  | 0.023 | 1.255  | 0.654  | 0.099 | 0.062 | 0.163 | 0.406   | 1.143   |
| 028-66  | 0.351 | 8.259 | 875.932 | 1.220 | 2.160 | 0.855 | 42.508 | 2.856 | 24.371 | 28.097 | 9.611  | 56.119 | 16.152 | 131.591 | 32.185 | 107.717 | 19.792 | 21.588 | 168.141 | 0.365 | 3.001  | 4.786  | 2.481 | 2.894 | 1.983 | 187.452 | 123.687 |
| 028-67  | 0.339 | 0.452 | 7.726   | 1.064 | 0.077 | 0.006 | 0.180  | 0.006 | 0.051  | 0.089  | 0.014  | 0.219  | 0.087  | 0.730   | 0.266  | 1.225   | 0.277  | 0.481  | 136.538 | 0.046 | 1.317  | 1.034  | 0.360 | 0.144 | 0.273 | 0.624   | 0.826   |
| 028-68  | 0.381 | 0.460 | 23.453  | 1.159 | 0.036 | 0.010 | 0.398  | 0.019 | 0.211  | 0.230  | 0.057  | 0.802  | 0.214  | 2.304   | 0.763  | 3.320   | 0.672  | 1.105  | 135.914 | 0.029 | 1.268  | 15.428 | 2.875 | 2.547 | 4.001 | 11.975  | 10.185  |
| 028-69  | 0.358 | 0.584 | 4.062   | 1.092 | 0.046 | 0.006 | 0.332  | 0.010 | 0.098  | 0.136  | 0.030  | 0.314  | 0.079  | 0.540   | 0.206  | 0.734   | 0.197  | 0.362  | 169.939 | 0.030 | 1.132  | 0.585  | 0.116 | 0.134 | 0.160 | 1.312   | 2.803   |
| 028-70  | 0.343 | 0.460 | 23.342  | 1.074 | 0.092 | 0.009 | 0.572  | 0.015 | 0.136  | 0.243  | 0.047  | 0.709  | 0.213  | 2.231   | 0.818  | 3.552   | 0.742  | 1.296  | 113.601 | 0.041 | 1.395  | 0.887  | 0.091 | 0.132 | 0.226 | 5.231   | 7.041   |
| 028-71  | 0.366 | 0.428 | 8.041   | 1.109 | 0.035 | 0.007 | 0.061  | 0.005 | 0.038  | 0.082  | 0.019  | 0.334  | 0.110  | 1.108   | 0.272  | 0.999   | 0.151  | 0.386  | 178.691 | 0.030 | 1.008  | 3.995  | 0.391 | 0.106 | 0.968 | 0.816   | 10.954  |
| 028-72  | 0.357 | 0.469 | 5.599   | 1.065 | 0.052 | 0.005 | 0.169  | 0.006 | 0.058  | 0.088  | 0.020  | 0.218  | 0.067  | 0.620   | 0.211  | 0.907   | 0.214  | 0.361  | 150.259 | 0.037 | 1.149  | 0.575  | 0.136 | 0.109 | 0.154 | 1.173   | 1.802   |
| 028-73  | 0.329 | 0.383 | 7.648   | 1.086 | 0.038 | 0.006 | 0.289  | 0.006 | 0.046  | 0.071  | 0.024  | 0.212  | 0.064  | 0.675   | 0.257  | 1.220   | 0.321  | 0.689  | 164.751 | 0.027 | 1.193  | 0.872  | 0.113 | 0.107 | 0.220 | 2.277   | 4.045   |
| 028-74  | 0.348 | 0.568 | 9.734   | 1.071 | 0.063 | 0.005 | 0.823  | 0.010 | 0.211  | 0.145  | 0.051  | 0.434  | 0.116  | 1.108   | 0.370  | 1.407   | 0.321  | 0.580  | 122.081 | 0.036 | 1.323  | 0.227  | 0.050 | 0.167 | 0.105 | 1.661   | 1.940   |
| 028-75  | 0.429 | 0.371 | 30.370  | 1.186 | 0.427 | 0.024 | 0.311  | 0.037 | 0.330  | 0.606  | 0.217  | 1.387  | 0.370  | 3.676   | 1.230  | 4.905   | 1.006  | 1.753  | 257.023 | 0.205 | 1.460  | 9.399  | 1.101 | 0.449 | 2.290 | 8.424   | 14.396  |
| SRM 610 | 1.259 | 9.843 | 9.624   | 0.002 | 8.694 | 9.653 | 9.360  | 9.034 | 9.561  | 9.483  | 10.169 | 9.971  | 10.235 | 9.878   | 10.219 | 9.693   | 9.461  | 9.576  | 9.269   | 9.536 | 11.751 | 8.776  | 8.795 | 8.489 | 5.297 | 10.644  | 9.761   |
| GJ-1std | 0.398 | 0.364 | 4.242   | 1.127 | 0.051 | 0.007 | 0.231  | 0.005 | 0.053  | 0.098  | 0.041  | 0.217  | 0.049  | 0.462   | 0.136  | 0.599   | 0.131  | 0.241  | 112.732 | 0.022 | 1.289  | 1.880  | 0.185 | 0.023 | 0.455 | 0.111   | 6.083   |
| GJ-1std | 0.402 | 8.585 | 4.047   | 1.131 | 0.043 | 0.006 | 0.241  | 0.006 | 0.045  | 0.086  | 0.047  | 0.243  | 0.054  | 0.419   | 0.140  | 0.584   | 0.115  | 0.236  | 116.045 | 0.020 | 1.258  | 1.840  | 0.183 | 0.022 | 0.446 | 0.118   | 6.239   |
| Ple     | 0.390 | 1.373 | 6.466   | 1.124 | 0.086 | 0.008 | 0.054  | 0.011 | 0.115  | 0.148  | 0.048  | 0.317  | 0.092  | 0.834   | 0.230  | 0.733   | 0.148  | 0.150  | 179.914 | 0.061 | 1.453  | 1.471  | 0.178 | 0.048 | 0.358 | 0.804   | 8.903   |
| 91500   | 0.388 | 0.382 | 2.031   | 1.157 | 0.026 | 0.006 | 0.065  | 0.004 | 0.033  | 0.047  | 0.023  | 0.138  | 0.029  | 0.245   | 0.096  | 0.397   | 0.120  | 0.207  | 89.090  | 0.022 | 1.401  | 0.696  | 0.106 | 0.065 | 0.174 | 0.411   | 1.152   |
| 028-76  | 0.349 | 0.365 | 22.333  | 1.038 | 0.098 | 0.007 | 0.327  | 0.008 | 0.100  | 0.178  | 0.040  | 0.594  | 0.165  | 2.025   | 0.823  | 3.690   | 0.805  | 1.501  | 112.212 | 0.031 | 1.308  | 7.748  | 1.252 | 0.735 | 1.927 | 4.240   | 6.178   |
| 028-77  | 0.369 | 0.403 | 23.372  | 1.076 | 0.204 | 4.008 | 9.068  | 1.035 | 4.472  | 0.908  | 0.091  | 0.743  | 0.163  | 1.847   | 0.747  | 3.855   | 0.921  | 1.987  | 155.578 | 0.092 | 1.347  | 1.332  | 0.139 | 0.107 | 0.328 | 3.327   | 11.967  |
| 028-78  | 0.339 | 0.542 | 14.465  | 1.074 | 0.032 | 0.007 | 0.191  | 0.009 | 0.122  | 0.211  | 0.047  | 0.724  | 0.171  | 1.542   | 0.525  | 1.969   | 0.355  | 0.498  | 149.134 | 0.021 | 1.511  | 0.679  | 0.080 | 0.246 | 0.210 | 4.616   | 1.585   |
| 028-79  | 0.343 | 0.442 | 9.528   | 1.056 | 0.028 | 0.008 | 0.252  | 0.007 | 0.101  | 0.134  | 0.035  | 0.448  | 0.099  | 0.989   | 0.340  | 1.500   | 0.330  | 0.676  | 160.963 | 0.020 | 1.371  | 3.403  | 0.574 | 0.386 | 0.855 | 1.827   | 2.440   |
| 028-80  | 0.375 | 0.447 | 29.717  | 1.109 | 0.263 | 0.007 | 1.654  | 0.011 | 0.130  | 0.167  | 0.054  | 0.710  | 0.213  | 2.576   | 1.037  | 4.711   | 1.039  | 1.910  | 155.077 | 0.087 | 1.361  | 1.581  | 0.111 | 0.123 | 0.388 | 5.986   | 12.597  |
| 028-81  | 0.389 | 0.482 | 1.076   | 1.129 | 0.061 | 0.010 | 0.115  | 0.013 | 0.117  | 0.064  | 0.024  | 0.155  | 0.037  | 0.270   | 0.084  | 0.403   | 0.133  | 0.460  | 133.718 | 0.066 | 1.332  | 5.653  | 0.749 | 0.217 | 1.377 | 1.676   | 7.345   |
| 028-82  | 0.361 | 0.343 | 22.112  | 1.104 | 0.136 | 0.012 | 0.231  | 0.007 | 0.079  | 0.150  | 0.030  | 0.462  | 0.147  | 1.805   | 0.764  | 3.787   | 0.914  | 1.735  | 125.003 | 0.048 | 1.202  | 7.079  | 1.196 | 0.394 | 1.739 | 2.576   | 6.424   |
| 028-83  | 0.336 | 0.377 | 2.350   | 1.059 | 0.022 | 0.006 | 0.104  | 0.004 | 0.030  | 0.045  | 0.020  | 0.113  | 0.024  | 0.221   | 0.089  | 0.468   | 0.123  | 0.329  | 161.211 | 0.017 | 1.536  | 2.286  | 0.537 | 0.156 | 0.570 | 0.772   | 2.293   |
| 028-84  | 0.339 | 0.491 | 10.545  | 1.061 | 0.113 | 0.013 | 0.231  | 0.012 | 0.105  | 0.154  | 0.024  | 0.360  | 0.103  | 1.023   | 0.391  | 1.786   | 0.405  | 0.710  | 137.142 | 0.044 | 1.256  | 3.433  | 0.608 | 0.269 | 0.850 | 1.484   | 2.832   |
| 028-85  | 0.349 | 0.429 | 11.746  | 1.079 | 0.056 | 0.005 | 0.496  | 0.010 | 0.092  | 0.147  | 0.035  | 0.407  | 0.106  | 1.073   | 0.414  | 1.847   | 0.437  | 0.841  | 162.979 | 0.039 | 1.278  | 1.556  | 0.139 | 0.171 | 0.387 | 4.288   | 6.443   |
| SRM 610 | 1.352 | 9.541 | 9.974   | 0.002 | 8.514 | 9.868 | 9.592  | 9.189 | 9.637  | 9.666  | 9.743  | 9.631  | 9.697  | 9.215   | 9.669  | 9.280   | 8.933  | 9.180  | 9.279   | 9.375 | 11.156 | 8.477  | 8.569 | 8.586 | 5.294 | 9.706   | 9.495   |
| GJ-1std | 0.394 | 0.390 | 3.831   | 1.103 | 0.055 | 0.007 | 0.232  | 0.006 | 0.052  | 0.085  | 0.049  | 0.218  | 0.053  | 0.390   | 0.132  | 0.526   | 0.120  | 0.239  | 107.137 | 0.022 | 1.104  | 1.665  | 0.187 | 0.023 | 0.404 | 0.115   | 5.861   |
| GJ-1std | 0.393 | 0.310 | 3.916   | 1.115 | 0.052 | 0.005 | 0.244  | 0.007 | 0.053  | 0.102  | 0.047  | 0.213  | 0.056  | 0.440   | 0.143  | 0.586   | 0.116  | 0.242  | 107.314 | 0.020 | 1.134  | 1.897  | 0.183 | 0.024 | 0.459 | 0.124   | 5.971   |
| Ple     | 0.385 | 1.308 | 6.461   | 1.116 | 0.094 | 0.008 | 0.051  | 0.009 | 0.092  | 0.146  | 0.044  | 0.372  | 0.094  | 0.803   | 0.224  | 0.794   | 0.142  | 0.162  | 181.385 | 0.063 | 1.514  | 1.432  | 0.142 | 0.053 | 0.348 | 0.832   | 8.908   |
| 91500   | 0.391 | 0.510 | 1.989   | 1.147 | 0.030 | 0.004 | 0.070  | 0.004 | 0.034  | 0.062  | 0.022  | 0.133  | 0.029  | 0.258   | 0.096  | 0.456   | 0.121  | 0.210  | 87.875  | 0.023 | 1.201  | 0.678  | 0.103 | 0.063 | 0.169 | 0.432   | 1.169   |
| 028-86  | 0.355 | 0.466 | 26.915  | 1.165 | 0.047 | 0.007 | 0.258  | 0.023 | 0.271  | 0.371  | 0.044  | 1.063  | 0.301  | 2.959   | 0.981  | 4.171   | 0.793  | 1.196  | 133.069 | 0.029 | 1.250  | 3.465  | 0.532 | 0.488 | 0.881 | 2.653   | 2.605   |
| 028-87  | 0.340 | 0.366 | 8.787   | 1.080 | 0.068 | 0.007 | 0.129  | 0.007 | 0.068  | 0.123  | 0.027  | 0.331  | 0.089  | 0.958   | 0.330  | 1.575   | 0.402  | 0.950  | 106.357 | 0.037 | 1.194  | 7.740  | 1.200 | 0.448 | 1.899 | 1.522   | 3.886   |
| 028-88  | 0.338 | 0.370 | 10.585  | 1.071 | 0.025 | 0.005 | 0.173  | 0.007 | 0.078  | 0.109  | 0.035  | 0.306  | 0.087  | 0.839   | 0.368  | 1.685   | 0.391  | 0.807  | 129.792 | 0.017 | 1.251  | 1.227  | 0.234 | 0.085 | 0.304 | 0.346   | 0.934   |
| 028-89  | 0.388 | 0.531 | 17.326  | 1.154 | 0.105 | 3.485 | 5.471  | 0.697 | 3.123  | 0.779  | 0.089  | 1.511  | 0.350  | 3.556   | 1.156  | 4.512   | 0.815  | 1.247  | 113.480 | 0.047 | 1.921  | 4.998  | 0.885 | 0.695 | 1.274 | 6.571   | 3.899   |

|         |       |        |        |       |       |        |        |       |       |        |        |        |        |       |        |       |       |       |         |        |        |       |       |       |       |        |        |
|---------|-------|--------|--------|-------|-------|--------|--------|-------|-------|--------|--------|--------|--------|-------|--------|-------|-------|-------|---------|--------|--------|-------|-------|-------|-------|--------|--------|
| 028-90  | 0.407 | 0.612  | 37.761 | 1.152 | 0.475 | 0.091  | 1.154  | 0.028 | 0.167 | 0.168  | 0.038  | 0.676  | 0.264  | 3.461 | 1.363  | 5.970 | 1.239 | 1.978 | 251.165 | 0.168  | 1.351  | 2.156 | 0.144 | 0.160 | 0.528 | 8.198  | 16.827 |
| 91500   | 0.551 | 0.406  | 2.564  | 1.485 | 0.032 | 0.017  | 0.069  | 0.009 | 0.041 | 0.051  | 0.027  | 0.121  | 0.029  | 0.296 | 0.105  | 0.559 | 0.128 | 0.275 | 113.176 | 0.022  | 1.279  | 1.039 | 0.123 | 0.070 | 0.255 | 0.561  | 1.587  |
| Ple     | 0.385 | 1.236  | 6.413  | 1.096 | 0.099 | 0.008  | 0.054  | 0.010 | 0.100 | 0.173  | 0.046  | 0.345  | 0.099  | 0.875 | 0.221  | 0.769 | 0.171 | 0.157 | 174.121 | 0.060  | 1.351  | 1.532 | 0.150 | 0.052 | 0.372 | 0.839  | 8.776  |
| GJ-Istd | 0.416 | 0.414  | 4.108  | 1.158 | 0.057 | 0.005  | 0.253  | 0.005 | 0.052 | 0.092  | 0.045  | 0.212  | 0.060  | 0.424 | 0.135  | 0.546 | 0.132 | 0.248 | 114.323 | 0.021  | 1.421  | 1.792 | 0.189 | 0.022 | 0.434 | 0.124  | 6.257  |
| GJ-Istd | 0.391 | 0.423  | 3.944  | 1.133 | 0.052 | 0.006  | 0.263  | 0.006 | 0.050 | 0.075  | 0.040  | 0.252  | 0.048  | 0.392 | 0.137  | 0.555 | 0.132 | 0.243 | 107.614 | 0.019  | 1.251  | 1.826 | 0.183 | 0.022 | 0.442 | 0.116  | 6.145  |
| SRM 610 | 1.365 | 10.359 | 9.943  | 0.002 | 9.194 | 10.052 | 10.068 | 9.455 | 9.475 | 10.142 | 10.441 | 10.027 | 10.063 | 9.848 | 10.488 | 9.682 | 9.462 | 9.568 | 9.744   | 10.205 | 10.012 | 8.961 | 8.865 | 8.687 | 5.408 | 10.099 | 10.152 |
| SRM 610 | 1.481 | 9.828  | 9.590  | 0.002 | 8.906 | 10.138 | 9.881  | 9.434 | 9.426 | 10.271 | 10.149 | 9.816  | 9.700  | 9.300 | 9.945  | 9.597 | 9.151 | 9.493 | 9.660   | 9.668  | 10.627 | 8.423 | 8.433 | 8.181 | 5.099 | 9.677  | 9.663  |
| GJ-Istd | 0.406 | 0.373  | 3.995  | 1.127 | 0.048 | 0.012  | 0.239  | 0.012 | 0.053 | 0.102  | 0.047  | 0.216  | 0.051  | 0.425 | 0.151  | 0.549 | 0.131 | 0.235 | 105.807 | 0.022  | 1.318  | 1.884 | 0.255 | 0.074 | 0.460 | 0.112  | 6.049  |
| GJ-Istd | 0.405 | 0.368  | 4.226  | 1.162 | 0.054 | 0.026  | 0.230  | 0.064 | 0.054 | 0.095  | 0.052  | 0.259  | 0.079  | 0.409 | 0.127  | 0.537 | 0.122 | 0.271 | 112.878 | 0.029  | 1.404  | 1.867 | 0.230 | 0.028 | 0.453 | 0.122  | 6.443  |
| Ple     | 0.384 | 1.358  | 5.757  | 1.176 | 0.082 | 0.009  | 0.054  | 0.014 | 0.078 | 0.147  | 0.041  | 0.256  | 0.080  | 0.708 | 0.203  | 0.724 | 0.132 | 0.134 | 195.448 | 0.060  | 1.580  | 1.404 | 0.145 | 0.044 | 0.341 | 0.739  | 8.201  |
| 91500   | 0.391 | 0.388  | 1.823  | 1.079 | 0.032 | 0.016  | 0.059  | 0.034 | 0.033 | 0.052  | 0.027  | 0.329  | 0.028  | 0.225 | 0.092  | 0.416 | 0.130 | 0.190 | 81.544  | 0.024  | 1.407  | 0.668 | 0.114 | 0.059 | 0.167 | 0.380  | 1.042  |
| 028-91  | 0.361 | 0.446  | 11.031 | 1.099 | 0.063 | 0.007  | 0.351  | 0.009 | 0.086 | 0.132  | 0.024  | 0.401  | 0.109  | 1.134 | 0.401  | 1.843 | 0.413 | 0.647 | 156.158 | 0.036  | 1.290  | 3.069 | 0.499 | 0.317 | 0.766 | 1.984  | 2.537  |
| 028-92  | 0.423 | 0.389  | 2.927  | 1.209 | 0.068 | 4.620  | 10.215 | 1.299 | 5.565 | 0.979  | 0.075  | 1.517  | 0.086  | 0.553 | 0.177  | 0.781 | 0.225 | 0.410 | 175.831 | 0.041  | 1.310  | 1.489 | 0.365 | 0.207 | 0.384 | 0.660  | 1.749  |
| 028-93  | 0.312 | 0.451  | 10.503 | 1.377 | 0.124 | 0.013  | 0.254  | 0.014 | 0.081 | 0.126  | 0.021  | 0.289  | 0.099  | 0.915 | 0.374  | 1.731 | 0.419 | 0.762 | 233.503 | 0.067  | 1.205  | 3.998 | 0.485 | 0.235 | 0.977 | 1.609  | 3.738  |
| 028-94  | 0.381 | 0.478  | 25.799 | 1.167 | 0.371 | 0.007  | 0.851  | 0.013 | 0.128 | 0.214  | 0.055  | 0.622  | 0.188  | 2.170 | 0.924  | 4.403 | 1.015 | 1.836 | 167.798 | 0.118  | 1.325  | 0.615 | 0.113 | 0.189 | 0.181 | 4.658  | 6.378  |
| 028-95  | 0.370 | 0.452  | 6.404  | 1.142 | 0.030 | 0.015  | 0.206  | 0.005 | 0.063 | 0.095  | 0.030  | 0.250  | 0.058  | 0.624 | 0.230  | 1.074 | 0.266 | 0.557 | 143.692 | 0.022  | 1.427  | 0.652 | 0.076 | 0.086 | 0.166 | 1.606  | 2.894  |
| 028-96  | 0.305 | 0.528  | 27.319 | 1.012 | 0.048 | 0.007  | 0.273  | 0.017 | 0.211 | 0.318  | 0.033  | 1.064  | 0.297  | 2.818 | 1.024  | 4.135 | 0.772 | 1.198 | 144.721 | 0.020  | 1.291  | 1.264 | 0.172 | 0.202 | 0.325 | 1.350  | 1.107  |
| 028-97  | 0.386 | 0.443  | 20.218 | 1.166 | 0.193 | 0.009  | 0.382  | 0.015 | 0.164 | 0.215  | 0.032  | 0.663  | 0.184  | 1.849 | 0.750  | 3.142 | 0.695 | 1.101 | 156.446 | 0.071  | 1.333  | 3.589 | 0.498 | 0.424 | 0.900 | 2.971  | 2.859  |
| 028-98  | 0.361 | 0.423  | 9.075  | 1.099 | 0.062 | 0.037  | 0.155  | 0.022 | 0.135 | 0.144  | 0.028  | 0.386  | 0.098  | 0.926 | 0.378  | 1.960 | 0.467 | 0.975 | 166.253 | 0.055  | 1.270  | 1.918 | 0.282 | 0.140 | 0.473 | 0.370  | 2.507  |
| 028-99  | 0.333 | 0.539  | 3.027  | 1.049 | 0.044 | 0.007  | 0.126  | 0.008 | 0.078 | 0.109  | 0.018  | 0.273  | 0.065  | 0.449 | 0.151  | 0.631 | 0.157 | 0.267 | 167.111 | 0.025  | 1.368  | 0.433 | 0.096 | 0.067 | 0.114 | 0.196  | 0.454  |
| 028-100 | 0.332 | 0.418  | 23.284 | 1.110 | 0.105 | 0.007  | 2.032  | 0.015 | 0.153 | 0.252  | 0.080  | 0.605  | 0.169  | 1.986 | 0.750  | 3.391 | 0.707 | 1.509 | 117.314 | 0.031  | 1.232  | 2.021 | 0.163 | 0.322 | 0.517 | 8.082  | 8.116  |
| SRM 610 | 1.328 | 10.258 | 9.895  | 0.002 | 8.999 | 9.931  | 9.720  | 9.109 | 9.581 | 9.740  | 9.991  | 9.537  | 9.310  | 9.236 | 9.563  | 9.278 | 9.027 | 9.339 | 9.239   | 9.619  | 10.246 | 8.722 | 8.692 | 8.589 | 5.328 | 9.402  | 9.785  |
| GJ-Istd | 0.402 | 0.337  | 4.133  | 1.144 | 0.051 | 0.007  | 0.275  | 0.005 | 0.049 | 0.103  | 0.046  | 0.222  | 0.054  | 0.394 | 0.130  | 0.567 | 0.134 | 0.242 | 103.824 | 0.018  | 1.313  | 1.815 | 0.174 | 0.051 | 0.440 | 0.124  | 6.087  |
| GJ-Istd | 0.378 | 0.337  | 3.979  | 1.103 | 0.053 | 0.006  | 0.256  | 0.005 | 0.052 | 0.086  | 0.046  | 0.211  | 0.041  | 0.429 | 0.136  | 0.584 | 0.123 | 0.226 | 105.742 | 0.022  | 1.313  | 1.762 | 0.201 | 0.022 | 0.427 | 0.109  | 5.949  |
| Ple     | 0.345 | 1.296  | 5.345  | 1.040 | 0.083 | 0.006  | 0.050  | 0.011 | 0.080 | 0.130  | 0.035  | 0.262  | 0.080  | 0.676 | 0.197  | 0.614 | 0.124 | 0.135 | 165.579 | 0.054  | 1.449  | 1.277 | 0.128 | 0.041 | 0.311 | 0.678  | 7.667  |
| 91500   | 0.381 | 0.402  | 1.796  | 1.095 | 0.031 | 0.005  | 0.061  | 0.004 | 0.035 | 0.053  | 0.019  | 0.125  | 0.030  | 0.223 | 0.089  | 0.381 | 0.107 | 0.192 | 81.032  | 0.025  | 1.285  | 0.629 | 0.113 | 0.069 | 0.159 | 0.405  | 1.122  |
| 028-101 | 0.384 | 0.380  | 23.846 | 1.109 | 0.087 | 1.847  | 3.245  | 0.445 | 1.800 | 0.352  | 0.073  | 0.618  | 0.208  | 2.082 | 0.782  | 3.603 | 0.827 | 1.458 | 145.145 | 0.043  | 1.275  | 1.130 | 0.101 | 0.158 | 0.286 | 7.540  | 9.918  |
| 028-102 | 0.355 | 0.444  | 10.798 | 1.056 | 0.055 | 0.005  | 0.114  | 0.006 | 0.059 | 0.098  | 0.016  | 0.309  | 0.093  | 0.997 | 0.389  | 1.788 | 0.386 | 0.706 | 162.103 | 0.039  | 1.259  | 3.458 | 0.531 | 0.226 | 0.850 | 1.527  | 4.102  |
| 028-103 | 0.386 | 0.442  | 1.230  | 1.075 | 0.022 | 0.005  | 0.095  | 0.005 | 0.044 | 0.070  | 0.025  | 0.179  | 0.040  | 0.274 | 0.089  | 0.374 | 0.086 | 0.183 | 159.524 | 0.015  | 1.218  | 1.180 | 0.258 | 0.119 | 0.297 | 0.194  | 1.122  |
| 028-104 | 0.323 | 0.622  | 16.059 | 0.972 | 0.033 | 0.005  | 0.115  | 0.011 | 0.108 | 0.154  | 0.031  | 0.574  | 0.149  | 1.766 | 0.560  | 2.285 | 0.450 | 0.772 | 108.490 | 0.019  | 1.149  | 0.386 | 0.087 | 0.080 | 0.105 | 0.394  | 0.357  |
| 028-105 | 0.353 | 0.534  | 10.809 | 1.020 | 0.043 | 0.006  | 0.141  | 0.012 | 0.108 | 0.143  | 0.028  | 0.408  | 0.108  | 1.103 | 0.377  | 1.554 | 0.341 | 0.572 | 130.763 | 0.024  | 1.157  | 0.691 | 0.107 | 0.093 | 0.176 | 0.461  | 0.597  |
| 028-106 | 0.387 | 9.748  | 14.290 | 1.328 | 0.070 | 0.005  | 0.223  | 0.006 | 0.096 | 0.137  | 0.027  | 0.453  | 0.119  | 1.309 | 0.491  | 2.323 | 0.493 | 1.019 | 136.013 | 0.019  | 1.131  | 3.312 | 0.547 | 0.295 | 0.822 | 1.429  | 2.252  |
| 028-107 | 0.375 | 0.370  | 39.831 | 1.067 | 0.036 | 0.006  | 0.283  | 0.013 | 0.166 | 0.287  | 0.025  | 1.192  | 0.396  | 4.071 | 1.386  | 5.713 | 1.064 | 1.611 | 148.629 | 0.029  | 1.172  | 7.583 | 0.634 | 1.302 | 1.956 | 14.430 | 13.171 |
| 028-108 | 0.300 | 0.437  | 27.265 | 1.043 | 0.297 | 0.379  | 0.893  | 0.105 | 0.495 | 0.239  | 0.078  | 0.639  | 0.198  | 2.362 | 1.000  | 4.530 | 0.972 | 1.852 | 145.761 | 0.103  | 1.374  | 1.555 | 0.159 | 0.117 | 0.382 | 5.301  | 14.035 |
| 028-109 | 0.336 | 0.447  | 7.553  | 1.098 | 0.054 | 0.008  | 0.126  | 0.006 | 0.065 | 0.114  | 0.026  | 0.312  | 0.069  | 0.756 | 0.291  | 1.391 | 0.325 | 0.690 | 138.837 | 0.035  | 1.373  | 3.869 | 0.638 | 0.229 | 0.951 | 1.176  | 3.691  |
| 028-110 | 0.370 | 0.500  | 23.814 | 1.145 | 0.230 | 0.011  | 1.529  | 0.012 | 0.149 | 0.218  | 0.052  | 0.707  | 0.214  | 2.241 | 0.813  | 3.815 | 0.794 | 1.511 | 143.987 | 0.074  | 1.222  | 0.789 | 0.093 | 0.095 | 0.198 | 4.479  | 7.649  |
| SRM 610 | 1.219 | 9.646  | 9.434  | 0.002 | 8.511 | 9.652  | 9.187  | 9.031 | 9.275 | 9.517  | 9.598  | 9.630  | 8.605  | 8.689 | 8.987  | 8.691 | 8.603 | 9.177 | 8.979   | 8.813  | 10.641 | 8.481 | 8.497 | 8.503 | 5.252 | 8.710  | 9.174  |
| GJ-Istd | 0.393 | 0.351  | 4.120  | 1.127 | 0.049 | 0.005  | 0.256  | 0.005 | 0.054 | 0.092  | 0.043  | 0.262  | 0.047  | 0.399 | 0.133  | 0.568 | 0.130 | 0.232 | 111.084 | 0.021  | 1.298  | 1.744 | 0.182 | 0.022 | 0.423 | 0.121  | 6.204  |
| SRM 610 | 1.321 | 9.669  | 9.966  | 0.002 | 8.749 | 9.936  | 9.852  | 9.265 | 9.918 | 9.813  | 9.997  | 10.043 | 9.555  | 9.366 | 9.632  | 9.279 | 9.048 | 9.612 | 9.621   | 9.847  | 11.074 | 8.976 | 9.030 | 8.892 | 5.513 | 9.579  | 9.687  |
| GJ-Istd | 0.346 | 0.363  | 3.955  | 1.063 | 0.042 | 0.006  | 0.247  | 0.005 | 0.049 | 0.093  | 0.048  | 0.240  | 0.060  | 0.437 | 0.140  | 0.553 | 0.123 | 0.221 | 105.840 | 0.019  | 1.150  | 1.655 | 0.169 | 0.023 | 0.401 | 0.108  | 5.978  |
| GJ-Istd | 0.372 | 0.345  | 3.980  | 1.065 | 0.047 | 0.006  | 0.247  | 0.006 | 0.055 | 0.081  | 0.052  | 0.239  | 0.053  | 0.437 | 0.128  | 0.537 | 0.121 | 0.247 | 107.101 | 0.020  | 1.266  | 1.916 | 0.178 | 0.024 | 0.464 | 0.117  | 5.878  |

|         |       |        |         |       |       |        |        |       |        |        |        |        |       |        |        |        |       |       |         |       |        |       |       |       |       |        |        |
|---------|-------|--------|---------|-------|-------|--------|--------|-------|--------|--------|--------|--------|-------|--------|--------|--------|-------|-------|---------|-------|--------|-------|-------|-------|-------|--------|--------|
| Ple     | 0.358 | 1.286  | 5.610   | 1.037 | 0.084 | 0.007  | 0.050  | 0.011 | 0.079  | 0.105  | 0.035  | 0.298  | 0.081 | 0.725  | 0.196  | 0.721  | 0.126 | 0.134 | 188.887 | 0.064 | 1.411  | 1.270 | 0.137 | 0.049 | 0.309 | 0.750  | 8.408  |
| 91500   | 0.331 | 0.388  | 2.061   | 1.087 | 0.030 | 0.005  | 0.061  | 0.004 | 0.043  | 0.054  | 0.026  | 0.115  | 0.030 | 0.245  | 0.092  | 0.414  | 0.108 | 0.212 | 83.443  | 0.021 | 1.418  | 0.671 | 0.115 | 0.060 | 0.168 | 0.446  | 1.206  |
| 028-111 | 0.322 | 0.468  | 18.111  | 1.043 | 0.027 | 0.006  | 0.256  | 0.013 | 0.143  | 0.220  | 0.056  | 0.594  | 0.163 | 1.829  | 0.637  | 2.767  | 0.582 | 1.134 | 160.964 | 0.020 | 1.515  | 1.579 | 0.141 | 0.304 | 0.414 | 6.787  | 5.191  |
| 028-112 | 0.309 | 0.658  | 10.384  | 1.039 | 0.041 | 0.007  | 0.350  | 0.017 | 0.168  | 0.228  | 0.046  | 0.464  | 0.110 | 1.193  | 0.410  | 1.748  | 0.376 | 0.766 | 122.035 | 0.029 | 1.382  | 1.183 | 0.119 | 0.174 | 0.301 | 4.431  | 5.413  |
| 028-113 | 0.343 | 0.522  | 7.267   | 1.074 | 0.031 | 0.007  | 0.326  | 0.007 | 0.067  | 0.112  | 0.037  | 0.330  | 0.074 | 0.761  | 0.241  | 1.160  | 0.277 | 0.521 | 148.974 | 0.025 | 1.388  | 0.773 | 0.113 | 0.110 | 0.197 | 2.620  | 3.572  |
| 028-114 | 0.581 | 1.275  | 165.711 | 1.604 | 0.209 | 3.480  | 9.769  | 1.227 | 7.583  | 6.298  | 2.074  | 12.084 | 3.282 | 25.870 | 6.327  | 20.922 | 3.755 | 5.088 | 233.790 | 0.041 | 1.415  | 4.722 | 0.435 | 0.592 | 1.184 | 42.647 | 48.570 |
| 028-115 | 0.499 | 0.511  | 17.668  | 1.429 | 0.039 | 12.937 | 26.594 | 3.237 | 12.631 | 1.995  | 0.219  | 1.579  | 0.197 | 1.618  | 0.616  | 2.651  | 0.593 | 1.151 | 192.018 | 0.025 | 1.389  | 1.494 | 0.183 | 0.311 | 0.398 | 6.666  | 6.707  |
| 028-116 | 0.345 | 0.496  | 14.241  | 1.115 | 0.139 | 0.006  | 0.132  | 0.008 | 0.087  | 0.145  | 0.020  | 0.615  | 0.147 | 1.587  | 0.518  | 1.977  | 0.349 | 0.515 | 273.761 | 0.075 | 1.340  | 3.741 | 0.469 | 0.093 | 0.909 | 0.360  | 3.332  |
| 028-117 | 0.351 | 0.495  | 57.692  | 1.107 | 0.169 | 0.015  | 2.109  | 0.030 | 0.399  | 0.567  | 0.122  | 2.027  | 0.559 | 5.845  | 1.850  | 7.200  | 1.321 | 1.992 | 117.644 | 0.067 | 1.077  | 1.009 | 0.108 | 0.268 | 0.282 | 11.747 | 8.718  |
| 028-118 | 0.335 | 0.468  | 9.314   | 1.091 | 0.047 | 0.007  | 0.192  | 0.010 | 0.106  | 0.151  | 0.037  | 0.309  | 0.087 | 0.844  | 0.287  | 1.631  | 0.392 | 0.957 | 137.789 | 0.030 | 1.382  | 1.842 | 0.471 | 0.186 | 0.467 | 0.604  | 2.028  |
| 028-119 | 0.310 | 0.644  | 67.830  | 1.041 | 0.130 | 0.019  | 0.371  | 0.036 | 0.392  | 0.469  | 0.041  | 1.942  | 0.597 | 6.611  | 2.495  | 9.821  | 1.848 | 2.695 | 136.535 | 0.066 | 1.475  | 4.449 | 0.578 | 0.857 | 1.170 | 6.862  | 5.209  |
| 028-120 | 0.322 | 0.720  | 16.618  | 1.082 | 0.031 | 0.010  | 0.319  | 0.022 | 0.192  | 0.253  | 0.061  | 0.700  | 0.160 | 1.708  | 0.553  | 2.422  | 0.557 | 0.989 | 121.315 | 0.025 | 1.380  | 0.823 | 0.120 | 0.177 | 0.221 | 4.772  | 4.197  |
| SRM 610 | 1.194 | 9.322  | 9.537   | 0.002 | 8.417 | 9.589  | 9.334  | 9.044 | 9.142  | 9.045  | 9.614  | 9.289  | 9.254 | 8.744  | 9.093  | 8.953  | 8.695 | 9.284 | 9.102   | 9.210 | 10.144 | 9.059 | 8.675 | 8.562 | 5.347 | 8.917  | 9.145  |
| GJ-1std | 0.378 | 0.382  | 4.263   | 1.142 | 0.059 | 0.007  | 0.267  | 0.005 | 0.043  | 0.097  | 0.051  | 0.204  | 0.050 | 0.417  | 0.150  | 0.551  | 0.130 | 0.248 | 111.551 | 0.023 | 1.288  | 1.766 | 0.194 | 0.021 | 0.428 | 0.120  | 6.409  |
| GJ-1std | 0.394 | 0.347  | 4.273   | 1.105 | 0.048 | 0.006  | 0.261  | 0.005 | 0.053  | 0.091  | 0.048  | 0.235  | 0.052 | 0.400  | 0.138  | 0.617  | 0.126 | 0.233 | 109.863 | 0.020 | 1.329  | 1.763 | 0.170 | 0.052 | 0.428 | 0.119  | 6.174  |
| Ple     | 0.424 | 1.445  | 6.021   | 1.141 | 0.090 | 0.009  | 0.056  | 0.010 | 0.071  | 0.137  | 0.039  | 0.274  | 0.084 | 0.781  | 0.211  | 0.684  | 0.133 | 0.147 | 171.996 | 0.055 | 1.516  | 1.458 | 0.141 | 0.041 | 0.354 | 0.756  | 8.736  |
| 91500   | 0.358 | 0.401  | 2.006   | 1.088 | 0.034 | 0.007  | 0.062  | 0.006 | 0.034  | 0.055  | 0.022  | 0.149  | 0.030 | 0.266  | 0.095  | 0.413  | 0.112 | 0.206 | 81.166  | 0.026 | 1.323  | 0.663 | 0.108 | 0.063 | 0.166 | 0.423  | 1.192  |
| 028-121 | 0.307 | 0.498  | 21.189  | 1.057 | 0.119 | 0.039  | 0.295  | 0.027 | 0.171  | 0.167  | 0.046  | 0.628  | 0.188 | 2.083  | 0.817  | 3.457  | 0.744 | 1.285 | 132.205 | 0.046 | 1.751  | 5.093 | 0.885 | 0.610 | 1.284 | 6.324  | 6.333  |
| 028-122 | 0.338 | 0.432  | 29.921  | 1.093 | 0.132 | 0.007  | 0.266  | 0.011 | 0.135  | 0.264  | 0.029  | 1.075  | 0.328 | 3.318  | 1.151  | 4.326  | 0.784 | 1.232 | 81.400  | 0.065 | 1.417  | 5.916 | 1.020 | 0.439 | 1.462 | 1.874  | 3.629  |
| 028-123 | 0.341 | 0.408  | 2.117   | 1.060 | 0.036 | 0.008  | 0.108  | 0.007 | 0.057  | 0.078  | 0.027  | 0.211  | 0.051 | 0.344  | 0.126  | 0.512  | 0.145 | 0.304 | 188.839 | 0.026 | 1.086  | 3.171 | 0.627 | 0.139 | 0.780 | 0.274  | 2.368  |
| 028-124 | 0.309 | 0.434  | 8.731   | 1.011 | 0.056 | 0.007  | 0.355  | 0.007 | 0.076  | 0.110  | 0.023  | 0.350  | 0.084 | 0.863  | 0.356  | 1.571  | 0.329 | 0.530 | 166.081 | 0.035 | 1.113  | 3.943 | 0.624 | 0.389 | 0.982 | 2.087  | 3.099  |
| 028-125 | 0.317 | 0.383  | 20.252  | 1.046 | 0.041 | 0.009  | 0.428  | 0.020 | 0.232  | 0.282  | 0.092  | 0.837  | 0.221 | 2.016  | 0.758  | 3.207  | 0.680 | 1.275 | 153.732 | 0.024 | 1.362  | 5.029 | 0.866 | 0.545 | 1.260 | 3.079  | 4.206  |
| 028-126 | 0.345 | 0.404  | 19.077  | 1.101 | 0.075 | 0.011  | 0.613  | 0.010 | 0.115  | 0.161  | 0.042  | 0.473  | 0.151 | 1.624  | 0.610  | 2.837  | 0.679 | 1.438 | 193.481 | 0.046 | 1.428  | 2.463 | 0.196 | 0.200 | 0.605 | 6.205  | 10.529 |
| 028-127 | 0.339 | 0.524  | 7.507   | 1.084 | 0.043 | 0.007  | 0.338  | 0.008 | 0.076  | 0.135  | 0.037  | 0.318  | 0.082 | 0.761  | 0.267  | 1.218  | 0.296 | 0.602 | 164.427 | 0.029 | 1.118  | 0.524 | 0.108 | 0.094 | 0.139 | 1.519  | 2.247  |
| 028-128 | 0.344 | 0.620  | 20.393  | 1.097 | 0.126 | 0.008  | 0.500  | 0.029 | 0.302  | 0.365  | 0.128  | 1.133  | 0.256 | 2.427  | 0.802  | 3.062  | 0.603 | 0.957 | 77.626  | 0.052 | 1.368  | 1.227 | 0.121 | 0.152 | 0.308 | 4.724  | 6.304  |
| 028-129 | 0.324 | 0.450  | 9.170   | 1.095 | 0.073 | 0.006  | 0.169  | 0.007 | 0.074  | 0.125  | 0.018  | 0.334  | 0.091 | 0.944  | 0.361  | 1.559  | 0.347 | 0.599 | 126.392 | 0.041 | 1.415  | 2.169 | 0.426 | 0.162 | 0.538 | 0.821  | 1.945  |
| 028-130 | 0.304 | 0.412  | 11.728  | 1.036 | 0.115 | 0.007  | 0.400  | 0.012 | 0.110  | 0.185  | 0.025  | 0.400  | 0.126 | 1.192  | 0.414  | 2.143  | 0.483 | 0.945 | 155.010 | 0.054 | 1.273  | 5.552 | 1.003 | 0.394 | 1.372 | 1.575  | 5.639  |
| SRM 610 | 1.399 | 10.065 | 10.201  | 0.002 | 8.900 | 10.411 | 10.074 | 9.693 | 10.059 | 10.671 | 10.272 | 10.283 | 9.844 | 9.646  | 10.110 | 9.718  | 9.356 | 9.831 | 9.765   | 9.912 | 10.585 | 9.302 | 9.020 | 9.340 | 5.742 | 9.967  | 10.128 |
| GJ-1std | 0.405 | 0.364  | 4.307   | 1.138 | 0.045 | 0.007  | 0.267  | 0.006 | 0.052  | 0.095  | 0.048  | 0.278  | 0.050 | 0.398  | 0.149  | 0.597  | 0.138 | 0.247 | 114.871 | 0.021 | 1.179  | 1.837 | 0.163 | 0.022 | 0.445 | 0.119  | 6.445  |
| GJ-1std | 0.399 | 0.394  | 4.063   | 1.071 | 0.052 | 0.007  | 0.237  | 0.006 | 0.057  | 0.100  | 0.048  | 0.233  | 0.057 | 0.481  | 0.151  | 0.550  | 0.132 | 0.220 | 106.058 | 0.021 | 1.337  | 1.961 | 0.202 | 0.024 | 0.475 | 0.109  | 6.091  |
| Ple     | 0.352 | 1.379  | 5.431   | 1.053 | 0.085 | 0.008  | 0.058  | 0.012 | 0.075  | 0.123  | 0.042  | 0.304  | 0.086 | 0.648  | 0.197  | 0.710  | 0.125 | 0.126 | 163.759 | 0.057 | 1.638  | 1.334 | 0.147 | 0.054 | 0.325 | 0.708  | 7.958  |
| 91500   | 0.350 | 0.369  | 1.898   | 1.070 | 0.029 | 0.007  | 0.065  | 0.005 | 0.037  | 0.056  | 0.023  | 0.156  | 0.029 | 0.254  | 0.087  | 0.420  | 0.111 | 0.201 | 80.272  | 0.026 | 1.282  | 0.678 | 0.123 | 0.065 | 0.170 | 0.440  | 1.118  |
| 028-131 | 0.333 | 0.778  | 8.758   | 1.059 | 0.043 | 0.062  | 0.180  | 0.020 | 0.157  | 0.212  | 0.035  | 0.486  | 0.117 | 1.052  | 0.307  | 1.436  | 0.295 | 0.506 | 145.849 | 0.022 | 1.305  | 0.388 | 0.110 | 0.081 | 0.107 | 0.349  | 0.405  |
| 028-132 | 0.325 | 0.692  | 3.325   | 1.090 | 0.064 | 0.064  | 0.193  | 0.026 | 0.113  | 0.138  | 0.025  | 0.309  | 0.066 | 0.558  | 0.180  | 0.736  | 0.186 | 0.374 | 140.556 | 0.031 | 1.403  | 0.570 | 0.124 | 0.086 | 0.148 | 0.372  | 0.545  |
| 028-133 | 0.327 | 0.447  | 6.944   | 1.041 | 0.056 | 0.013  | 0.239  | 0.010 | 0.078  | 0.138  | 0.021  | 0.340  | 0.091 | 0.795  | 0.284  | 1.262  | 0.293 | 0.444 | 151.599 | 0.042 | 1.207  | 1.974 | 0.423 | 0.217 | 0.498 | 0.786  | 1.484  |
| 028-134 | 0.318 | 0.439  | 17.131  | 1.059 | 0.206 | 0.006  | 0.322  | 0.008 | 0.090  | 0.134  | 0.016  | 0.403  | 0.122 | 1.470  | 0.652  | 2.980  | 0.618 | 1.034 | 183.106 | 0.084 | 1.274  | 3.375 | 0.432 | 0.224 | 0.828 | 1.409  | 3.413  |
| 028-135 | 0.351 | 0.489  | 14.507  | 1.112 | 0.274 | 0.007  | 0.428  | 0.012 | 0.182  | 0.227  | 0.066  | 0.663  | 0.151 | 1.358  | 0.547  | 2.330  | 0.520 | 0.888 | 244.987 | 0.115 | 1.429  | 1.042 | 0.072 | 0.081 | 0.256 | 2.563  | 8.533  |
| 028-136 | 0.356 | 0.392  | 6.375   | 1.110 | 0.062 | 0.022  | 0.880  | 0.022 | 0.156  | 0.141  | 0.052  | 0.329  | 0.078 | 0.572  | 0.227  | 1.025  | 0.248 | 0.517 | 147.529 | 0.032 | 1.372  | 1.265 | 0.150 | 0.205 | 0.326 | 6.715  | 6.046  |
| 028-137 | 0.342 | 0.460  | 6.801   | 1.075 | 0.048 | 0.010  | 0.211  | 0.009 | 0.080  | 0.105  | 0.023  | 0.286  | 0.065 | 0.575  | 0.240  | 1.171  | 0.298 | 0.619 | 161.928 | 0.029 | 1.336  | 7.953 | 1.000 | 0.412 | 1.942 | 2.936  | 8.151  |
| 028-138 | 0.360 | 0.357  | 37.186  | 1.142 | 0.078 | 0.005  | 0.602  | 0.006 | 0.081  | 0.175  | 0.054  | 0.937  | 0.274 | 3.304  | 1.230  | 5.486  | 1.198 | 2.415 | 178.745 | 0.030 | 1.389  | 8.011 | 1.270 | 0.428 | 1.964 | 2.167  | 5.553  |
| 028-139 | 0.334 | 0.601  | 8.430   | 1.078 | 0.065 | 0.009  | 0.212  | 0.009 | 0.090  | 0.118  | 0.021  | 0.332  | 0.086 | 0.819  | 0.318  | 1.362  | 0.278 | 0.480 | 152.596 | 0.040 | 2.082  | 1.240 | 0.208 | 0.176 | 0.317 | 0.916  | 1.186  |

|         |        |        |        |        |        |         |         |         |         |         |         |         |         |         |         |         |         |         |         |         |         |         |         |         |       |         |         |
|---------|--------|--------|--------|--------|--------|---------|---------|---------|---------|---------|---------|---------|---------|---------|---------|---------|---------|---------|---------|---------|---------|---------|---------|---------|-------|---------|---------|
| 028-140 | 0.348  | 0.368  | 10.209 | 1.101  | 0.088  | 0.008   | 0.389   | 0.012   | 0.109   | 0.157   | 0.026   | 0.406   | 0.107   | 0.996   | 0.373   | 1.737   | 0.365   | 0.713   | 151.780 | 0.051   | 1.128   | 5.202   | 0.925   | 0.443   | 1.291 | 2.781   | 4.531   |
| SRM 610 | 1.255  | 9.453  | 9.804  | 0.002  | 8.793  | 9.889   | 9.781   | 9.290   | 9.455   | 10.211  | 9.906   | 9.623   | 9.262   | 8.716   | 9.187   | 8.927   | 8.643   | 9.336   | 9.333   | 9.509   | 11.327  | 9.088   | 9.095   | 9.019   | 5.586 | 9.004   | 9.510   |
| GJ-1std | 0.395  | 0.409  | 4.005  | 1.111  | 0.055  | 0.005   | 0.262   | 0.006   | 0.060   | 0.096   | 0.045   | 0.276   | 0.055   | 0.443   | 0.139   | 0.574   | 0.133   | 0.244   | 113.099 | 0.023   | 1.264   | 1.923   | 0.201   | 0.025   | 0.466 | 0.122   | 6.335   |
| GJ-1std | 0.373  | 0.381  | 3.922  | 1.072  | 0.048  | 0.006   | 0.247   | 0.006   | 0.058   | 0.089   | 0.044   | 0.259   | 0.045   | 0.428   | 0.152   | 0.516   | 0.134   | 0.249   | 105.922 | 0.021   | 1.423   | 1.854   | 0.188   | 0.022   | 0.449 | 0.111   | 5.950   |
| Ple     | 0.382  | 1.387  | 5.656  | 1.092  | 0.088  | 0.007   | 0.053   | 0.011   | 0.085   | 0.138   | 0.039   | 0.315   | 0.079   | 0.708   | 0.222   | 0.672   | 0.150   | 0.149   | 176.353 | 0.057   | 1.405   | 1.439   | 0.135   | 0.039   | 0.349 | 0.750   | 8.633   |
| 91500   | 0.390  | 0.419  | 1.895  | 1.135  | 0.030  | 0.008   | 0.062   | 0.004   | 0.041   | 0.058   | 0.026   | 0.141   | 0.029   | 0.234   | 0.094   | 0.423   | 0.101   | 0.198   | 85.083  | 0.024   | 1.436   | 0.694   | 0.106   | 0.059   | 0.173 | 0.409   | 1.163   |
| 028-141 | 0.316  | 0.464  | 31.245 | 1.069  | 0.227  | 0.007   | 0.873   | 0.013   | 0.132   | 0.204   | 0.045   | 0.735   | 0.244   | 3.015   | 1.139   | 5.209   | 1.113   | 1.868   | 152.846 | 0.095   | 1.445   | 1.218   | 0.122   | 0.130   | 0.303 | 6.444   | 11.329  |
| 028-142 | 0.360  | 0.375  | 4.848  | 1.114  | 0.045  | 0.007   | 0.179   | 0.007   | 0.067   | 0.121   | 0.033   | 0.295   | 0.072   | 0.619   | 0.240   | 1.123   | 0.292   | 0.850   | 191.553 | 0.031   | 1.514   | 0.476   | 0.088   | 0.088   | 0.127 | 0.769   | 2.390   |
| 028-143 | 0.337  | 0.346  | 9.455  | 1.072  | 0.093  | 0.033   | 0.102   | 0.020   | 0.159   | 0.165   | 0.029   | 0.437   | 0.101   | 1.051   | 0.371   | 1.762   | 0.403   | 0.701   | 205.930 | 0.051   | 1.177   | 1.815   | 0.412   | 0.163   | 0.455 | 1.578   | 5.143   |
| 028-144 | 0.361  | 0.389  | 20.646 | 1.129  | 0.181  | 0.008   | 0.108   | 0.008   | 0.063   | 0.140   | 0.031   | 0.457   | 0.131   | 1.577   | 0.696   | 3.537   | 0.908   | 1.992   | 201.596 | 0.083   | 1.239   | 13.102  | 2.096   | 0.281   | 3.195 | 1.305   | 10.950  |
| 028-145 | 0.335  | 0.495  | 7.834  | 1.068  | 0.036  | 0.746   | 1.508   | 0.184   | 0.681   | 0.198   | 0.037   | 0.300   | 0.080   | 0.709   | 0.264   | 1.355   | 0.300   | 0.714   | 133.966 | 0.027   | 1.318   | 0.584   | 0.089   | 0.085   | 0.150 | 1.791   | 2.786   |
| 028-146 | 0.340  | 0.661  | 43.000 | 1.088  | 0.048  | 0.007   | 0.649   | 0.016   | 0.195   | 0.341   | 0.126   | 1.159   | 0.369   | 3.784   | 1.535   | 6.512   | 1.441   | 2.965   | 143.166 | 0.021   | 1.472   | 6.510   | 1.051   | 0.637   | 1.621 | 3.489   | 4.954   |
| 028-147 | 0.361  | 0.380  | 18.352 | 1.108  | 0.187  | 0.008   | 0.338   | 0.009   | 0.078   | 0.132   | 0.017   | 0.457   | 0.136   | 1.747   | 0.701   | 3.143   | 0.669   | 1.115   | 179.831 | 0.079   | 1.522   | 2.812   | 0.545   | 0.370   | 0.716 | 1.993   | 3.693   |
| 028-148 | 0.333  | 0.619  | 29.242 | 1.108  | 0.034  | 0.007   | 0.482   | 0.016   | 0.178   | 0.350   | 0.082   | 1.124   | 0.302   | 2.941   | 0.994   | 4.044   | 0.825   | 1.399   | 132.273 | 0.022   | 1.267   | 1.012   | 0.103   | 0.246   | 0.277 | 6.765   | 4.592   |
| 028-149 | 0.375  | 0.670  | 17.431 | 1.159  | 0.174  | 0.016   | 0.346   | 0.019   | 0.140   | 0.202   | 0.037   | 0.547   | 0.178   | 1.754   | 0.646   | 2.870   | 0.632   | 0.985   | 190.607 | 0.088   | 1.362   | 2.351   | 0.533   | 0.412   | 0.618 | 1.950   | 3.790   |
| 028-150 | 0.351  | 0.538  | 9.764  | 1.127  | 0.075  | 0.024   | 0.304   | 0.011   | 0.090   | 0.140   | 0.020   | 0.346   | 0.093   | 0.981   | 0.375   | 1.683   | 0.341   | 0.572   | 202.289 | 0.042   | 1.340   | 1.607   | 0.220   | 0.144   | 0.398 | 0.939   | 1.549   |
| 028-151 | 0.346  | 0.472  | 13.443 | 1.120  | 0.100  | 0.008   | 0.289   | 0.008   | 0.077   | 0.144   | 0.015   | 0.394   | 0.106   | 1.381   | 0.515   | 2.110   | 0.457   | 0.792   | 134.611 | 0.044   | 1.224   | 4.040   | 0.811   | 0.345   | 1.006 | 1.864   | 3.465   |
| 028-152 | 0.349  | 1.199  | 13.560 | 1.139  | 0.076  | 0.007   | 0.257   | 0.010   | 0.088   | 0.119   | 0.017   | 0.428   | 0.114   | 1.362   | 0.462   | 2.079   | 0.421   | 0.746   | 173.960 | 0.038   | 1.231   | 1.355   | 0.194   | 0.155   | 0.340 | 1.058   | 1.465   |
| 91500   | 0.399  | 0.387  | 1.978  | 1.115  | 0.031  | 0.007   | 0.063   | 0.005   | 0.033   | 0.046   | 0.021   | 0.134   | 0.029   | 0.253   | 0.094   | 0.414   | 0.114   | 0.221   | 83.915  | 0.026   | 1.352   | 0.717   | 0.088   | 0.066   | 0.178 | 0.442   | 1.215   |
| Ple     | 0.374  | 1.167  | 4.928  | 1.117  | 0.078  | 0.007   | 0.044   | 0.008   | 0.078   | 0.099   | 0.027   | 0.240   | 0.072   | 0.559   | 0.177   | 0.533   | 0.108   | 0.110   | 173.943 | 0.050   | 1.450   | 1.266   | 0.145   | 0.044   | 0.308 | 0.636   | 7.300   |
| GJ-1std | 0.363  | 0.412  | 4.041  | 1.106  | 0.045  | 0.006   | 0.245   | 0.006   | 0.057   | 0.091   | 0.045   | 0.245   | 0.056   | 0.436   | 0.138   | 0.523   | 0.134   | 0.251   | 108.305 | 0.021   | 1.306   | 1.859   | 0.169   | 0.031   | 0.450 | 0.116   | 6.221   |
| GJ-1std | 0.390  | 0.365  | 3.977  | 1.083  | 0.049  | 0.006   | 0.255   | 0.006   | 0.052   | 0.087   | 0.043   | 0.235   | 0.055   | 0.415   | 0.153   | 0.565   | 0.124   | 0.238   | 109.967 | 0.021   | 1.313   | 1.862   | 0.170   | 0.024   | 0.451 | 0.118   | 6.160   |
| SRM 610 | 1.370  | 10.548 | 10.310 | 0.002  | 9.270  | 10.556  | 10.342  | 10.124  | 10.361  | 10.389  | 10.551  | 10.512  | 9.888   | 9.713   | 9.869   | 9.426   | 9.302   | 10.081  | 10.190  | 10.219  | 11.663  | 9.523   | 9.600   | 9.334   | 5.807 | 9.823   | 10.098  |
|         |        |        |        |        |        |         |         |         |         |         |         |         |         |         |         |         |         |         |         |         |         |         |         |         |       |         |         |
|         | SiO2   | Ti     | Y      | ZrO2   | Nb     | La      | Ce      | Pr      | Nd      | Sm      | Eu      | Gd      | Tb      | Dy      | Ho      | Er      | Tm      | Lu      | Hf      | Ta      | Pb      | Pb      | Pb      | Pb      | Pb    | Th      | U       |
|         | 29.000 | 49.000 | 89.000 | 91.000 | 93.000 | 139.000 | 140.000 | 141.000 | 146.000 | 147.000 | 153.000 | 157.000 | 159.000 | 163.000 | 165.000 | 166.000 | 169.000 | 175.000 | 178.000 | 181.000 | 204.000 | 206.000 | 207.000 | 208.000 | Total | 232.000 | 238.000 |
|         | wt%    | ppm    | ppm    | wt%    | ppm    | ppm     | ppm     | ppm     | ppm     | ppm     | ppm     | ppm     | ppm     | ppm     | ppm     | ppm     | ppm     | ppm     | ppm     | ppm     | ppm     | ppm     | ppm     | ppm     | ppm   | ppm     | ppm     |
| SRM 610 | 0.215  | 2.218  | 0.058  | 0.000  | 0.037  | 0.041   | 0.022   | 0.022   | 0.069   | 0.000   | 0.060   | 0.298   | 0.023   | 0.120   | 0.000   | 0.057   | 0.024   | 0.017   | 0.000   | 0.019   | 6.082   | 0.072   | 0.068   | 0.061   | 0.149 | 0.009   | 0.009   |
| GJ-1std | 0.165  | 1.705  | 0.029  | 0.000  | 0.013  | 0.021   | 0.015   | 0.020   | 0.000   | 0.000   | 0.040   | 0.174   | 0.008   | 0.060   | 0.014   | 0.038   | 0.013   | 0.000   | 0.029   | 0.020   | 4.884   | 0.054   | 0.045   | 0.032   | 0.108 | 0.005   | 0.007   |
| GJ-1std | 0.148  | 1.602  | 0.027  | 0.000  | 0.030  | 0.021   | 0.017   | 0.008   | 0.000   | 0.075   | 0.033   | 0.150   | 0.008   | 0.031   | 0.000   | 0.043   | 0.010   | 0.022   | 0.064   | 0.009   | 4.383   | 0.051   | 0.033   | 0.029   | 0.096 | 0.005   | 0.008   |
| Ple     | 0.139  | 1.412  | 0.049  | 0.000  | 0.012  | 0.030   | 0.010   | 0.010   | 0.000   | 0.052   | 0.035   | 0.127   | 0.011   | 0.072   | 0.008   | 0.046   | 0.010   | 0.018   | 0.000   | 0.009   | 4.574   | 0.048   | 0.043   | 0.039   | 0.106 | 0.005   | 0.000   |
| 91500   | 0.173  | 1.735  | 0.032  | 0.000  | 0.013  | 0.028   | 0.018   | 0.011   | 0.000   | 0.080   | 0.054   | 0.242   | 0.012   | 0.033   | 0.008   | 0.024   | 0.013   | 0.009   | 0.043   | 0.014   | 5.712   | 0.054   | 0.052   | 0.041   | 0.126 | 0.004   | 0.012   |
| 028-1   | 0.175  | 1.718  | 0.039  | 0.000  | 0.017  | 0.023   | 0.017   | 0.014   | 0.044   | 0.053   | 0.032   | 0.165   | 0.011   | 0.051   | 0.011   | 0.052   | 0.010   | 0.021   | 0.039   | 0.000   | 4.719   | 0.047   | 0.050   | 0.030   | 0.104 | 0.000   | 0.008   |
| 028-2   | 0.157  | 1.335  | 0.034  | 0.000  | 0.024  | 0.025   | 0.010   | 0.014   | 0.062   | 0.090   | 0.032   | 0.143   | 0.011   | 0.042   | 0.011   | 0.051   | 0.014   | 0.011   | 0.040   | 0.015   | 5.357   | 0.043   | 0.061   | 0.038   | 0.119 | 0.005   | 0.007   |
| 028-3   | 0.168  | 1.977  | 0.055  | 0.000  | 0.000  | 0.022   | 0.010   | 0.011   | 0.047   | 0.094   | 0.027   | 0.162   | 0.017   | 0.054   | 0.011   | 0.039   | 0.018   | 0.016   | 0.066   | 0.013   | 4.525   | 0.043   | 0.046   | 0.029   | 0.099 | 0.005   | 0.007   |
| 028-4   | 0.171  | 1.737  | 0.046  | 0.000  | 0.021  | 0.025   | 0.017   | 0.018   | 0.000   | 0.054   | 0.044   | 0.204   | 0.017   | 0.084   | 0.000   | 0.061   | 0.013   | 0.018   | 0.029   | 0.013   | 4.675   | 0.043   | 0.048   | 0.044   | 0.110 | 0.003   | 0.000   |
| 028-5   | 0.213  | 4.108  | 0.099  | 0.000  | 0.000  | 0.000   | 0.135   | 0.000   | 0.000   | 0.357   | 0.000   | 0.454   | 0.000   | 0.204   | 0.000   | 0.000   | 0.000   | 0.000   | 0.000   | 0.000   | 9.165   | 0.115   | 0.177   | 0.064   | 0.229 | 0.000   | 0.000   |
| 028-6   | 0.155  | 1.703  | 0.033  | 0.000  | 0.022  | 0.022   | 0.015   | 0.020   | 0.090   | 0.055   | 0.045   | 0.202   | 0.017   | 0.068   | 0.008   | 0.032   | 0.011   | 0.012   | 0.000   | 0.000   | 4.769   | 0.044   | 0.048   | 0.031   | 0.104 | 0.006   | 0.000   |
| 028-7   | 0.142  | 1.226  | 0.047  | 0.000  | 0.021  | 0.034   | 0.017   | 0.019   | 0.000   | 0.000   | 0.030   | 0.133   | 0.011   | 0.031   | 0.014   | 0.044   | 0.013   | 0.008   | 0.064   | 0.009   | 5.075   | 0.045   | 0.072   | 0.028   | 0.112 | 0.008   | 0.006   |
| 028-8   | 0.124  | 1.386  | 0.042  | 0.000  | 0.021  | 0.030   | 0.022   | 0.011   | 0.064   | 0.106   | 0.039   | 0.160   | 0.015   | 0.085   | 0.008   | 0.050   | 0.019   | 0.008   | 0.041   | 0.000   | 5.942   | 0.048   | 0.040   | 0.034   | 0.122 | 0.008   | 0.005   |
| 028-9   | 0.193  | 1.849  | 0.058  | 0.000  | 0.022  | 0.020   | 0.023   | 0.014   | 0.067   | 0.080   | 0.035   | 0.159   | 0.012   | 0.075   | 0.000   | 0.023   | 0.019   | 0.015   | 0.000   | 0.010   | 4.881   | 0.042   | 0.037   | 0.037   | 0.106 | 0.004   | 0.008   |

|         |       |       |       |       |       |       |       |       |       |       |       |       |       |       |       |       |       |       |       |       |       |       |       |       |       |       |       |
|---------|-------|-------|-------|-------|-------|-------|-------|-------|-------|-------|-------|-------|-------|-------|-------|-------|-------|-------|-------|-------|-------|-------|-------|-------|-------|-------|-------|
| 028-10  | 0.112 | 1.728 | 0.046 | 0.000 | 0.027 | 0.021 | 0.014 | 0.013 | 0.077 | 0.117 | 0.040 | 0.159 | 0.008 | 0.069 | 0.013 | 0.048 | 0.014 | 0.008 | 0.040 | 0.009 | 5.015 | 0.045 | 0.043 | 0.035 | 0.109 | 0.006 | 0.000 |
| SRM 610 | 0.257 | 2.642 | 0.065 | 0.000 | 0.037 | 0.046 | 0.033 | 0.012 | 0.097 | 0.117 | 0.058 | 0.316 | 0.020 | 0.081 | 0.024 | 0.048 | 0.026 | 0.024 | 0.075 | 0.019 | 7.997 | 0.099 | 0.065 | 0.046 | 0.174 | 0.010 | 0.008 |
| GJ-1std | 0.131 | 1.698 | 0.057 | 0.000 | 0.022 | 0.022 | 0.000 | 0.000 | 0.092 | 0.000 | 0.034 | 0.270 | 0.011 | 0.045 | 0.000 | 0.054 | 0.008 | 0.018 | 0.000 | 0.013 | 5.683 | 0.030 | 0.054 | 0.030 | 0.114 | 0.006 | 0.008 |
| GJ-1std | 0.168 | 2.589 | 0.080 | 0.000 | 0.038 | 0.039 | 0.000 | 0.031 | 0.000 | 0.163 | 0.076 | 0.318 | 0.017 | 0.093 | 0.017 | 0.049 | 0.032 | 0.024 | 0.062 | 0.032 | 6.286 | 0.062 | 0.029 | 0.050 | 0.135 | 0.007 | 0.007 |
| Ple     | 0.126 | 1.859 | 0.043 | 0.000 | 0.021 | 0.035 | 0.014 | 0.013 | 0.045 | 0.054 | 0.026 | 0.196 | 0.011 | 0.066 | 0.000 | 0.048 | 0.010 | 0.014 | 0.048 | 0.017 | 5.795 | 0.043 | 0.049 | 0.031 | 0.119 | 0.004 | 0.005 |
| 91500   | 0.154 | 1.591 | 0.051 | 0.000 | 0.013 | 0.023 | 0.019 | 0.018 | 0.068 | 0.140 | 0.032 | 0.171 | 0.008 | 0.047 | 0.017 | 0.041 | 0.014 | 0.015 | 0.060 | 0.014 | 5.515 | 0.048 | 0.050 | 0.040 | 0.121 | 0.005 | 0.007 |
| 028-11  | 0.136 | 1.701 | 0.051 | 0.000 | 0.013 | 0.031 | 0.021 | 0.015 | 0.109 | 0.109 | 0.031 | 0.264 | 0.014 | 0.045 | 0.014 | 0.033 | 0.011 | 0.008 | 0.000 | 0.013 | 6.052 | 0.041 | 0.050 | 0.040 | 0.127 | 0.009 | 0.006 |
| 028-12  | 0.125 | 1.685 | 0.047 | 0.000 | 0.018 | 0.026 | 0.017 | 0.020 | 0.046 | 0.054 | 0.030 | 0.133 | 0.008 | 0.072 | 0.014 | 0.050 | 0.011 | 0.020 | 0.029 | 0.009 | 4.399 | 0.044 | 0.046 | 0.030 | 0.098 | 0.004 | 0.010 |
| 028-13  | 0.142 | 1.476 | 0.031 | 0.000 | 0.022 | 0.016 | 0.015 | 0.015 | 0.047 | 0.077 | 0.034 | 0.174 | 0.011 | 0.000 | 0.016 | 0.000 | 0.008 | 0.016 | 0.041 | 0.013 | 4.567 | 0.072 | 0.045 | 0.038 | 0.111 | 0.006 | 0.006 |
| 028-14  | 0.140 | 1.604 | 0.030 | 0.000 | 0.013 | 0.028 | 0.015 | 0.013 | 0.127 | 0.055 | 0.045 | 0.217 | 0.016 | 0.068 | 0.012 | 0.023 | 0.016 | 0.008 | 0.000 | 0.013 | 4.902 | 0.054 | 0.048 | 0.032 | 0.109 | 0.005 | 0.010 |
| 028-15  | 0.305 | 3.074 | 0.123 | 0.000 | 0.048 | 0.000 | 0.000 | 0.029 | 0.000 | 0.000 | 0.000 | 0.365 | 0.030 | 0.000 | 0.000 | 0.000 | 0.029 | 0.031 | 0.111 | 0.000 | 8.636 | 0.103 | 0.070 | 0.050 | 0.187 | 0.000 | 0.017 |
| 028-16  | 0.227 | 1.856 | 0.037 | 0.000 | 0.000 | 0.018 | 0.024 | 0.024 | 0.105 | 0.125 | 0.036 | 0.245 | 0.018 | 0.052 | 0.000 | 0.000 | 0.013 | 0.019 | 0.048 | 0.021 | 7.588 | 0.051 | 0.065 | 0.039 | 0.153 | 0.009 | 0.009 |
| 028-17  | 0.149 | 1.922 | 0.061 | 0.000 | 0.000 | 0.036 | 0.018 | 0.011 | 0.048 | 0.079 | 0.031 | 0.227 | 0.008 | 0.046 | 0.012 | 0.024 | 0.019 | 0.009 | 0.030 | 0.018 | 6.724 | 0.032 | 0.065 | 0.024 | 0.129 | 0.005 | 0.006 |
| 028-18  | 0.118 | 1.678 | 0.039 | 0.000 | 0.000 | 0.036 | 0.026 | 0.014 | 0.000 | 0.000 | 0.045 | 0.161 | 0.014 | 0.033 | 0.009 | 0.033 | 0.013 | 0.024 | 0.043 | 0.013 | 5.707 | 0.055 | 0.049 | 0.029 | 0.120 | 0.003 | 0.007 |
| 028-19  | 0.225 | 2.400 | 0.041 | 0.000 | 0.000 | 0.021 | 0.019 | 0.014 | 0.118 | 0.100 | 0.068 | 0.280 | 0.000 | 0.127 | 0.000 | 0.106 | 0.014 | 0.000 | 0.054 | 0.024 | 5.797 | 0.066 | 0.059 | 0.041 | 0.132 | 0.000 | 0.000 |
| 028-20  | 0.172 | 1.818 | 0.056 | 0.000 | 0.049 | 0.036 | 0.020 | 0.015 | 0.000 | 0.104 | 0.050 | 0.237 | 0.021 | 0.083 | 0.000 | 0.081 | 0.020 | 0.000 | 0.000 | 0.018 | 5.886 | 0.040 | 0.049 | 0.046 | 0.127 | 0.006 | 0.007 |
| SRM 610 | 0.193 | 2.457 | 0.055 | 0.000 | 0.028 | 0.041 | 0.023 | 0.000 | 0.124 | 0.146 | 0.048 | 0.223 | 0.018 | 0.096 | 0.013 | 0.073 | 0.017 | 0.000 | 0.046 | 0.015 | 7.596 | 0.064 | 0.070 | 0.044 | 0.160 | 0.013 | 0.013 |
| GJ-1std | 0.179 | 2.023 | 0.048 | 0.000 | 0.018 | 0.034 | 0.025 | 0.019 | 0.112 | 0.078 | 0.061 | 0.283 | 0.026 | 0.046 | 0.020 | 0.033 | 0.026 | 0.012 | 0.059 | 0.000 | 6.279 | 0.067 | 0.058 | 0.030 | 0.133 | 0.009 | 0.007 |
| GJ-1std | 0.130 | 1.963 | 0.049 | 0.000 | 0.023 | 0.031 | 0.019 | 0.019 | 0.000 | 0.058 | 0.055 | 0.165 | 0.000 | 0.088 | 0.021 | 0.035 | 0.018 | 0.023 | 0.032 | 0.014 | 4.868 | 0.043 | 0.066 | 0.027 | 0.107 | 0.008 | 0.006 |
| Ple     | 0.157 | 1.577 | 0.041 | 0.000 | 0.036 | 0.022 | 0.020 | 0.013 | 0.064 | 0.054 | 0.036 | 0.207 | 0.014 | 0.064 | 0.012 | 0.039 | 0.013 | 0.020 | 0.029 | 0.000 | 5.490 | 0.046 | 0.053 | 0.026 | 0.113 | 0.003 | 0.008 |
| 91500   | 0.137 | 1.678 | 0.039 | 0.000 | 0.018 | 0.024 | 0.024 | 0.015 | 0.066 | 0.094 | 0.031 | 0.213 | 0.000 | 0.033 | 0.008 | 0.051 | 0.011 | 0.012 | 0.000 | 0.013 | 5.461 | 0.049 | 0.060 | 0.024 | 0.114 | 0.005 | 0.009 |
| 028-21  | 0.144 | 1.420 | 0.055 | 0.000 | 0.000 | 0.011 | 0.025 | 0.011 | 0.065 | 0.106 | 0.061 | 0.184 | 0.008 | 0.032 | 0.016 | 0.061 | 0.024 | 0.015 | 0.030 | 0.016 | 5.043 | 0.027 | 0.040 | 0.038 | 0.106 | 0.007 | 0.008 |
| 028-22  | 0.129 | 1.518 | 0.036 | 0.002 | 0.025 | 0.033 | 0.025 | 0.013 | 0.000 | 0.055 | 0.057 | 0.230 | 0.000 | 0.055 | 0.008 | 0.064 | 0.018 | 0.018 | 0.030 | 0.016 | 6.011 | 0.051 | 0.058 | 0.032 | 0.126 | 0.009 | 0.006 |
| 028-23  | 0.145 | 1.549 | 0.044 | 0.000 | 0.000 | 0.031 | 0.020 | 0.015 | 0.130 | 0.076 | 0.059 | 0.193 | 0.016 | 0.045 | 0.000 | 0.033 | 0.021 | 0.009 | 0.042 | 0.018 | 5.494 | 0.069 | 0.049 | 0.026 | 0.118 | 0.004 | 0.007 |
| 028-24  | 0.133 | 1.769 | 0.035 | 0.000 | 0.044 | 0.018 | 0.022 | 0.000 | 0.064 | 0.075 | 0.038 | 0.161 | 0.011 | 0.112 | 0.008 | 0.050 | 0.015 | 0.014 | 0.030 | 0.018 | 5.528 | 0.050 | 0.062 | 0.025 | 0.116 | 0.008 | 0.004 |
| 028-25  | 0.116 | 1.739 | 0.050 | 0.000 | 0.022 | 0.021 | 0.014 | 0.013 | 0.064 | 0.000 | 0.037 | 0.155 | 0.011 | 0.079 | 0.012 | 0.024 | 0.008 | 0.018 | 0.050 | 0.013 | 5.312 | 0.058 | 0.070 | 0.033 | 0.121 | 0.009 | 0.013 |
| SRM 610 | 0.207 | 1.940 | 0.070 | 0.000 | 0.000 | 0.047 | 0.026 | 0.028 | 0.096 | 0.082 | 0.055 | 0.216 | 0.012 | 0.133 | 0.018 | 0.069 | 0.000 | 0.018 | 0.045 | 0.015 | 7.350 | 0.048 | 0.069 | 0.049 | 0.155 | 0.008 | 0.008 |
| GJ-1std | 0.120 | 1.568 | 0.044 | 0.000 | 0.035 | 0.034 | 0.017 | 0.015 | 0.046 | 0.055 | 0.053 | 0.262 | 0.014 | 0.056 | 0.012 | 0.056 | 0.021 | 0.012 | 0.030 | 0.014 | 5.694 | 0.067 | 0.057 | 0.032 | 0.125 | 0.008 | 0.008 |
| GJ-1std | 0.107 | 1.357 | 0.041 | 0.000 | 0.027 | 0.020 | 0.014 | 0.013 | 0.075 | 0.118 | 0.051 | 0.163 | 0.019 | 0.044 | 0.017 | 0.023 | 0.015 | 0.021 | 0.050 | 0.016 | 5.480 | 0.056 | 0.052 | 0.036 | 0.120 | 0.007 | 0.008 |
| Ple     | 0.110 | 1.784 | 0.041 | 0.000 | 0.017 | 0.033 | 0.025 | 0.024 | 0.044 | 0.000 | 0.032 | 0.169 | 0.013 | 0.053 | 0.011 | 0.057 | 0.017 | 0.014 | 0.029 | 0.009 | 6.620 | 0.046 | 0.066 | 0.031 | 0.134 | 0.009 | 0.005 |
| 91500   | 0.135 | 2.037 | 0.046 | 0.000 | 0.018 | 0.028 | 0.010 | 0.021 | 0.046 | 0.055 | 0.043 | 0.261 | 0.016 | 0.085 | 0.012 | 0.041 | 0.017 | 0.015 | 0.043 | 0.017 | 4.836 | 0.057 | 0.057 | 0.029 | 0.109 | 0.009 | 0.004 |
| SRM 610 | 0.361 | 1.731 | 0.050 | 0.000 | 0.023 | 0.032 | 0.021 | 0.021 | 0.083 | 0.113 | 0.044 | 0.318 | 0.023 | 0.060 | 0.009 | 0.084 | 0.012 | 0.013 | 0.065 | 0.018 | 6.974 | 0.064 | 0.070 | 0.035 | 0.147 | 0.010 | 0.058 |
| GJ-1std | 0.087 | 1.186 | 0.031 | 0.000 | 0.010 | 0.027 | 0.023 | 0.009 | 0.053 | 0.086 | 0.038 | 0.165 | 0.012 | 0.038 | 0.014 | 0.054 | 0.009 | 0.010 | 0.021 | 0.007 | 3.474 | 0.050 | 0.039 | 0.034 | 0.087 | 0.006 | 0.005 |
| GJ-1std | 0.142 | 1.051 | 0.031 | 0.000 | 0.013 | 0.022 | 0.013 | 0.007 | 0.052 | 0.101 | 0.031 | 0.207 | 0.006 | 0.056 | 0.011 | 0.056 | 0.014 | 0.012 | 0.021 | 0.016 | 3.990 | 0.042 | 0.061 | 0.024 | 0.092 | 0.007 | 0.007 |
| Ple     | 0.114 | 1.163 | 0.033 | 0.000 | 0.012 | 0.028 | 0.019 | 0.011 | 0.043 | 0.079 | 0.033 | 0.176 | 0.015 | 0.067 | 0.010 | 0.031 | 0.014 | 0.008 | 0.021 | 0.013 | 5.162 | 0.051 | 0.039 | 0.024 | 0.106 | 0.008 | 0.005 |
| 91500   | 0.108 | 1.167 | 0.026 | 0.000 | 0.016 | 0.018 | 0.018 | 0.011 | 0.057 | 0.050 | 0.027 | 0.165 | 0.008 | 0.042 | 0.000 | 0.042 | 0.014 | 0.000 | 0.044 | 0.013 | 3.931 | 0.040 | 0.030 | 0.032 | 0.088 | 0.006 | 0.004 |
| 028-26  | 0.126 | 1.229 | 0.037 | 0.000 | 0.018 | 0.029 | 0.019 | 0.013 | 0.032 | 0.065 | 0.045 | 0.143 | 0.010 | 0.050 | 0.012 | 0.048 | 0.014 | 0.014 | 0.038 | 0.012 | 4.245 | 0.068 | 0.048 | 0.026 | 0.100 | 0.007 | 0.005 |
| 028-27  | 0.106 | 1.219 | 0.039 | 0.000 | 0.011 | 0.024 | 0.016 | 0.010 | 0.061 | 0.038 | 0.025 | 0.231 | 0.008 | 0.067 | 0.010 | 0.042 | 0.012 | 0.006 | 0.060 | 0.012 | 4.509 | 0.047 | 0.055 | 0.033 | 0.104 | 0.007 | 0.012 |
| 028-28  | 0.126 | 1.343 | 0.047 | 0.000 | 0.013 | 0.030 | 0.020 | 0.013 | 0.077 | 0.067 | 0.051 | 0.067 | 0.017 | 0.090 | 0.011 | 0.056 | 0.000 | 0.000 | 0.054 | 0.012 | 8.001 | 0.047 | 0.078 | 0.025 | 0.154 | 0.008 | 0.007 |
| 028-29  | 0.106 | 1.169 | 0.024 | 0.000 | 0.010 | 0.020 | 0.016 | 0.010 | 0.059 | 0.080 | 0.040 | 0.194 | 0.008 | 0.049 | 0.017 | 0.055 | 0.011 | 0.010 | 0.064 | 0.012 | 3.986 | 0.037 | 0.050 | 0.028 | 0.090 | 0.004 | 0.005 |
| 028-30  | 0.156 | 1.088 | 0.026 | 0.000 | 0.012 | 0.023 | 0.011 | 0.005 | 0.060 | 0.052 | 0.030 | 0.242 | 0.008 | 0.053 | 0.010 | 0.049 | 0.008 | 0.014 | 0.059 | 0.012 | 4.538 | 0.027 | 0.060 | 0.030 | 0.099 | 0.006 | 0.006 |

|         |       |       |       |       |       |       |       |       |       |       |       |       |       |       |       |       |       |       |       |       |       |       |       |       |       |       |       |
|---------|-------|-------|-------|-------|-------|-------|-------|-------|-------|-------|-------|-------|-------|-------|-------|-------|-------|-------|-------|-------|-------|-------|-------|-------|-------|-------|-------|
| 028-31  | 0.093 | 0.967 | 0.029 | 0.001 | 0.016 | 0.023 | 0.022 | 0.014 | 0.082 | 0.083 | 0.032 | 0.203 | 0.000 | 0.040 | 0.010 | 0.033 | 0.008 | 0.014 | 0.048 | 0.014 | 3.823 | 0.041 | 0.039 | 0.054 | 0.100 | 0.005 | 0.004 |
| 028-32  | 0.119 | 1.103 | 0.037 | 0.000 | 0.015 | 0.017 | 0.012 | 0.017 | 0.045 | 0.039 | 0.043 | 0.178 | 0.019 | 0.046 | 0.013 | 0.037 | 0.011 | 0.012 | 0.031 | 0.010 | 4.005 | 0.058 | 0.047 | 0.029 | 0.095 | 0.010 | 0.004 |
| 028-33  | 0.136 | 1.009 | 0.038 | 0.000 | 0.011 | 0.022 | 0.014 | 0.012 | 0.088 | 0.039 | 0.041 | 0.226 | 0.016 | 0.063 | 0.006 | 0.043 | 0.012 | 0.012 | 0.038 | 0.010 | 4.149 | 0.056 | 0.071 | 0.024 | 0.100 | 0.009 | 0.007 |
| 028-34  | 0.106 | 1.235 | 0.026 | 0.000 | 0.022 | 0.024 | 0.017 | 0.014 | 0.062 | 0.039 | 0.038 | 0.190 | 0.008 | 0.091 | 0.015 | 0.040 | 0.008 | 0.012 | 0.038 | 0.015 | 4.526 | 0.040 | 0.040 | 0.029 | 0.097 | 0.006 | 0.004 |
| 028-35  | 0.102 | 1.195 | 0.027 | 0.000 | 0.010 | 0.019 | 0.011 | 0.010 | 0.074 | 0.053 | 0.039 | 0.164 | 0.013 | 0.072 | 0.010 | 0.043 | 0.011 | 0.000 | 0.030 | 0.013 | 4.174 | 0.042 | 0.054 | 0.030 | 0.096 | 0.005 | 0.008 |
| SRM 610 | 0.170 | 1.745 | 0.052 | 0.000 | 0.012 | 0.037 | 0.015 | 0.023 | 0.097 | 0.171 | 0.042 | 0.241 | 0.019 | 0.087 | 0.018 | 0.061 | 0.017 | 0.000 | 0.073 | 0.019 | 5.711 | 0.074 | 0.175 | 0.046 | 0.161 | 0.012 | 0.009 |
| GJ-1std | 0.116 | 1.285 | 0.025 | 0.000 | 0.019 | 0.020 | 0.016 | 0.011 | 0.087 | 0.054 | 0.028 | 0.250 | 0.008 | 0.063 | 0.010 | 0.049 | 0.011 | 0.014 | 0.031 | 0.019 | 4.437 | 0.047 | 0.048 | 0.036 | 0.103 | 0.006 | 0.007 |
| GJ-1std | 0.089 | 1.079 | 0.030 | 0.000 | 0.010 | 0.017 | 0.009 | 0.015 | 0.134 | 0.065 | 0.037 | 0.176 | 0.010 | 0.072 | 0.013 | 0.024 | 0.015 | 0.017 | 0.031 | 0.019 | 3.831 | 0.049 | 0.047 | 0.028 | 0.090 | 0.009 | 0.005 |
| Ple     | 0.109 | 0.882 | 0.023 | 0.000 | 0.019 | 0.021 | 0.013 | 0.014 | 0.081 | 0.065 | 0.030 | 0.140 | 0.000 | 0.040 | 0.012 | 0.037 | 0.010 | 0.015 | 0.048 | 0.014 | 4.982 | 0.037 | 0.051 | 0.026 | 0.104 | 0.006 | 0.006 |
| 91500   | 0.106 | 1.210 | 0.037 | 0.000 | 0.015 | 0.016 | 0.012 | 0.017 | 0.033 | 0.057 | 0.044 | 0.165 | 0.011 | 0.071 | 0.012 | 0.054 | 0.013 | 0.009 | 0.046 | 0.015 | 3.909 | 0.041 | 0.061 | 0.034 | 0.096 | 0.006 | 0.005 |
| 028-36  | 0.091 | 1.141 | 0.030 | 0.000 | 0.010 | 0.026 | 0.018 | 0.000 | 0.063 | 0.102 | 0.044 | 0.172 | 0.014 | 0.057 | 0.011 | 0.064 | 0.012 | 0.013 | 0.033 | 0.007 | 4.721 | 0.044 | 0.045 | 0.032 | 0.103 | 0.007 | 0.010 |
| 028-37  | 0.094 | 0.971 | 0.030 | 0.000 | 0.019 | 0.019 | 0.000 | 0.014 | 0.032 | 0.067 | 0.033 | 0.167 | 0.012 | 0.024 | 0.011 | 0.046 | 0.015 | 0.017 | 0.075 | 0.016 | 4.209 | 0.037 | 0.055 | 0.032 | 0.097 | 0.011 | 0.008 |
| 028-38  | 0.101 | 0.794 | 0.025 | 0.000 | 0.019 | 0.024 | 0.020 | 0.017 | 0.079 | 0.056 | 0.036 | 0.192 | 0.013 | 0.067 | 0.017 | 0.039 | 0.012 | 0.014 | 0.063 | 0.020 | 5.099 | 0.053 | 0.037 | 0.038 | 0.112 | 0.009 | 0.009 |
| 028-39  | 0.100 | 1.044 | 0.025 | 0.000 | 0.016 | 0.024 | 0.018 | 0.014 | 0.078 | 0.055 | 0.034 | 0.254 | 0.012 | 0.070 | 0.009 | 0.038 | 0.013 | 0.011 | 0.059 | 0.016 | 5.086 | 0.042 | 0.057 | 0.028 | 0.109 | 0.009 | 0.010 |
| 028-40  | 0.107 | 1.156 | 0.019 | 0.000 | 0.020 | 0.029 | 0.020 | 0.015 | 0.064 | 0.097 | 0.038 | 0.205 | 0.009 | 0.054 | 0.014 | 0.042 | 0.010 | 0.019 | 0.047 | 0.017 | 4.067 | 0.050 | 0.061 | 0.032 | 0.099 | 0.009 | 0.006 |
| 028-41  | 0.103 | 1.302 | 0.022 | 0.000 | 0.018 | 0.025 | 0.012 | 0.017 | 0.046 | 0.085 | 0.044 | 0.192 | 0.015 | 0.068 | 0.012 | 0.066 | 0.014 | 0.007 | 0.064 | 0.020 | 4.754 | 0.192 | 0.059 | 0.037 | 0.145 | 0.009 | 0.010 |
| 028-42  | 0.096 | 0.999 | 0.037 | 0.000 | 0.018 | 0.023 | 0.017 | 0.019 | 0.091 | 0.094 | 0.040 | 0.223 | 0.015 | 0.049 | 0.007 | 0.046 | 0.018 | 0.018 | 0.058 | 0.011 | 4.609 | 0.039 | 0.045 | 0.041 | 0.106 | 0.010 | 0.006 |
| 028-43  | 0.119 | 1.187 | 0.032 | 0.000 | 0.014 | 0.027 | 0.012 | 0.011 | 0.093 | 0.078 | 0.037 | 0.216 | 0.015 | 0.084 | 0.009 | 0.043 | 0.016 | 0.014 | 0.035 | 0.015 | 4.891 | 0.063 | 0.054 | 0.023 | 0.108 | 0.010 | 0.007 |
| 028-44  | 0.095 | 1.150 | 0.030 | 0.000 | 0.017 | 0.016 | 0.022 | 0.015 | 0.057 | 0.086 | 0.043 | 0.200 | 0.009 | 0.076 | 0.009 | 0.045 | 0.011 | 0.023 | 0.000 | 0.014 | 4.352 | 0.059 | 0.056 | 0.031 | 0.104 | 0.005 | 0.007 |
| 028-45  | 0.115 | 1.499 | 0.035 | 0.000 | 0.014 | 0.015 | 0.027 | 0.011 | 0.078 | 0.046 | 0.049 | 0.219 | 0.012 | 0.050 | 0.016 | 0.061 | 0.014 | 0.017 | 0.056 | 0.021 | 5.793 | 0.043 | 0.072 | 0.036 | 0.126 | 0.015 | 0.006 |
| SRM 610 | 0.185 | 2.258 | 0.034 | 0.000 | 0.021 | 0.038 | 0.025 | 0.016 | 0.051 | 0.085 | 0.068 | 0.256 | 0.013 | 0.074 | 0.019 | 0.065 | 0.009 | 0.021 | 0.095 | 0.033 | 7.351 | 0.072 | 0.101 | 0.043 | 0.165 | 0.014 | 0.013 |
| GJ-1std | 0.088 | 1.293 | 0.030 | 0.000 | 0.013 | 0.021 | 0.011 | 0.017 | 0.097 | 0.064 | 0.038 | 0.169 | 0.013 | 0.062 | 0.012 | 0.054 | 0.006 | 0.014 | 0.041 | 0.015 | 5.021 | 0.044 | 0.061 | 0.032 | 0.111 | 0.007 | 0.005 |
| GJ-1    | 0.137 | 1.612 | 0.075 | 0.000 | 0.019 | 0.034 | 0.014 | 0.018 | 0.091 | 0.146 | 0.060 | 0.259 | 0.017 | 0.082 | 0.013 | 0.105 | 0.000 | 0.014 | 0.050 | 0.026 | 6.018 | 0.081 | 0.104 | 0.067 | 0.162 | 0.007 | 0.006 |
| Ple     | 0.106 | 1.278 | 0.028 | 0.000 | 0.013 | 0.022 | 0.013 | 0.016 | 0.087 | 0.116 | 0.018 | 0.227 | 0.007 | 0.046 | 0.010 | 0.044 | 0.018 | 0.015 | 0.085 | 0.017 | 6.033 | 0.049 | 0.059 | 0.043 | 0.132 | 0.009 | 0.008 |
| 91500   | 0.124 | 1.368 | 0.033 | 0.000 | 0.015 | 0.045 | 0.021 | 0.017 | 0.088 | 0.130 | 0.044 | 0.209 | 0.020 | 0.066 | 0.025 | 0.061 | 0.025 | 0.025 | 0.067 | 0.018 | 6.748 | 0.074 | 0.078 | 0.037 | 0.149 | 0.014 | 0.011 |
| SRM 610 | 0.149 | 2.042 | 0.045 | 0.000 | 0.018 | 0.055 | 0.036 | 0.015 | 0.112 | 0.133 | 0.060 | 0.357 | 0.018 | 0.106 | 0.012 | 0.070 | 0.016 | 0.015 | 0.033 | 0.026 | 6.672 | 0.049 | 0.068 | 0.040 | 0.141 | 0.007 | 0.008 |
| GJ-1std | 0.102 | 1.105 | 0.035 | 0.000 | 0.007 | 0.023 | 0.009 | 0.016 | 0.053 | 0.052 | 0.044 | 0.171 | 0.011 | 0.063 | 0.006 | 0.038 | 0.005 | 0.014 | 0.042 | 0.012 | 4.028 | 0.038 | 0.045 | 0.025 | 0.088 | 0.009 | 0.007 |
| GJ-1std | 0.102 | 1.036 | 0.024 | 0.000 | 0.014 | 0.029 | 0.012 | 0.013 | 0.054 | 0.095 | 0.046 | 0.273 | 0.010 | 0.055 | 0.010 | 0.041 | 0.011 | 0.018 | 0.052 | 0.010 | 5.050 | 0.052 | 0.052 | 0.031 | 0.111 | 0.007 | 0.009 |
| Ple     | 0.112 | 1.250 | 0.029 | 0.000 | 0.014 | 0.024 | 0.021 | 0.018 | 0.061 | 0.063 | 0.035 | 0.178 | 0.008 | 0.049 | 0.010 | 0.041 | 0.015 | 0.013 | 0.000 | 0.015 | 4.792 | 0.038 | 0.045 | 0.027 | 0.100 | 0.007 | 0.009 |
| 91500   | 0.098 | 1.207 | 0.033 | 0.000 | 0.012 | 0.023 | 0.017 | 0.010 | 0.101 | 0.063 | 0.042 | 0.162 | 0.017 | 0.059 | 0.017 | 0.041 | 0.011 | 0.012 | 0.043 | 0.015 | 4.585 | 0.041 | 0.046 | 0.031 | 0.100 | 0.006 | 0.007 |
| 028-46  | 0.125 | 1.173 | 0.027 | 0.000 | 0.010 | 0.029 | 0.019 | 0.009 | 0.053 | 0.037 | 0.034 | 0.188 | 0.015 | 0.049 | 0.013 | 0.041 | 0.016 | 0.012 | 0.037 | 0.014 | 4.505 | 0.049 | 0.036 | 0.020 | 0.093 | 0.006 | 0.006 |
| 028-47  | 0.171 | 1.395 | 0.070 | 0.000 | 0.000 | 0.055 | 0.026 | 0.028 | 0.121 | 0.145 | 0.084 | 0.198 | 0.000 | 0.089 | 0.023 | 0.102 | 0.000 | 0.024 | 0.085 | 0.043 | 7.557 | 0.140 | 0.088 | 0.086 | 0.204 | 0.000 | 0.010 |
| 028-48  | 0.099 | 1.241 | 0.019 | 0.000 | 0.014 | 0.023 | 0.013 | 0.011 | 0.074 | 0.064 | 0.032 | 0.168 | 0.017 | 0.064 | 0.014 | 0.046 | 0.000 | 0.015 | 0.022 | 0.014 | 4.823 | 0.046 | 0.046 | 0.027 | 0.103 | 0.009 | 0.005 |
| 028-49  | 0.092 | 1.058 | 0.031 | 0.000 | 0.016 | 0.025 | 0.016 | 0.014 | 0.053 | 0.073 | 0.040 | 0.178 | 0.011 | 0.077 | 0.012 | 0.063 | 0.018 | 0.011 | 0.080 | 0.016 | 4.638 | 0.048 | 0.047 | 0.027 | 0.101 | 0.005 | 0.007 |
| 028-50  | 0.122 | 1.144 | 0.035 | 0.000 | 0.014 | 0.026 | 0.015 | 0.017 | 0.062 | 0.053 | 0.029 | 0.166 | 0.014 | 0.062 | 0.016 | 0.039 | 0.011 | 0.022 | 0.056 | 0.012 | 4.248 | 0.030 | 0.035 | 0.022 | 0.086 | 0.009 | 0.006 |
| 028-51  | 0.112 | 1.232 | 0.034 | 0.000 | 0.011 | 0.023 | 0.021 | 0.013 | 0.088 | 0.120 | 0.048 | 0.172 | 0.011 | 0.046 | 0.012 | 0.045 | 0.014 | 0.014 | 0.062 | 0.010 | 4.183 | 0.038 | 0.047 | 0.038 | 0.098 | 0.007 | 0.007 |
| 028-52  | 0.084 | 1.214 | 0.025 | 0.000 | 0.012 | 0.020 | 0.016 | 0.012 | 0.060 | 0.063 | 0.029 | 0.190 | 0.018 | 0.057 | 0.015 | 0.075 | 0.014 | 0.013 | 0.048 | 0.022 | 3.973 | 0.034 | 0.043 | 0.032 | 0.090 | 0.007 | 0.007 |
| 028-53  | 0.109 | 1.110 | 0.029 | 0.000 | 0.013 | 0.031 | 0.018 | 0.013 | 0.126 | 0.056 | 0.044 | 0.197 | 0.015 | 0.087 | 0.000 | 0.051 | 0.014 | 0.013 | 0.040 | 0.021 | 5.008 | 0.054 | 0.050 | 0.030 | 0.110 | 0.008 | 0.007 |
| 028-54  | 0.091 | 1.253 | 0.031 | 0.000 | 0.018 | 0.026 | 0.010 | 0.020 | 0.101 | 0.055 | 0.038 | 0.201 | 0.012 | 0.072 | 0.011 | 0.056 | 0.017 | 0.016 | 0.000 | 0.014 | 4.344 | 0.045 | 0.074 | 0.034 | 0.106 | 0.009 | 0.008 |
| 028-55  | 0.074 | 1.265 | 0.032 | 0.000 | 0.017 | 0.023 | 0.019 | 0.015 | 0.062 | 0.065 | 0.039 | 0.188 | 0.011 | 0.087 | 0.009 | 0.047 | 0.008 | 0.014 | 0.076 | 0.007 | 4.231 | 0.055 | 0.055 | 0.034 | 0.103 | 0.009 | 0.007 |
| SRM 610 | 0.335 | 1.557 | 0.060 | 0.000 | 0.039 | 0.029 | 0.032 | 0.025 | 0.113 | 0.113 | 0.047 | 0.290 | 0.017 | 0.084 | 0.016 | 0.073 | 0.015 | 0.033 | 0.066 | 0.015 | 6.674 | 0.089 | 0.071 | 0.045 | 0.154 | 0.017 | 0.010 |

|         |       |       |       |       |       |       |       |       |       |       |       |       |       |       |       |       |       |       |       |       |       |       |       |       |       |       |       |
|---------|-------|-------|-------|-------|-------|-------|-------|-------|-------|-------|-------|-------|-------|-------|-------|-------|-------|-------|-------|-------|-------|-------|-------|-------|-------|-------|-------|
| GJ-1std | 0.086 | 1.347 | 0.034 | 0.000 | 0.021 | 0.028 | 0.018 | 0.015 | 0.085 | 0.039 | 0.051 | 0.254 | 0.012 | 0.060 | 0.009 | 0.059 | 0.017 | 0.018 | 0.049 | 0.010 | 3.791 | 0.043 | 0.066 | 0.027 | 0.092 | 0.005 | 0.008 |
| GJ-1std | 0.084 | 1.329 | 0.031 | 0.000 | 0.021 | 0.019 | 0.018 | 0.011 | 0.087 | 0.085 | 0.046 | 0.184 | 0.010 | 0.070 | 0.009 | 0.058 | 0.013 | 0.014 | 0.039 | 0.013 | 4.045 | 0.043 | 0.047 | 0.029 | 0.092 | 0.005 | 0.007 |
| Ple     | 0.098 | 1.136 | 0.031 | 0.000 | 0.014 | 0.019 | 0.016 | 0.013 | 0.060 | 0.080 | 0.047 | 0.205 | 0.015 | 0.057 | 0.010 | 0.032 | 0.012 | 0.017 | 0.054 | 0.014 | 5.685 | 0.040 | 0.044 | 0.030 | 0.114 | 0.006 | 0.006 |
| 91500   | 0.089 | 1.282 | 0.033 | 0.000 | 0.015 | 0.022 | 0.015 | 0.014 | 0.055 | 0.055 | 0.048 | 0.193 | 0.014 | 0.052 | 0.014 | 0.050 | 0.015 | 0.014 | 0.032 | 0.014 | 4.619 | 0.042 | 0.045 | 0.026 | 0.098 | 0.008 | 0.005 |
| 028-56  | 0.154 | 1.575 | 0.035 | 0.000 | 0.022 | 0.021 | 0.000 | 0.018 | 0.000 | 0.110 | 0.060 | 0.224 | 0.017 | 0.150 | 0.013 | 0.077 | 0.017 | 0.013 | 0.077 | 0.021 | 6.740 | 0.079 | 0.093 | 0.099 | 0.186 | 0.008 | 0.007 |
| 028-57  | 0.103 | 1.260 | 0.035 | 0.000 | 0.020 | 0.029 | 0.015 | 0.009 | 0.063 | 0.075 | 0.051 | 0.169 | 0.008 | 0.040 | 0.013 | 0.048 | 0.014 | 0.011 | 0.058 | 0.016 | 4.950 | 0.043 | 0.052 | 0.034 | 0.109 | 0.004 | 0.005 |
| 028-58  | 0.109 | 1.158 | 0.028 | 0.000 | 0.018 | 0.031 | 0.011 | 0.013 | 0.103 | 0.073 | 0.036 | 0.281 | 0.013 | 0.051 | 0.012 | 0.057 | 0.016 | 0.017 | 0.054 | 0.011 | 5.085 | 0.044 | 0.061 | 0.040 | 0.116 | 0.007 | 0.005 |
| 028-59  | 0.087 | 1.219 | 0.047 | 0.000 | 0.020 | 0.014 | 0.011 | 0.014 | 0.050 | 0.111 | 0.049 | 0.243 | 0.022 | 0.082 | 0.013 | 0.059 | 0.018 | 0.015 | 0.042 | 0.024 | 5.483 | 0.061 | 0.045 | 0.028 | 0.116 | 0.007 | 0.004 |
| 028-60  | 0.096 | 1.365 | 0.030 | 0.000 | 0.009 | 0.019 | 0.023 | 0.016 | 0.086 | 0.073 | 0.032 | 0.245 | 0.015 | 0.051 | 0.012 | 0.053 | 0.009 | 0.017 | 0.131 | 0.011 | 5.189 | 0.045 | 0.043 | 0.036 | 0.112 | 0.008 | 0.008 |
| 028-61  | 0.082 | 1.176 | 0.035 | 0.000 | 0.019 | 0.036 | 0.018 | 0.008 | 0.051 | 0.093 | 0.047 | 0.195 | 0.011 | 0.027 | 0.010 | 0.059 | 0.013 | 0.010 | 0.035 | 0.014 | 5.456 | 0.038 | 0.057 | 0.032 | 0.115 | 0.006 | 0.005 |
| 028-62  | 0.102 | 1.043 | 0.033 | 0.000 | 0.008 | 0.020 | 0.015 | 0.000 | 0.084 | 0.081 | 0.039 | 0.196 | 0.014 | 0.068 | 0.016 | 0.043 | 0.021 | 0.021 | 0.034 | 0.011 | 4.921 | 0.050 | 0.042 | 0.024 | 0.103 | 0.008 | 0.007 |
| 028-63  | 0.225 | 3.162 | 0.064 | 0.000 | 0.047 | 0.000 | 0.000 | 0.032 | 0.193 | 0.000 | 0.101 | 0.507 | 0.036 | 0.000 | 0.036 | 0.102 | 0.000 | 0.000 | 0.000 | 0.000 | 6.522 | 0.136 | 0.070 | 0.063 | 0.173 | 0.015 | 0.015 |
| 028-64  | 0.087 | 1.189 | 0.032 | 0.000 | 0.008 | 0.030 | 0.027 | 0.015 | 0.000 | 0.086 | 0.042 | 0.197 | 0.010 | 0.048 | 0.015 | 0.025 | 0.010 | 0.013 | 0.059 | 0.014 | 4.947 | 0.043 | 0.035 | 0.027 | 0.102 | 0.005 | 0.007 |
| 028-65  | 0.076 | 1.194 | 0.034 | 0.000 | 0.014 | 0.022 | 0.010 | 0.010 | 0.080 | 0.069 | 0.028 | 0.171 | 0.015 | 0.062 | 0.013 | 0.050 | 0.020 | 0.014 | 0.040 | 0.011 | 4.571 | 0.043 | 0.037 | 0.036 | 0.101 | 0.005 | 0.007 |
| SRM 610 | 0.151 | 1.765 | 0.052 | 0.000 | 0.023 | 0.026 | 0.011 | 0.016 | 0.068 | 0.135 | 0.051 | 0.253 | 0.019 | 0.077 | 0.021 | 0.074 | 0.019 | 0.013 | 0.083 | 0.021 | 7.886 | 0.060 | 0.251 | 0.061 | 0.212 | 0.013 | 0.007 |
| GJ-1std | 0.077 | 1.167 | 0.040 | 0.000 | 0.014 | 0.020 | 0.012 | 0.015 | 0.057 | 0.000 | 0.035 | 0.237 | 0.006 | 0.048 | 0.009 | 0.051 | 0.015 | 0.013 | 0.045 | 0.014 | 5.316 | 0.057 | 0.050 | 0.022 | 0.111 | 0.010 | 0.006 |
| GJ-1std | 0.108 | 1.264 | 0.029 | 0.000 | 0.011 | 0.018 | 0.018 | 0.020 | 0.047 | 0.112 | 0.025 | 0.252 | 0.010 | 0.070 | 0.015 | 0.044 | 0.012 | 0.013 | 0.050 | 0.013 | 4.540 | 0.046 | 0.041 | 0.022 | 0.095 | 0.008 | 0.005 |
| Ple     | 0.093 | 1.106 | 0.035 | 0.000 | 0.018 | 0.022 | 0.019 | 0.015 | 0.066 | 0.041 | 0.040 | 0.197 | 0.017 | 0.082 | 0.016 | 0.038 | 0.008 | 0.018 | 0.050 | 0.007 | 4.762 | 0.054 | 0.045 | 0.032 | 0.107 | 0.006 | 0.006 |
| 91500   | 0.099 | 1.533 | 0.046 | 0.000 | 0.011 | 0.026 | 0.010 | 0.017 | 0.078 | 0.068 | 0.041 | 0.171 | 0.019 | 0.061 | 0.009 | 0.062 | 0.012 | 0.013 | 0.032 | 0.013 | 3.666 | 0.059 | 0.051 | 0.023 | 0.089 | 0.008 | 0.006 |
| 028-66  | 0.079 | 1.134 | 0.028 | 0.000 | 0.013 | 0.020 | 0.015 | 0.012 | 0.082 | 0.065 | 0.044 | 0.170 | 0.017 | 0.050 | 0.012 | 0.055 | 0.015 | 0.012 | 0.031 | 0.014 | 4.896 | 0.050 | 0.043 | 0.026 | 0.104 | 0.011 | 0.005 |
| 028-67  | 0.099 | 1.196 | 0.034 | 0.000 | 0.020 | 0.020 | 0.020 | 0.016 | 0.078 | 0.056 | 0.036 | 0.170 | 0.015 | 0.053 | 0.014 | 0.064 | 0.008 | 0.014 | 0.050 | 0.013 | 4.755 | 0.055 | 0.046 | 0.023 | 0.102 | 0.007 | 0.006 |
| 028-68  | 0.091 | 1.248 | 0.032 | 0.000 | 0.000 | 0.025 | 0.018 | 0.011 | 0.034 | 0.069 | 0.032 | 0.198 | 0.013 | 0.050 | 0.009 | 0.041 | 0.021 | 0.013 | 0.040 | 0.020 | 4.335 | 0.064 | 0.046 | 0.038 | 0.106 | 0.006 | 0.009 |
| 028-69  | 0.087 | 1.351 | 0.039 | 0.000 | 0.023 | 0.022 | 0.018 | 0.016 | 0.058 | 0.000 | 0.039 | 0.180 | 0.019 | 0.054 | 0.012 | 0.051 | 0.014 | 0.017 | 0.040 | 0.016 | 4.836 | 0.049 | 0.043 | 0.038 | 0.109 | 0.009 | 0.006 |
| 028-70  | 0.000 | 0.000 | 0.000 | 0.000 | 0.000 | 0.000 | 0.000 | 0.000 | 0.000 | 0.000 | 0.000 | 0.000 | 0.000 | 0.000 | 0.000 | 0.000 | 0.000 | 0.000 | 0.000 | 0.000 | 0.000 | 0.000 | 0.000 | 0.000 | 0.000 | 0.000 | 0.000 |
| 028-71  | 0.395 | 3.769 | 0.124 | 0.000 | 0.000 | 0.227 | 0.000 | 0.000 | 0.498 | 0.000 | 0.172 | 0.601 | 0.000 | 0.363 | 0.000 | 0.000 | 0.088 | 0.097 | 0.000 | 0.000 | 8.710 | 0.000 | 0.000 | 0.101 | 0.175 | 0.000 | 0.037 |
| 028-72  | 0.090 | 1.300 | 0.035 | 0.000 | 0.016 | 0.019 | 0.014 | 0.008 | 0.058 | 0.079 | 0.023 | 0.208 | 0.006 | 0.071 | 0.000 | 0.041 | 0.019 | 0.011 | 0.033 | 0.021 | 4.746 | 0.039 | 0.048 | 0.029 | 0.102 | 0.009 | 0.007 |
| 028-73  | 0.107 | 1.082 | 0.041 | 0.000 | 0.012 | 0.018 | 0.020 | 0.015 | 0.079 | 0.057 | 0.031 | 0.197 | 0.019 | 0.062 | 0.018 | 0.049 | 0.008 | 0.007 | 0.040 | 0.016 | 4.416 | 0.046 | 0.059 | 0.035 | 0.104 | 0.006 | 0.005 |
| 028-74  | 0.089 | 1.259 | 0.038 | 0.000 | 0.012 | 0.017 | 0.010 | 0.006 | 0.034 | 0.057 | 0.029 | 0.211 | 0.009 | 0.085 | 0.012 | 0.051 | 0.016 | 0.013 | 0.046 | 0.016 | 4.125 | 0.041 | 0.052 | 0.032 | 0.096 | 0.008 | 0.006 |
| 028-75  | 0.078 | 1.264 | 0.034 | 0.000 | 0.017 | 0.035 | 0.012 | 0.015 | 0.047 | 0.040 | 0.043 | 0.169 | 0.018 | 0.084 | 0.011 | 0.060 | 0.017 | 0.007 | 0.063 | 0.007 | 4.408 | 0.041 | 0.041 | 0.024 | 0.093 | 0.008 | 0.006 |
| SRM 610 | 0.161 | 1.493 | 0.044 | 0.000 | 0.017 | 0.039 | 0.025 | 0.014 | 0.084 | 0.100 | 0.062 | 0.316 | 0.025 | 0.108 | 0.009 | 0.074 | 0.022 | 0.029 | 0.280 | 0.029 | 6.933 | 0.082 | 0.076 | 0.048 | 0.159 | 0.009 | 0.010 |
| GJ-1std | 0.106 | 1.087 | 0.029 | 0.000 | 0.021 | 0.018 | 0.020 | 0.015 | 0.047 | 0.040 | 0.044 | 0.195 | 0.010 | 0.053 | 0.009 | 0.051 | 0.021 | 0.011 | 0.045 | 0.016 | 4.753 | 0.040 | 0.046 | 0.028 | 0.101 | 0.006 | 0.006 |
| GJ-1std | 0.089 | 1.172 | 0.035 | 0.000 | 0.018 | 0.024 | 0.016 | 0.012 | 0.102 | 0.069 | 0.023 | 0.182 | 0.015 | 0.068 | 0.017 | 0.055 | 0.014 | 0.007 | 0.046 | 0.013 | 4.659 | 0.052 | 0.049 | 0.025 | 0.102 | 0.007 | 0.006 |
| Ple     | 0.081 | 1.267 | 0.037 | 0.000 | 0.020 | 0.024 | 0.014 | 0.018 | 0.035 | 0.058 | 0.033 | 0.158 | 0.015 | 0.065 | 0.016 | 0.050 | 0.012 | 0.011 | 0.047 | 0.000 | 4.826 | 0.039 | 0.031 | 0.043 | 0.106 | 0.006 | 0.006 |
| 91500   | 0.069 | 1.035 | 0.028 | 0.000 | 0.014 | 0.039 | 0.014 | 0.016 | 0.058 | 0.070 | 0.039 | 0.293 | 0.012 | 0.042 | 0.017 | 0.067 | 0.012 | 0.011 | 0.068 | 0.007 | 4.560 | 0.048 | 0.055 | 0.031 | 0.104 | 0.008 | 0.004 |
| 028-76  | 0.100 | 1.761 | 0.039 | 0.000 | 0.025 | 0.028 | 0.017 | 0.011 | 0.078 | 0.077 | 0.048 | 0.174 | 0.012 | 0.047 | 0.000 | 0.071 | 0.017 | 0.020 | 0.067 | 0.026 | 5.649 | 0.060 | 0.054 | 0.023 | 0.117 | 0.006 | 0.006 |
| 028-77  | 0.092 | 0.990 | 0.031 | 0.000 | 0.012 | 0.025 | 0.018 | 0.010 | 0.058 | 0.069 | 0.031 | 0.169 | 0.013 | 0.071 | 0.015 | 0.042 | 0.015 | 0.016 | 0.046 | 0.013 | 4.632 | 0.047 | 0.038 | 0.023 | 0.096 | 0.005 | 0.006 |
| 028-78  | 0.091 | 1.437 | 0.044 | 0.000 | 0.014 | 0.026 | 0.022 | 0.012 | 0.048 | 0.080 | 0.043 | 0.223 | 0.011 | 0.085 | 0.011 | 0.065 | 0.016 | 0.011 | 0.040 | 0.014 | 4.963 | 0.051 | 0.055 | 0.032 | 0.111 | 0.007 | 0.010 |
| 028-79  | 0.082 | 1.157 | 0.038 | 0.000 | 0.012 | 0.025 | 0.019 | 0.011 | 0.034 | 0.058 | 0.030 | 0.217 | 0.012 | 0.065 | 0.006 | 0.052 | 0.010 | 0.009 | 0.033 | 0.010 | 5.209 | 0.059 | 0.049 | 0.039 | 0.119 | 0.007 | 0.010 |
| 028-80  | 0.090 | 1.001 | 0.041 | 0.000 | 0.008 | 0.021 | 0.012 | 0.015 | 0.057 | 0.069 | 0.041 | 0.224 | 0.006 | 0.098 | 0.012 | 0.061 | 0.008 | 0.015 | 0.060 | 0.018 | 4.399 | 0.046 | 0.051 | 0.030 | 0.100 | 0.007 | 0.006 |
| 028-81  | 0.090 | 1.407 | 0.034 | 0.000 | 0.011 | 0.022 | 0.018 | 0.013 | 0.065 | 0.078 | 0.035 | 0.170 | 0.006 | 0.042 | 0.009 | 0.044 | 0.019 | 0.020 | 0.045 | 0.010 | 3.977 | 0.040 | 0.042 | 0.028 | 0.089 | 0.004 | 0.005 |
| 028-82  | 0.086 | 1.406 | 0.033 | 0.000 | 0.008 | 0.023 | 0.017 | 0.018 | 0.034 | 0.071 | 0.051 | 0.185 | 0.018 | 0.049 | 0.011 | 0.039 | 0.016 | 0.014 | 0.041 | 0.020 | 4.979 | 0.047 | 0.048 | 0.026 | 0.105 | 0.007 | 0.007 |

|         |       |       |       |       |       |       |       |       |       |       |       |       |       |       |       |       |       |       |       |       |        |       |       |       |       |       |       |
|---------|-------|-------|-------|-------|-------|-------|-------|-------|-------|-------|-------|-------|-------|-------|-------|-------|-------|-------|-------|-------|--------|-------|-------|-------|-------|-------|-------|
| 028-83  | 0.092 | 1.427 | 0.037 | 0.000 | 0.012 | 0.021 | 0.019 | 0.012 | 0.058 | 0.070 | 0.038 | 0.260 | 0.016 | 0.063 | 0.006 | 0.052 | 0.012 | 0.016 | 0.033 | 0.017 | 4.290  | 0.052 | 0.049 | 0.026 | 0.097 | 0.006 | 0.008 |
| 028-84  | 0.089 | 1.342 | 0.045 | 0.000 | 0.008 | 0.026 | 0.007 | 0.015 | 0.066 | 0.106 | 0.028 | 0.222 | 0.017 | 0.074 | 0.015 | 0.048 | 0.010 | 0.011 | 0.073 | 0.010 | 3.669  | 0.040 | 0.054 | 0.026 | 0.086 | 0.004 | 0.006 |
| 028-85  | 0.095 | 1.175 | 0.039 | 0.000 | 0.014 | 0.019 | 0.014 | 0.015 | 0.047 | 0.091 | 0.041 | 0.207 | 0.012 | 0.064 | 0.015 | 0.050 | 0.013 | 0.015 | 0.150 | 0.020 | 5.679  | 0.046 | 0.053 | 0.030 | 0.118 | 0.006 | 0.009 |
| SRM 610 | 0.129 | 2.193 | 0.056 | 0.000 | 0.017 | 0.033 | 0.020 | 0.025 | 0.000 | 0.101 | 0.061 | 0.344 | 0.020 | 0.150 | 0.016 | 0.056 | 0.026 | 0.028 | 0.113 | 0.028 | 6.208  | 0.071 | 0.071 | 0.043 | 0.142 | 0.011 | 0.010 |
| GJ-1std | 0.081 | 1.119 | 0.039 | 0.000 | 0.022 | 0.018 | 0.018 | 0.011 | 0.089 | 0.042 | 0.039 | 0.174 | 0.015 | 0.055 | 0.013 | 0.046 | 0.019 | 0.016 | 0.061 | 0.011 | 4.341  | 0.139 | 0.140 | 0.035 | 0.144 | 0.007 | 0.007 |
| GJ-1std | 0.098 | 1.259 | 0.038 | 0.000 | 0.008 | 0.023 | 0.017 | 0.018 | 0.059 | 0.084 | 0.042 | 0.202 | 0.014 | 0.055 | 0.011 | 0.056 | 0.011 | 0.018 | 0.082 | 0.018 | 5.135  | 0.053 | 0.041 | 0.029 | 0.109 | 0.006 | 0.006 |
| Ple     | 0.076 | 1.245 | 0.027 | 0.000 | 0.014 | 0.029 | 0.014 | 0.012 | 0.077 | 0.000 | 0.036 | 0.195 | 0.015 | 0.053 | 0.011 | 0.055 | 0.014 | 0.014 | 0.032 | 0.016 | 4.809  | 0.054 | 0.045 | 0.048 | 0.116 | 0.011 | 0.007 |
| 91500   | 0.097 | 1.365 | 0.036 | 0.000 | 0.012 | 0.024 | 0.018 | 0.015 | 0.049 | 0.121 | 0.036 | 0.188 | 0.009 | 0.050 | 0.011 | 0.066 | 0.017 | 0.015 | 0.069 | 0.015 | 4.079  | 0.050 | 0.055 | 0.026 | 0.095 | 0.008 | 0.008 |
| 028-86  | 0.094 | 1.145 | 0.035 | 0.000 | 0.012 | 0.018 | 0.007 | 0.008 | 0.086 | 0.090 | 0.046 | 0.235 | 0.014 | 0.110 | 0.017 | 0.043 | 0.012 | 0.016 | 0.047 | 0.013 | 5.373  | 0.038 | 0.054 | 0.033 | 0.114 | 0.005 | 0.008 |
| 028-87  | 0.092 | 1.024 | 0.046 | 0.000 | 0.019 | 0.021 | 0.022 | 0.010 | 0.058 | 0.070 | 0.048 | 0.199 | 0.016 | 0.059 | 0.013 | 0.052 | 0.016 | 0.011 | 0.050 | 0.015 | 4.613  | 0.052 | 0.052 | 0.029 | 0.104 | 0.006 | 0.007 |
| 028-88  | 0.083 | 1.174 | 0.033 | 0.000 | 0.012 | 0.032 | 0.015 | 0.008 | 0.084 | 0.111 | 0.039 | 0.186 | 0.019 | 0.044 | 0.013 | 0.046 | 0.011 | 0.013 | 0.062 | 0.017 | 5.363  | 0.040 | 0.071 | 0.030 | 0.116 | 0.007 | 0.006 |
| 028-89  | 0.095 | 1.299 | 0.032 | 0.000 | 0.012 | 0.024 | 0.025 | 0.013 | 0.068 | 0.091 | 0.040 | 0.237 | 0.016 | 0.036 | 0.017 | 0.043 | 0.009 | 0.019 | 0.056 | 0.015 | 3.507  | 0.050 | 0.042 | 0.026 | 0.084 | 0.005 | 0.008 |
| 028-90  | 0.080 | 1.391 | 0.029 | 0.000 | 0.023 | 0.024 | 0.020 | 0.014 | 0.083 | 0.071 | 0.032 | 0.243 | 0.011 | 0.036 | 0.009 | 0.057 | 0.006 | 0.020 | 0.055 | 0.016 | 4.705  | 0.041 | 0.036 | 0.036 | 0.103 | 0.006 | 0.007 |
| 91500   | 0.089 | 1.181 | 0.033 | 0.000 | 0.014 | 0.037 | 0.025 | 0.017 | 0.049 | 0.098 | 0.042 | 0.183 | 0.009 | 0.074 | 0.009 | 0.062 | 0.014 | 0.021 | 0.033 | 0.011 | 4.145  | 0.051 | 0.061 | 0.027 | 0.098 | 0.005 | 0.008 |
| Ple     | 0.087 | 1.342 | 0.034 | 0.000 | 0.017 | 0.016 | 0.018 | 0.014 | 0.049 | 0.059 | 0.042 | 0.214 | 0.013 | 0.060 | 0.013 | 0.051 | 0.011 | 0.018 | 0.047 | 0.011 | 5.181  | 0.048 | 0.049 | 0.030 | 0.110 | 0.008 | 0.005 |
| GJ-1std | 0.079 | 1.373 | 0.046 | 0.000 | 0.012 | 0.022 | 0.020 | 0.015 | 0.000 | 0.091 | 0.049 | 0.254 | 0.016 | 0.056 | 0.011 | 0.044 | 0.011 | 0.012 | 0.047 | 0.022 | 4.874  | 0.048 | 0.046 | 0.030 | 0.105 | 0.007 | 0.006 |
| GJ-1std | 0.079 | 1.427 | 0.044 | 0.000 | 0.030 | 0.026 | 0.019 | 0.018 | 0.049 | 0.091 | 0.039 | 0.195 | 0.014 | 0.056 | 0.014 | 0.054 | 0.020 | 0.019 | 0.074 | 0.013 | 4.174  | 0.055 | 0.072 | 0.031 | 0.104 | 0.008 | 0.011 |
| SRM 610 | 0.140 | 2.113 | 0.048 | 0.000 | 0.021 | 0.042 | 0.026 | 0.029 | 0.099 | 0.062 | 0.047 | 0.290 | 0.016 | 0.065 | 0.017 | 0.103 | 0.016 | 0.024 | 0.087 | 0.022 | 7.999  | 0.063 | 0.059 | 0.043 | 0.162 | 0.010 | 0.006 |
| SRM 610 | 0.145 | 1.929 | 0.091 | 0.000 | 0.431 | 0.248 | 0.118 | 0.123 | 0.077 | 0.149 | 0.116 | 0.283 | 0.254 | 0.083 | 0.445 | 0.126 | 0.334 | 0.227 | 0.096 | 0.086 | 6.514  | 0.403 | 0.477 | 0.507 | 0.560 | 0.061 | 0.195 |
| GJ-1std | 0.111 | 1.112 | 0.048 | 0.000 | 0.024 | 0.026 | 0.045 | 0.090 | 0.043 | 0.341 | 0.181 | 0.156 | 0.017 | 0.057 | 0.157 | 0.114 | 0.069 | 0.100 | 0.281 | 0.071 | 4.386  | 0.379 | 0.090 | 0.035 | 0.191 | 0.063 | 0.045 |
| GJ-1std | 0.104 | 1.165 | 0.148 | 0.000 | 0.092 | 0.075 | 0.077 | 0.066 | 0.045 | 0.074 | 0.079 | 0.181 | 0.028 | 0.132 | 0.039 | 0.049 | 0.074 | 0.072 | 0.071 | 0.115 | 4.362  | 0.063 | 0.062 | 0.040 | 0.111 | 0.086 | 0.091 |
| Ple     | 0.104 | 1.459 | 0.035 | 0.000 | 0.011 | 0.036 | 0.039 | 0.014 | 0.055 | 0.066 | 0.035 | 0.181 | 0.052 | 0.072 | 0.050 | 0.068 | 0.353 | 0.042 | 0.059 | 0.016 | 5.350  | 0.056 | 0.059 | 0.048 | 0.127 | 0.023 | 0.110 |
| 91500   | 0.085 | 1.371 | 0.038 | 0.000 | 0.023 | 0.019 | 0.021 | 0.017 | 0.298 | 0.077 | 0.045 | 0.258 | 0.009 | 0.070 | 0.083 | 0.047 | 0.039 | 0.027 | 0.060 | 0.039 | 4.768  | 0.050 | 0.068 | 0.038 | 0.114 | 0.005 | 0.031 |
| 028-91  | 0.088 | 1.165 | 0.084 | 0.000 | 0.019 | 0.030 | 0.023 | 0.008 | 0.083 | 0.054 | 0.032 | 0.225 | 0.012 | 0.057 | 0.006 | 0.045 | 0.014 | 0.015 | 0.038 | 0.021 | 4.615  | 0.043 | 0.045 | 0.040 | 0.106 | 0.018 | 0.064 |
| 028-92  | 0.093 | 1.450 | 0.068 | 0.000 | 0.020 | 0.023 | 0.014 | 0.017 | 0.095 | 0.055 | 0.047 | 0.219 | 0.012 | 0.073 | 0.017 | 0.034 | 0.010 | 0.014 | 0.058 | 0.019 | 16.303 | 0.054 | 0.135 | 0.025 | 0.284 | 0.014 | 0.050 |
| 028-93  | 0.091 | 1.173 | 0.048 | 0.000 | 0.011 | 0.027 | 0.033 | 0.014 | 0.064 | 0.067 | 0.033 | 0.225 | 0.074 | 0.061 | 0.022 | 0.047 | 0.014 | 0.011 | 0.040 | 0.010 | 4.993  | 0.046 | 0.034 | 0.021 | 0.100 | 0.007 | 0.008 |
| 028-94  | 0.087 | 1.327 | 0.034 | 0.000 | 0.008 | 0.024 | 0.018 | 0.210 | 0.070 | 0.066 | 0.028 | 0.215 | 0.012 | 0.072 | 0.018 | 0.034 | 0.016 | 0.016 | 0.049 | 0.012 | 4.622  | 0.048 | 0.038 | 0.041 | 0.106 | 0.008 | 0.003 |
| 028-95  | 0.087 | 1.151 | 0.031 | 0.000 | 0.015 | 0.044 | 0.020 | 0.018 | 0.064 | 0.000 | 0.032 | 0.210 | 0.014 | 0.048 | 0.066 | 0.030 | 0.008 | 0.013 | 0.084 | 0.013 | 5.175  | 0.040 | 0.039 | 0.035 | 0.109 | 0.018 | 0.012 |
| 028-96  | 0.090 | 1.107 | 0.035 | 0.000 | 0.253 | 0.014 | 0.021 | 0.016 | 0.033 | 0.094 | 0.318 | 0.255 | 0.010 | 0.067 | 0.012 | 0.030 | 0.019 | 0.023 | 0.023 | 0.025 | 4.494  | 0.040 | 0.042 | 0.025 | 0.095 | 0.005 | 0.006 |
| 028-97  | 0.071 | 1.151 | 0.039 | 0.000 | 0.000 | 0.027 | 0.017 | 0.011 | 0.114 | 0.097 | 0.023 | 0.204 | 0.022 | 0.049 | 0.026 | 0.058 | 0.006 | 0.017 | 0.041 | 0.022 | 5.191  | 0.040 | 0.042 | 0.193 | 0.193 | 0.005 | 0.006 |
| 028-98  | 0.097 | 1.323 | 0.029 | 0.000 | 0.011 | 0.018 | 0.025 | 0.016 | 0.065 | 0.056 | 0.045 | 0.228 | 0.012 | 0.072 | 0.013 | 0.031 | 0.024 | 0.017 | 0.083 | 0.015 | 4.277  | 0.037 | 0.040 | 0.025 | 0.091 | 0.013 | 0.006 |
| 028-99  | 0.100 | 1.121 | 0.025 | 0.000 | 0.018 | 0.028 | 0.020 | 0.014 | 0.048 | 0.058 | 0.035 | 0.172 | 0.018 | 0.068 | 0.016 | 0.077 | 0.020 | 0.013 | 0.047 | 0.018 | 4.989  | 0.036 | 0.045 | 0.031 | 0.105 | 0.008 | 0.004 |
| 028-100 | 0.098 | 1.354 | 0.034 | 0.000 | 0.011 | 0.021 | 0.012 | 0.013 | 0.082 | 0.070 | 0.034 | 0.204 | 0.012 | 0.060 | 0.013 | 0.040 | 0.012 | 0.013 | 0.047 | 0.023 | 5.120  | 0.046 | 0.053 | 0.024 | 0.107 | 0.006 | 0.005 |
| SRM 610 | 0.142 | 1.338 | 0.048 | 0.000 | 0.020 | 0.037 | 0.030 | 0.023 | 0.070 | 0.102 | 0.052 | 0.275 | 0.026 | 0.097 | 0.021 | 0.126 | 0.029 | 0.014 | 0.060 | 0.029 | 6.758  | 0.069 | 0.077 | 0.042 | 0.150 | 0.009 | 0.016 |
| GJ-1std | 0.080 | 1.177 | 0.037 | 0.000 | 0.013 | 0.020 | 0.020 | 0.014 | 0.084 | 0.054 | 0.030 | 0.172 | 0.010 | 0.070 | 0.011 | 0.070 | 0.010 | 0.015 | 0.039 | 0.018 | 4.493  | 0.040 | 0.051 | 0.021 | 0.095 | 0.032 | 0.007 |
| GJ-1std | 0.101 | 1.070 | 0.029 | 0.000 | 0.017 | 0.021 | 0.019 | 0.021 | 0.077 | 0.085 | 0.044 | 0.185 | 0.019 | 0.067 | 0.020 | 0.044 | 0.012 | 0.013 | 0.058 | 0.018 | 4.267  | 0.037 | 0.042 | 0.024 | 0.091 | 0.005 | 0.062 |
| Ple     | 0.086 | 1.270 | 0.028 | 0.000 | 0.018 | 0.017 | 0.015 | 0.009 | 0.045 | 0.038 | 0.031 | 0.180 | 0.010 | 0.059 | 0.012 | 0.037 | 0.012 | 0.015 | 0.054 | 0.014 | 4.977  | 0.042 | 0.037 | 0.032 | 0.105 | 0.008 | 0.005 |
| 91500   | 0.080 | 1.161 | 0.035 | 0.000 | 0.015 | 0.020 | 0.007 | 0.016 | 0.085 | 0.055 | 0.033 | 0.202 | 0.013 | 0.048 | 0.011 | 0.049 | 0.008 | 0.011 | 0.039 | 0.016 | 4.645  | 0.033 | 0.055 | 0.026 | 0.099 | 0.006 | 0.008 |
| 028-101 | 0.081 | 1.294 | 0.032 | 0.000 | 0.008 | 0.027 | 0.016 | 0.016 | 0.055 | 0.054 | 0.048 | 0.214 | 0.008 | 0.060 | 0.012 | 0.061 | 0.008 | 0.012 | 0.039 | 0.018 | 4.834  | 0.049 | 0.047 | 0.022 | 0.101 | 0.006 | 0.007 |
| 028-102 | 0.084 | 1.198 | 0.031 | 0.000 | 0.017 | 0.025 | 0.019 | 0.009 | 0.069 | 0.054 | 0.035 | 0.198 | 0.013 | 0.056 | 0.012 | 0.048 | 0.008 | 0.018 | 0.044 | 0.017 | 4.513  | 0.050 | 0.043 | 0.024 | 0.097 | 0.007 | 0.007 |
| 028-103 | 0.090 | 1.226 | 0.029 | 0.000 | 0.000 | 0.025 | 0.016 | 0.013 | 0.076 | 0.067 | 0.042 | 0.174 | 0.015 | 0.052 | 0.011 | 0.041 | 0.021 | 0.000 | 0.044 | 0.016 | 4.865  | 0.056 | 0.048 | 0.028 | 0.107 | 0.004 | 0.008 |

|         |       |       |       |       |       |       |       |       |       |       |       |       |       |       |       |       |       |       |       |       |        |       |       |       |       |       |       |
|---------|-------|-------|-------|-------|-------|-------|-------|-------|-------|-------|-------|-------|-------|-------|-------|-------|-------|-------|-------|-------|--------|-------|-------|-------|-------|-------|-------|
| 028-104 | 0.085 | 1.415 | 0.029 | 0.000 | 0.013 | 0.028 | 0.014 | 0.011 | 0.056 | 0.039 | 0.030 | 0.192 | 0.012 | 0.047 | 0.011 | 0.052 | 0.014 | 0.017 | 0.032 | 0.018 | 3.944  | 0.042 | 0.052 | 0.032 | 0.093 | 0.008 | 0.006 |
| 028-105 | 0.092 | 1.230 | 0.034 | 0.000 | 0.013 | 0.018 | 0.015 | 0.013 | 0.062 | 0.066 | 0.036 | 0.191 | 0.008 | 0.056 | 0.012 | 0.024 | 0.014 | 0.006 | 0.043 | 0.015 | 4.362  | 0.039 | 0.043 | 0.034 | 0.098 | 0.006 | 0.006 |
| 028-106 | 0.099 | 1.240 | 0.034 | 0.001 | 0.015 | 0.023 | 0.017 | 0.015 | 0.054 | 0.082 | 0.032 | 0.179 | 0.013 | 0.078 | 0.015 | 0.040 | 0.013 | 0.015 | 0.057 | 0.015 | 4.622  | 0.044 | 0.048 | 0.020 | 0.097 | 0.005 | 0.006 |
| 028-107 | 0.092 | 1.345 | 0.030 | 0.000 | 0.016 | 0.022 | 0.019 | 0.015 | 0.043 | 0.079 | 0.036 | 0.188 | 0.013 | 0.065 | 0.016 | 0.067 | 0.012 | 0.010 | 0.030 | 0.012 | 4.070  | 0.043 | 0.042 | 0.027 | 0.091 | 0.006 | 0.008 |
| 028-108 | 0.165 | 4.355 | 0.196 | 0.000 | 0.000 | 0.091 | 0.000 | 0.067 | 0.000 | 0.000 | 0.139 | 0.559 | 0.000 | 0.000 | 0.000 | 0.211 | 0.071 | 0.000 | 0.000 | 0.088 | 13.490 | 0.000 | 0.272 | 0.080 | 0.291 | 0.000 | 0.000 |
| 028-109 | 0.090 | 1.417 | 0.034 | 0.000 | 0.000 | 0.024 | 0.011 | 0.015 | 0.084 | 0.104 | 0.036 | 0.202 | 0.019 | 0.083 | 0.010 | 0.059 | 0.015 | 0.014 | 0.062 | 0.020 | 5.136  | 0.055 | 0.051 | 0.027 | 0.110 | 0.011 | 0.008 |
| 028-110 | 0.105 | 1.330 | 0.030 | 0.000 | 0.017 | 0.023 | 0.013 | 0.013 | 0.068 | 0.102 | 0.049 | 0.209 | 0.011 | 0.050 | 0.013 | 0.056 | 0.011 | 0.016 | 0.041 | 0.015 | 4.324  | 0.068 | 0.045 | 0.024 | 0.099 | 0.005 | 0.008 |
| SRM 610 | 0.136 | 1.923 | 0.051 | 0.000 | 0.021 | 0.043 | 0.028 | 0.025 | 0.086 | 0.104 | 0.072 | 0.362 | 0.009 | 0.052 | 0.019 | 0.046 | 0.015 | 0.027 | 0.081 | 0.019 | 6.108  | 0.051 | 0.081 | 0.043 | 0.138 | 0.008 | 0.010 |
| GJ-1std | 0.086 | 1.342 | 0.029 | 0.000 | 0.014 | 0.020 | 0.016 | 0.010 | 0.102 | 0.058 | 0.038 | 0.215 | 0.016 | 0.050 | 0.011 | 0.051 | 0.018 | 0.025 | 0.057 | 0.016 | 4.487  | 0.047 | 0.084 | 0.026 | 0.107 | 0.007 | 0.009 |
| SRM 610 | 0.102 | 2.013 | 0.077 | 0.000 | 0.024 | 0.026 | 0.024 | 0.024 | 0.000 | 0.000 | 0.046 | 0.341 | 0.027 | 0.082 | 0.023 | 0.086 | 0.022 | 0.025 | 0.077 | 0.038 | 6.355  | 0.055 | 0.094 | 0.043 | 0.146 | 0.009 | 0.008 |
| GJ-1std | 0.097 | 1.325 | 0.034 | 0.000 | 0.023 | 0.019 | 0.012 | 0.011 | 0.111 | 0.079 | 0.047 | 0.198 | 0.012 | 0.040 | 0.019 | 0.056 | 0.013 | 0.015 | 0.045 | 0.018 | 4.518  | 0.053 | 0.069 | 0.027 | 0.105 | 0.009 | 0.007 |
| GJ-1std | 0.106 | 1.673 | 0.046 | 0.000 | 0.011 | 0.035 | 0.018 | 0.007 | 0.044 | 0.074 | 0.029 | 0.301 | 0.011 | 0.069 | 0.016 | 0.039 | 0.021 | 0.014 | 0.074 | 0.013 | 4.351  | 0.057 | 0.057 | 0.124 | 0.152 | 0.008 | 0.007 |
| Ple     | 0.103 | 1.418 | 0.041 | 0.000 | 0.018 | 0.031 | 0.018 | 0.020 | 0.066 | 0.112 | 0.033 | 0.229 | 0.014 | 0.055 | 0.012 | 0.044 | 0.022 | 0.008 | 0.037 | 0.012 | 5.098  | 0.053 | 0.055 | 0.035 | 0.115 | 0.006 | 0.005 |
| 91500   | 0.098 | 1.233 | 0.038 | 0.000 | 0.029 | 0.025 | 0.020 | 0.011 | 0.074 | 0.064 | 0.038 | 0.217 | 0.019 | 0.077 | 0.007 | 0.049 | 0.020 | 0.025 | 0.045 | 0.012 | 5.209  | 0.048 | 0.068 | 0.033 | 0.117 | 0.005 | 0.006 |
| 028-111 | 0.105 | 1.626 | 0.052 | 0.000 | 0.019 | 0.023 | 0.022 | 0.017 | 0.056 | 0.067 | 0.040 | 0.238 | 0.010 | 0.083 | 0.000 | 0.063 | 0.022 | 0.020 | 0.047 | 0.015 | 4.778  | 0.044 | 0.037 | 0.027 | 0.100 | 0.007 | 0.006 |
| 028-112 | 0.086 | 1.500 | 0.041 | 0.000 | 0.019 | 0.039 | 0.017 | 0.017 | 0.055 | 0.080 | 0.037 | 0.223 | 0.014 | 0.067 | 0.020 | 0.044 | 0.012 | 0.016 | 0.058 | 0.018 | 5.527  | 0.035 | 0.068 | 0.040 | 0.122 | 0.008 | 0.011 |
| 028-113 | 0.105 | 1.286 | 0.031 | 0.000 | 0.000 | 0.034 | 0.023 | 0.022 | 0.077 | 0.080 | 0.039 | 0.225 | 0.014 | 0.049 | 0.019 | 0.067 | 0.007 | 0.013 | 0.063 | 0.017 | 5.380  | 0.066 | 0.051 | 0.034 | 0.120 | 0.006 | 0.008 |
| 028-114 | 0.126 | 1.420 | 0.044 | 0.000 | 0.019 | 0.042 | 0.021 | 0.022 | 0.091 | 0.092 | 0.036 | 0.239 | 0.018 | 0.106 | 0.014 | 0.090 | 0.017 | 0.017 | 0.076 | 0.023 | 5.432  | 0.047 | 0.069 | 0.038 | 0.123 | 0.011 | 0.006 |
| 028-115 | 0.092 | 1.425 | 0.049 | 0.000 | 0.018 | 0.023 | 0.009 | 0.024 | 0.043 | 0.099 | 0.032 | 0.254 | 0.011 | 0.061 | 0.017 | 0.056 | 0.011 | 0.014 | 0.076 | 0.023 | 5.723  | 0.048 | 0.057 | 0.026 | 0.118 | 0.008 | 0.010 |
| 028-116 | 0.095 | 1.443 | 0.042 | 0.000 | 0.019 | 0.025 | 0.017 | 0.021 | 0.000 | 0.094 | 0.046 | 0.217 | 0.000 | 0.092 | 0.011 | 0.075 | 0.010 | 0.023 | 0.072 | 0.015 | 4.890  | 0.057 | 0.061 | 0.034 | 0.114 | 0.007 | 0.008 |
| 028-117 | 0.122 | 1.185 | 0.035 | 0.000 | 0.010 | 0.031 | 0.029 | 0.015 | 0.055 | 0.079 | 0.045 | 0.223 | 0.020 | 0.082 | 0.018 | 0.048 | 0.015 | 0.013 | 0.066 | 0.017 | 4.376  | 0.054 | 0.067 | 0.025 | 0.102 | 0.007 | 0.007 |
| 028-118 | 0.092 | 1.670 | 0.043 | 0.000 | 0.000 | 0.034 | 0.025 | 0.012 | 0.079 | 0.126 | 0.051 | 0.182 | 0.016 | 0.064 | 0.013 | 0.076 | 0.014 | 0.015 | 0.060 | 0.013 | 5.041  | 0.048 | 0.049 | 0.022 | 0.104 | 0.006 | 0.007 |
| 028-119 | 0.098 | 1.471 | 0.049 | 0.000 | 0.026 | 0.023 | 0.017 | 0.019 | 0.057 | 0.095 | 0.046 | 0.221 | 0.013 | 0.030 | 0.013 | 0.072 | 0.014 | 0.018 | 0.054 | 0.019 | 5.861  | 0.057 | 0.055 | 0.036 | 0.127 | 0.007 | 0.008 |
| 028-120 | 0.110 | 1.520 | 0.049 | 0.000 | 0.017 | 0.022 | 0.027 | 0.023 | 0.079 | 0.068 | 0.040 | 0.345 | 0.013 | 0.078 | 0.011 | 0.083 | 0.016 | 0.023 | 0.028 | 0.013 | 5.426  | 0.046 | 0.058 | 0.022 | 0.111 | 0.012 | 0.007 |
| SRM 610 | 0.314 | 2.341 | 0.059 | 0.000 | 0.014 | 0.035 | 0.027 | 0.019 | 0.125 | 0.119 | 0.066 | 0.330 | 0.018 | 0.133 | 0.019 | 0.084 | 0.030 | 0.022 | 0.040 | 0.033 | 7.134  | 0.078 | 0.088 | 0.040 | 0.159 | 0.008 | 0.008 |
| GJ-1std | 0.093 | 1.491 | 0.042 | 0.000 | 0.000 | 0.032 | 0.019 | 0.016 | 0.056 | 0.093 | 0.058 | 0.277 | 0.031 | 0.063 | 0.020 | 0.063 | 0.017 | 0.011 | 0.028 | 0.015 | 4.906  | 0.050 | 0.051 | 0.026 | 0.106 | 0.007 | 0.008 |
| GJ-1std | 0.094 | 1.106 | 0.033 | 0.000 | 0.025 | 0.027 | 0.012 | 0.013 | 0.092 | 0.048 | 0.027 | 0.287 | 0.014 | 0.041 | 0.017 | 0.069 | 0.010 | 0.015 | 0.063 | 0.009 | 5.291  | 0.036 | 0.077 | 0.028 | 0.114 | 0.007 | 0.010 |
| Ple     | 0.084 | 1.488 | 0.041 | 0.000 | 0.025 | 0.044 | 0.022 | 0.012 | 0.000 | 0.070 | 0.047 | 0.248 | 0.013 | 0.043 | 0.008 | 0.057 | 0.016 | 0.016 | 0.100 | 0.009 | 6.336  | 0.046 | 0.073 | 0.035 | 0.134 | 0.007 | 0.005 |
| 91500   | 0.105 | 1.673 | 0.051 | 0.000 | 0.014 | 0.026 | 0.022 | 0.012 | 0.106 | 0.084 | 0.038 | 0.266 | 0.021 | 0.079 | 0.020 | 0.056 | 0.016 | 0.024 | 0.070 | 0.021 | 5.173  | 0.046 | 0.241 | 0.039 | 0.157 | 0.007 | 0.005 |
| 028-121 | 0.154 | 1.459 | 0.066 | 0.000 | 0.022 | 0.045 | 0.047 | 0.037 | 0.000 | 0.000 | 0.043 | 0.366 | 0.023 | 0.120 | 0.023 | 0.120 | 0.026 | 0.000 | 0.084 | 0.020 | 7.487  | 0.058 | 0.084 | 0.033 | 0.155 | 0.014 | 0.000 |
| 028-122 | 0.124 | 1.498 | 0.034 | 0.000 | 0.014 | 0.016 | 0.013 | 0.010 | 0.042 | 0.050 | 0.052 | 0.248 | 0.011 | 0.052 | 0.011 | 0.051 | 0.014 | 0.011 | 0.075 | 0.020 | 4.988  | 0.050 | 0.039 | 0.161 | 0.175 | 0.010 | 0.012 |
| 028-123 | 0.112 | 1.555 | 0.045 | 0.000 | 0.014 | 0.029 | 0.033 | 0.022 | 0.123 | 0.050 | 0.054 | 0.208 | 0.021 | 0.052 | 0.015 | 0.060 | 0.007 | 0.017 | 0.040 | 0.013 | 6.062  | 0.043 | 0.060 | 0.029 | 0.124 | 0.011 | 0.009 |
| 028-124 | 0.098 | 1.329 | 0.032 | 0.000 | 0.014 | 0.026 | 0.021 | 0.016 | 0.107 | 0.050 | 0.054 | 0.254 | 0.019 | 0.059 | 0.008 | 0.066 | 0.016 | 0.011 | 0.056 | 0.022 | 4.794  | 0.066 | 0.058 | 0.025 | 0.109 | 0.007 | 0.006 |
| 028-125 | 0.070 | 1.417 | 0.059 | 0.000 | 0.018 | 0.026 | 0.028 | 0.019 | 0.083 | 0.073 | 0.044 | 0.198 | 0.014 | 0.061 | 0.014 | 0.067 | 0.020 | 0.016 | 0.042 | 0.016 | 6.647  | 0.041 | 0.067 | 0.055 | 0.147 | 0.005 | 0.008 |
| 028-126 | 0.100 | 1.527 | 0.052 | 0.000 | 0.029 | 0.030 | 0.028 | 0.016 | 0.069 | 0.049 | 0.041 | 0.209 | 0.016 | 0.064 | 0.011 | 0.079 | 0.017 | 0.014 | 0.207 | 0.013 | 4.969  | 0.057 | 0.074 | 0.035 | 0.118 | 0.010 | 0.006 |
| 028-127 | 0.096 | 1.089 | 0.043 | 0.000 | 0.014 | 0.018 | 0.025 | 0.028 | 0.120 | 0.068 | 0.044 | 0.177 | 0.015 | 0.077 | 0.015 | 0.053 | 0.010 | 0.013 | 0.054 | 0.019 | 5.010  | 0.053 | 0.053 | 0.029 | 0.110 | 0.007 | 0.006 |
| 028-128 | 0.093 | 1.401 | 0.040 | 0.000 | 0.017 | 0.024 | 0.029 | 0.016 | 0.070 | 0.129 | 0.043 | 0.322 | 0.020 | 0.071 | 0.011 | 0.057 | 0.013 | 0.011 | 0.123 | 0.016 | 5.784  | 0.044 | 0.051 | 0.033 | 0.120 | 0.008 | 0.005 |
| 028-129 | 0.111 | 1.339 | 0.038 | 0.000 | 0.014 | 0.034 | 0.018 | 0.018 | 0.129 | 0.085 | 0.036 | 0.333 | 0.021 | 0.095 | 0.025 | 0.050 | 0.013 | 0.014 | 0.095 | 0.009 | 6.389  | 0.042 | 0.057 | 0.087 | 0.158 | 0.007 | 0.007 |
| 028-130 | 0.080 | 1.359 | 0.051 | 0.000 | 0.019 | 0.026 | 0.024 | 0.015 | 0.056 | 0.104 | 0.045 | 0.247 | 0.022 | 0.068 | 0.015 | 0.036 | 0.020 | 0.019 | 0.039 | 0.000 | 5.116  | 0.052 | 0.039 | 0.028 | 0.108 | 0.007 | 0.007 |
| SRM 610 | 0.117 | 2.150 | 0.057 | 0.000 | 0.014 | 0.038 | 0.029 | 0.010 | 0.139 | 0.135 | 0.060 | 0.385 | 0.021 | 0.131 | 0.026 | 0.043 | 0.018 | 0.036 | 0.040 | 0.037 | 6.925  | 0.100 | 0.067 | 0.043 | 0.158 | 0.011 | 0.008 |
| GJ-1std | 0.084 | 1.476 | 0.039 | 0.000 | 0.010 | 0.025 | 0.000 | 0.015 | 0.069 | 0.049 | 0.035 | 0.209 | 0.017 | 0.105 | 0.011 | 0.074 | 0.017 | 0.011 | 0.060 | 0.013 | 5.550  | 0.044 | 0.052 | 0.028 | 0.114 | 0.007 | 0.011 |

|         |       |       |       |       |       |       |       |       |       |       |       |       |       |       |       |       |       |       |       |       |        |       |       |       |       |       |       |
|---------|-------|-------|-------|-------|-------|-------|-------|-------|-------|-------|-------|-------|-------|-------|-------|-------|-------|-------|-------|-------|--------|-------|-------|-------|-------|-------|-------|
| GJ-1std | 0.102 | 1.469 | 0.037 | 0.000 | 0.018 | 0.037 | 0.028 | 0.015 | 0.074 | 0.108 | 0.050 | 0.257 | 0.014 | 0.075 | 0.026 | 0.060 | 0.010 | 0.032 | 0.037 | 0.017 | 5.391  | 0.054 | 0.085 | 0.033 | 0.125 | 0.008 | 0.010 |
| Ple     | 0.099 | 1.904 | 0.038 | 0.000 | 0.000 | 0.032 | 0.009 | 0.010 | 0.060 | 0.052 | 0.044 | 0.279 | 0.018 | 0.073 | 0.023 | 0.080 | 0.015 | 0.014 | 0.076 | 0.010 | 4.536  | 0.048 | 0.065 | 0.028 | 0.104 | 0.008 | 0.009 |
| 91500   | 0.091 | 1.136 | 0.049 | 0.000 | 0.010 | 0.037 | 0.021 | 0.016 | 0.059 | 0.071 | 0.046 | 0.178 | 0.022 | 0.084 | 0.016 | 0.055 | 0.017 | 0.016 | 0.062 | 0.013 | 5.396  | 0.052 | 0.057 | 0.035 | 0.119 | 0.005 | 0.007 |
| 028-131 | 0.103 | 1.361 | 0.038 | 0.000 | 0.018 | 0.032 | 0.016 | 0.012 | 0.091 | 0.099 | 0.034 | 0.217 | 0.015 | 0.109 | 0.027 | 0.052 | 0.011 | 0.012 | 0.041 | 0.026 | 5.922  | 0.062 | 0.043 | 0.037 | 0.127 | 0.000 | 0.005 |
| 028-132 | 0.102 | 1.492 | 0.046 | 0.000 | 0.039 | 0.041 | 0.021 | 0.010 | 0.116 | 0.087 | 0.050 | 0.226 | 0.022 | 0.085 | 0.014 | 0.048 | 0.011 | 0.024 | 0.122 | 0.013 | 5.277  | 0.049 | 0.065 | 0.034 | 0.118 | 0.011 | 0.005 |
| 028-133 | 0.093 | 1.447 | 0.039 | 0.000 | 0.017 | 0.020 | 0.013 | 0.010 | 0.123 | 0.096 | 0.034 | 0.265 | 0.013 | 0.079 | 0.013 | 0.047 | 0.019 | 0.008 | 0.048 | 0.016 | 4.554  | 0.043 | 0.047 | 0.029 | 0.100 | 0.008 | 0.007 |
| 028-134 | 0.086 | 1.475 | 0.042 | 0.001 | 0.020 | 0.019 | 0.021 | 0.017 | 0.000 | 0.129 | 0.051 | 0.331 | 0.017 | 0.060 | 0.015 | 0.066 | 0.021 | 0.018 | 0.040 | 0.021 | 5.243  | 0.052 | 0.065 | 0.030 | 0.116 | 0.007 | 0.009 |
| 028-135 | 0.096 | 1.358 | 0.055 | 0.000 | 0.029 | 0.029 | 0.025 | 0.014 | 0.059 | 0.000 | 0.047 | 0.214 | 0.019 | 0.080 | 0.011 | 0.055 | 0.013 | 0.011 | 0.062 | 0.016 | 5.842  | 0.050 | 0.032 | 0.040 | 0.122 | 0.009 | 0.007 |
| 028-136 | 0.290 | 5.713 | 0.131 | 0.000 | 0.000 | 0.121 | 0.000 | 0.000 | 0.000 | 0.631 | 0.000 | 0.000 | 0.000 | 0.000 | 0.000 | 0.000 | 0.000 | 0.000 | 0.000 | 0.000 | 4.073  | 0.346 | 0.329 | 0.000 | 0.213 | 0.040 | 0.038 |
| 028-137 | 0.093 | 1.501 | 0.039 | 0.000 | 0.010 | 0.032 | 0.021 | 0.012 | 0.042 | 0.070 | 0.057 | 0.267 | 0.020 | 0.074 | 0.017 | 0.047 | 0.019 | 0.014 | 0.049 | 0.013 | 6.326  | 0.040 | 0.075 | 0.030 | 0.131 | 0.005 | 0.005 |
| 028-138 | 0.096 | 1.412 | 0.054 | 0.001 | 0.022 | 0.028 | 0.021 | 0.012 | 0.059 | 0.051 | 0.067 | 0.215 | 0.017 | 0.066 | 0.015 | 0.052 | 0.016 | 0.014 | 0.076 | 0.013 | 5.298  | 0.060 | 0.052 | 0.034 | 0.118 | 0.008 | 0.008 |
| 028-139 | 0.099 | 1.481 | 0.033 | 0.000 | 0.000 | 0.016 | 0.009 | 0.015 | 0.119 | 0.070 | 0.055 | 0.237 | 0.016 | 0.071 | 0.013 | 0.042 | 0.013 | 0.011 | 0.048 | 0.016 | 4.381  | 0.053 | 0.057 | 0.036 | 0.106 | 0.008 | 0.006 |
| 028-140 | 0.091 | 1.376 | 0.043 | 0.000 | 0.000 | 0.026 | 0.019 | 0.016 | 0.058 | 0.050 | 0.046 | 0.223 | 0.018 | 0.075 | 0.013 | 0.062 | 0.016 | 0.014 | 0.029 | 0.013 | 5.525  | 0.051 | 0.054 | 0.028 | 0.116 | 0.005 | 0.011 |
| SRM 610 | 0.140 | 1.960 | 0.063 | 0.000 | 0.021 | 0.035 | 0.035 | 0.018 | 0.159 | 0.103 | 0.050 | 0.260 | 0.025 | 0.064 | 0.023 | 0.083 | 0.027 | 0.020 | 0.042 | 0.026 | 7.342  | 0.089 | 0.087 | 0.059 | 0.174 | 0.010 | 0.014 |
| GJ-1std | 0.100 | 1.429 | 0.042 | 0.000 | 0.010 | 0.019 | 0.022 | 0.014 | 0.072 | 0.117 | 0.045 | 0.202 | 0.013 | 0.031 | 0.011 | 0.043 | 0.013 | 0.014 | 0.067 | 0.013 | 5.908  | 0.057 | 0.054 | 0.038 | 0.128 | 0.009 | 0.006 |
| GJ-1std | 0.090 | 1.581 | 0.045 | 0.000 | 0.000 | 0.030 | 0.018 | 0.021 | 0.082 | 0.130 | 0.053 | 0.215 | 0.015 | 0.084 | 0.026 | 0.055 | 0.015 | 0.020 | 0.075 | 0.032 | 4.752  | 0.053 | 0.071 | 0.062 | 0.127 | 0.009 | 0.006 |
| Ple     | 0.088 | 1.517 | 0.040 | 0.000 | 0.014 | 0.025 | 0.037 | 0.016 | 0.097 | 0.085 | 0.038 | 0.279 | 0.015 | 0.083 | 0.008 | 0.060 | 0.020 | 0.017 | 0.029 | 0.018 | 6.059  | 0.034 | 0.057 | 0.029 | 0.121 | 0.007 | 0.007 |
| 91500   | 0.096 | 1.421 | 0.043 | 0.000 | 0.000 | 0.034 | 0.020 | 0.018 | 0.082 | 0.071 | 0.040 | 0.283 | 0.017 | 0.067 | 0.016 | 0.069 | 0.022 | 0.014 | 0.065 | 0.009 | 5.805  | 0.054 | 0.050 | 0.031 | 0.121 | 0.006 | 0.007 |
| 028-141 | 0.086 | 1.275 | 0.061 | 0.000 | 0.000 | 0.029 | 0.027 | 0.021 | 0.081 | 0.107 | 0.057 | 0.214 | 0.011 | 0.059 | 0.018 | 0.042 | 0.016 | 0.008 | 0.040 | 0.018 | 6.193  | 0.055 | 0.070 | 0.026 | 0.129 | 0.009 | 0.010 |
| 028-142 | 0.100 | 1.128 | 0.043 | 0.000 | 0.014 | 0.026 | 0.036 | 0.019 | 0.124 | 0.085 | 0.049 | 0.215 | 0.015 | 0.095 | 0.013 | 0.057 | 0.007 | 0.008 | 0.121 | 0.016 | 4.387  | 0.058 | 0.063 | 0.040 | 0.110 | 0.005 | 0.009 |
| 028-143 | 0.188 | 2.250 | 0.056 | 0.000 | 0.041 | 0.039 | 0.000 | 0.038 | 0.000 | 0.000 | 0.079 | 0.439 | 0.042 | 0.000 | 0.000 | 0.089 | 0.030 | 0.033 | 0.116 | 0.000 | 12.083 | 0.119 | 0.243 | 0.053 | 0.279 | 0.000 | 0.012 |
| 028-144 | 0.103 | 1.329 | 0.048 | 0.000 | 0.014 | 0.024 | 0.025 | 0.018 | 0.058 | 0.050 | 0.034 | 0.224 | 0.022 | 0.065 | 0.000 | 0.042 | 0.010 | 0.014 | 0.061 | 0.020 | 5.828  | 0.064 | 0.052 | 0.024 | 0.121 | 0.009 | 0.006 |
| 028-145 | 0.084 | 1.286 | 0.045 | 0.000 | 0.020 | 0.028 | 0.022 | 0.007 | 0.083 | 0.099 | 0.056 | 0.198 | 0.011 | 0.031 | 0.015 | 0.022 | 0.013 | 0.016 | 0.041 | 0.027 | 5.367  | 0.051 | 0.038 | 0.033 | 0.113 | 0.007 | 0.008 |
| 028-146 | 0.092 | 1.456 | 0.035 | 0.000 | 0.018 | 0.033 | 0.015 | 0.012 | 0.072 | 0.098 | 0.051 | 0.280 | 0.018 | 0.060 | 0.011 | 0.055 | 0.016 | 0.016 | 0.040 | 0.028 | 5.143  | 0.065 | 0.045 | 0.031 | 0.114 | 0.005 | 0.004 |
| 028-147 | 0.081 | 1.521 | 0.035 | 0.000 | 0.025 | 0.035 | 0.025 | 0.019 | 0.082 | 0.099 | 0.048 | 0.229 | 0.017 | 0.085 | 0.017 | 0.064 | 0.017 | 0.020 | 0.041 | 0.013 | 5.928  | 0.046 | 0.055 | 0.038 | 0.126 | 0.008 | 0.008 |
| 028-148 | 0.091 | 1.641 | 0.049 | 0.000 | 0.018 | 0.025 | 0.026 | 0.015 | 0.091 | 0.131 | 0.037 | 0.262 | 0.008 | 0.066 | 0.018 | 0.052 | 0.008 | 0.008 | 0.041 | 0.023 | 5.819  | 0.038 | 0.050 | 0.031 | 0.118 | 0.011 | 0.007 |
| 028-149 | 0.100 | 1.221 | 0.052 | 0.000 | 0.018 | 0.019 | 0.028 | 0.015 | 0.060 | 0.072 | 0.045 | 0.252 | 0.013 | 0.067 | 0.028 | 0.043 | 0.011 | 0.019 | 0.041 | 0.013 | 4.899  | 0.041 | 0.058 | 0.035 | 0.110 | 0.010 | 0.004 |
| 028-150 | 0.103 | 1.518 | 0.043 | 0.000 | 0.015 | 0.034 | 0.021 | 0.024 | 0.083 | 0.051 | 0.052 | 0.253 | 0.017 | 0.085 | 0.008 | 0.067 | 0.013 | 0.012 | 0.084 | 0.000 | 4.721  | 0.041 | 0.050 | 0.031 | 0.103 | 0.005 | 0.005 |
| 028-151 | 0.092 | 1.624 | 0.041 | 0.001 | 0.000 | 0.024 | 0.032 | 0.017 | 0.083 | 0.087 | 0.044 | 0.190 | 0.022 | 0.053 | 0.008 | 0.074 | 0.017 | 0.032 | 0.057 | 0.018 | 6.268  | 0.045 | 0.040 | 0.035 | 0.126 | 0.010 | 0.008 |
| 028-152 | 0.104 | 1.677 | 0.061 | 0.002 | 0.000 | 0.040 | 0.035 | 0.024 | 0.084 | 0.073 | 0.039 | 0.315 | 0.015 | 0.044 | 0.022 | 0.088 | 0.013 | 0.020 | 0.063 | 0.024 | 5.267  | 0.053 | 0.064 | 0.028 | 0.115 | 0.012 | 0.004 |
| 91500   | 0.109 | 1.585 | 0.033 | 0.000 | 0.030 | 0.031 | 0.013 | 0.012 | 0.085 | 0.117 | 0.047 | 0.261 | 0.015 | 0.000 | 0.011 | 0.065 | 0.010 | 0.012 | 0.062 | 0.016 | 4.635  | 0.047 | 0.029 | 0.032 | 0.100 | 0.004 | 0.006 |
| Ple     | 0.071 | 1.077 | 0.036 | 0.000 | 0.018 | 0.028 | 0.024 | 0.019 | 0.072 | 0.071 | 0.046 | 0.180 | 0.011 | 0.098 | 0.017 | 0.047 | 0.020 | 0.022 | 0.064 | 0.024 | 5.187  | 0.049 | 0.044 | 0.039 | 0.115 | 0.005 | 0.007 |
| GJ-1std | 0.103 | 1.427 | 0.035 | 0.000 | 0.020 | 0.026 | 0.013 | 0.010 | 0.081 | 0.070 | 0.038 | 0.277 | 0.015 | 0.068 | 0.015 | 0.060 | 0.013 | 0.021 | 0.074 | 0.000 | 5.216  | 0.039 | 0.051 | 0.027 | 0.108 | 0.006 | 0.006 |
| GJ-1std | 0.092 | 1.361 | 0.050 | 0.001 | 0.014 | 0.024 | 0.021 | 0.025 | 0.042 | 0.096 | 0.048 | 0.256 | 0.015 | 0.075 | 0.015 | 0.056 | 0.020 | 0.011 | 0.073 | 0.020 | 4.651  | 0.059 | 0.054 | 0.031 | 0.107 | 0.007 | 0.008 |
| SRM 610 | 0.128 | 2.431 | 0.057 | 0.000 | 0.041 | 0.042 | 0.033 | 0.027 | 0.104 | 0.125 | 0.070 | 0.378 | 0.019 | 0.086 | 0.027 | 0.091 | 0.018 | 0.026 | 0.166 | 0.019 | 7.181  | 0.079 | 0.085 | 0.045 | 0.162 | 0.009 | 0.010 |

Table S2 Detrial zircon LA-ICP-MS U–Pb dating analytical data in the lower part of the Zhiluo Formation sandstone (Sample YS-01)

| Contents | Pb(ppm) | Th(ppm) | U(ppm) | 207Pb/206Pb | 207Pb/206Pb | 207Pb/235U  | 207Pb/235U  | 206Pb/238U | 206Pb/238U  |             | 208Pb/232Th | 208Pb/232Th | 238U/232Th | 207Pb/206Pb | 207Pb/206Pb | 207Pb/235U  | 207Pb/235U  | 206Pb/238U  | 206Pb/238U  | 208Pb/232Th | 208Pb/232Th |
|----------|---------|---------|--------|-------------|-------------|-------------|-------------|------------|-------------|-------------|-------------|-------------|------------|-------------|-------------|-------------|-------------|-------------|-------------|-------------|-------------|
| (ESIS)   | Total   | 232     | 238    | Ratio       | 1sigma      | Ratio       | 1sigma      | Ratio      | 1sigma      | rho         | Ratio       | 1sigma      | Ratio      | Age (Ma)    | 1sigma      |
| SRM 610  | 426     | 457.2   | 461.5  | 0.911967879 | 0.025248955 | 27.45561619 | 0.745751327 | 0.21787547 | 0.002507403 | 0.423694717 | 0.400396926 | 0.034601202 | 0.62393205 | error       | error       | 3399.853325 | 26.61677359 | 1270.639311 | 13.27211581 | 6806.583426 | 499.508214  |

|         |             |             |             |             |             |             |             |             |             |             |             |             |             |          |         |             |             |             |             |             |             |
|---------|-------------|-------------|-------------|-------------|-------------|-------------|-------------|-------------|-------------|-------------|-------------|-------------|-------------|----------|---------|-------------|-------------|-------------|-------------|-------------|-------------|
| GJ-Istd | 40.29777783 | 6.405794307 | 385.3874214 | 0.059350083 | 0.001178298 | 0.798346863 | 0.01593816  | 0.097550355 | 0.000857006 | 0.440056265 | 0.030947774 | 0.002028389 | 37.34025703 | 588.915  | 16.6625 | 595.8956526 | 8.999243773 | 600.037046  | 5.033585802 | 616.0393726 | 39.76758722 |
| GJ-Istd | 40.22223047 | 6.424072912 | 385.7191782 | 0.060929917 | 0.001365941 | 0.820253137 | 0.017786713 | 0.097649645 | 0.000803094 | 0.379269714 | 0.029252226 | 0.001994968 | 37.11594297 | 635.2    | 48.14   | 608.1896509 | 9.922192469 | 600.6201913 | 4.716514507 | 582.7699753 | 39.17678739 |
| Ple     | 22.11158339 | 30.63294379 | 385.7952103 | 0.054045235 | 0.001323746 | 0.394052551 | 0.009281039 | 0.053048722 | 0.000483657 | 0.387097399 | 0.015195128 | 0.000744845 | 7.755047482 | 372.275  | 55.55   | 337.325491  | 6.760110034 | 333.21194   | 2.960788552 | 304.8173417 | 14.82964849 |
| 91500   | 14.85605039 | 24.28972234 | 71.65922334 | 0.076364143 | 0.002003545 | 1.842550154 | 0.048394392 | 0.175154483 | 0.001743536 | 0.378995453 | 0.047266502 | 0.001858431 | 1.821734111 | 1105.555 | 57.56   | 1060.772291 | 17.28855841 | 1040.448757 | 9.564329782 | 933.4701995 | 35.86772956 |
| 028-1   | 153.5949094 | 235.8231342 | 731.4196596 | 0.117482422 | 0.001486568 | 2.823921678 | 0.057897691 | 0.172891525 | 0.002301692 | 0.649329293 | 0.051988418 | 0.001808118 | 1.941446884 | 1918.21  | 23.615  | 1361.909441 | 15.37500831 | 1028.023136 | 12.65051525 | 1024.398283 | 34.74005736 |
| 028-2   | 17.18119914 | 438.7148289 | 268.352524  | 0.052004218 | 0.001511327 | 0.291291616 | 0.008464966 | 0.040776823 | 0.000424444 | 0.358186828 | 0.011226727 | 0.000363581 | 0.395661213 | 287.1    | 66.6575 | 259.5755399 | 6.656363107 | 257.6462804 | 2.628940947 | 225.6528524 | 7.267198019 |
| 028-3   | 15.20965339 | 176.8436397 | 363.3839286 | 0.050165302 | 0.001451736 | 0.239848828 | 0.007027837 | 0.034691546 | 0.000334904 | 0.329467831 | 0.010091101 | 0.000337729 | 1.266432088 | 211.185  | 66.6575 | 218.2966536 | 5.755559248 | 219.8443757 | 2.0865466   | 202.9414029 | 6.758060097 |
| 028-4   | 26.24458558 | 543.2287913 | 555.4526617 | 0.051091116 | 0.001295301 | 0.24075977  | 0.005876242 | 0.034279215 | 0.000288506 | 0.344832105 | 0.009525924 | 0.000285898 | 0.635115686 | 255.62   | 57.395  | 219.0424017 | 4.808893488 | 217.2749322 | 1.798186653 | 191.6288804 | 5.724117879 |
| 028-5   | 11.98002405 | 145.1517043 | 40.89065926 | 0.074345091 | 0.005008029 | 1.351993212 | 0.100070729 | 0.131966686 | 0.001766147 | 0.180813117 | 0.035866501 | 0.0011244   | 0.172148589 | 1050.005 | 135.955 | 868.4197026 | 43.22780428 | 799.075263  | 10.05800173 | 712.2440722 | 21.93973825 |
| 028-6   | 76.70324946 | 1014.974623 | 775.7243821 | 0.057367345 | 0.000860754 | 0.548667637 | 0.008962449 | 0.069325327 | 0.000548949 | 0.484755224 | 0.017042749 | 0.000502882 | 0.475897136 | 505.595  | 33.33   | 444.1234424 | 5.876290329 | 432.0896939 | 3.309330772 | 341.5694883 | 9.994034976 |
| 028-7   | 76.77135153 | 129.748013  | 204.0452832 | 0.106552165 | 0.001228825 | 4.292655163 | 0.055173112 | 0.292123767 | 0.002277481 | 0.606577565 | 0.075306392 | 0.00230439  | 0.973738331 | 1742.59  | 20.8325 | 1691.953131 | 10.58521105 | 1652.133411 | 11.36237846 | 1467.521712 | 43.31503516 |
| 028-8   | 13.57135677 | 118.783599  | 150.3241041 | 0.056440492 | 0.001596373 | 0.534826016 | 0.015597883 | 0.068981126 | 0.000699534 | 0.347716804 | 0.019415957 | 0.000662636 | 0.781155105 | 477.82   | 62.9575 | 435.0073918 | 10.31932675 | 430.0143528 | 4.218492867 | 388.6785694 | 13.13825894 |
| 028-9   | 297.9775663 | 572.8289086 | 1470.792088 | 0.0815813   | 0.000951787 | 1.899025732 | 0.031642121 | 0.168130189 | 0.001684991 | 0.601474374 | 0.050904606 | 0.001802983 | 1.590071725 | 1235.18  | 22.6825 | 1080.748059 | 11.08308515 | 1001.800752 | 9.298755372 | 1003.563874 | 34.67711359 |
| 028-10  | 145.2795532 | 186.2549221 | 365.358658  | 0.129776081 | 0.001327596 | 5.564505069 | 0.072648239 | 0.310974271 | 0.002859396 | 0.704289631 | 0.0800324   | 0.002816894 | 1.217569797 | 2094.755 | 17.9025 | 1910.623055 | 11.23752689 | 1745.499299 | 14.06044371 | 1556.16049  | 52.71679036 |
| SRM 610 | 426         | 457.2       | 461.5       | 0.891820179 | 0.00888274  | 27.22511878 | 0.2946981   | 0.221476799 | 0.001371802 | 0.572210277 | 0.43360947  | 0.016017319 | 0.634431979 | error    | error   | 3391.594982 | 10.6019866  | 1289.673602 | 7.239767353 | 7280.351067 | 225.8349915 |
| GJ-Istd | 39.60051263 | 6.429215344 | 382.3109569 | 0.061291443 | 0.001017404 | 0.82033078  | 0.01579819  | 0.096991943 | 0.000904857 | 0.484424231 | 0.02936487  | 0.002101011 | 37.50202375 | 650.015  | 35.1825 | 608.2329611 | 8.812473519 | 596.7564012 | 5.317343298 | 584.9819368 | 41.25473604 |
| GJ-Istd | 40.0503817  | 6.542927951 | 382.8932106 | 0.058988557 | 0.001006332 | 0.79826922  | 0.014916498 | 0.098208057 | 0.000869969 | 0.474066254 | 0.03083513  | 0.001996207 | 36.95417625 | 564.85   | 41.6575 | 595.851813  | 8.422713815 | 603.8988709 | 5.106664547 | 613.8308075 | 39.14092802 |
| Ple     | 22.82572587 | 31.71267021 | 394.7211774 | 0.05382762  | 0.00127469  | 0.39546588  | 0.009813115 | 0.053344064 | 0.000489547 | 0.369837404 | 0.016141035 | 0.00084264  | 7.808384067 | 364.87   | 53.6975 | 338.3543926 | 7.140435923 | 335.0196697 | 2.996006668 | 323.6413056 | 16.76109995 |
| 91500   | 15.38688285 | 24.7939704  | 72.49950775 | 0.073391021 | 0.001634887 | 1.808026352 | 0.040056319 | 0.179672684 | 0.001763381 | 0.442994005 | 0.049647378 | 0.002105274 | 1.837103177 | 1033.335 | 72.2225 | 1048.364594 | 14.48535783 | 1065.186229 | 9.636141991 | 979.3689216 | 40.53963958 |
| 028-11  | 118.7120025 | 12.19446411 | 334.1064925 | 0.117056047 | 0.001304513 | 5.050176034 | 0.063732109 | 0.312972592 | 0.002226105 | 0.563621406 | 0.09210506  | 0.00386468  | 17.29734667 | 1922.225 | 20.0675 | 1827.778208 | 10.69636605 | 1755.318104 | 10.9297071  | 1780.840448 | 71.52619415 |
| 028-12  | 45.11635335 | 323.8680693 | 509.7550571 | 0.055211454 | 0.000972664 | 0.531677595 | 0.010597886 | 0.069765603 | 0.000628958 | 0.452281805 | 0.019735975 | 0.000634597 | 0.984270403 | 420.42   | 36.1075 | 432.922376  | 7.025685972 | 434.743346  | 3.790102768 | 395.0226598 | 12.57836898 |
| 028-13  | 159.4257806 | 166.447883  | 312.1133182 | 0.14158824  | 0.001373697 | 7.609958425 | 0.094568892 | 0.390090503 | 0.003681439 | 0.759427386 | 0.105320955 | 0.003190496 | 1.21399377  | 2246.61  | 16.6675 | 2186.037965 | 11.15307501 | 2123.248061 | 17.07236918 | 2023.96664  | 58.34252546 |
| 028-14  | 196.1632532 | 151.8339678 | 388.3917695 | 0.144438947 | 0.001248429 | 7.922156739 | 0.090546945 | 0.397465103 | 0.003130321 | 0.689063946 | 0.106881245 | 0.003105608 | 1.587483441 | 2281.17  | 14.815  | 2222.204096 | 10.30501852 | 2157.356677 | 14.43998906 | 2052.478463 | 56.71017669 |
| 028-15  | 224.7353051 | 336.7778678 | 685.1251287 | 0.132309519 | 0.001179959 | 4.677107694 | 0.065956841 | 0.25619501  | 0.002905934 | 0.804327004 | 0.06988087  | 0.002038033 | 1.268918651 | 2128.7   | 15.43   | 1763.153672 | 11.7972875  | 1470.345327 | 14.91240557 | 1365.281567 | 38.50264625 |
| 028-16  | 164.2156147 | 161.892341  | 408.5176752 | 0.140969794 | 0.001409356 | 6.315655187 | 0.123730307 | 0.323822924 | 0.005104572 | 0.804626035 | 0.095455273 | 0.003003007 | 1.571638115 | 2239.2   | 17.75   | 2020.629129 | 17.17489896 | 1808.371991 | 24.85706294 | 1842.749897 | 55.40857562 |
| 028-17  | 48.65353669 | 387.4252999 | 1278.119249 | 0.049968979 | 0.000912045 | 0.228833822 | 0.004446329 | 0.033256772 | 0.000312802 | 0.484069949 | 0.010233538 | 0.000328532 | 2.072427975 | 194.525  | 42.5825 | 209.2355253 | 3.674009196 | 210.8991353 | 1.951549396 | 205.7914146 | 6.573096683 |
| 028-18  | 17.10845854 | 128.4714808 | 197.142428  | 0.058870549 | 0.001568606 | 0.545111545 | 0.015282318 | 0.067134647 | 0.000662744 | 0.352123431 | 0.020591693 | 0.00068182  | 0.952060225 | 561.145  | 59.25   | 441.7892114 | 10.04323127 | 418.8696641 | 4.003543245 | 411.9767619 | 13.50305793 |
| 028-19  | 101.5525638 | 868.7114219 | 1442.747555 | 0.191345149 | 0.007424969 | 0.993710597 | 0.037062858 | 0.037854092 | 0.000203208 | 0.143929103 | 0.0298792   | 0.001372454 | 1.026917157 | 2754.02  | 63.8875 | 700.6117929 | 18.87803299 | 239.5178628 | 1.262183077 | 595.0785983 | 26.93555174 |
| 028-20  | 27.04790552 | 244.9221622 | 673.4485892 | 0.075996699 | 0.002777382 | 0.328047851 | 0.01261676  | 0.031250333 | 0.000307672 | 0.255989794 | 0.013738716 | 0.000651256 | 1.724426772 | 1094.445 | 72.995  | 288.0744102 | 9.646663031 | 198.3689353 | 1.923278018 | 275.7998087 | 12.98494616 |
| SRM 610 | 426         | 457.2       | 461.5       | 0.902349441 | 0.010021742 | 26.73127585 | 0.297562032 | 0.214625097 | 0.001189812 | 0.498012348 | 0.4462489   | 0.01577053  | 0.631744144 | error    | error   | 3373.671999 | 10.8956776  | 1253.411551 | 6.314726379 | 7457.771377 | 220.4117034 |
| GJ-Istd | 40.83267947 | 6.457070205 | 376.105653  | 0.060513734 | 0.001118456 | 0.813208734 | 0.014906289 | 0.097554662 | 0.000765406 | 0.428031903 | 0.030891692 | 0.001980744 | 37.02729627 | 620.39   | 38.8825 | 604.2524823 | 8.347595887 | 600.0623435 | 4.495559779 | 614.9398381 | 38.83559541 |
| GJ-Istd | 41.27784065 | 6.475080211 | 377.3159428 | 0.059766266 | 0.001201643 | 0.805391266 | 0.016906782 | 0.097645338 | 0.000795627 | 0.388154124 | 0.029308308 | 0.001962952 | 37.42890373 | 594.47   | 44.435  | 599.8652952 | 9.508942781 | 600.594896  | 4.672679666 | 583.8712611 | 38.5459715  |
| Ple     | 23.42996243 | 31.43119833 | 383.709943  | 0.055119506 | 0.001252675 | 0.409091934 | 0.009596548 | 0.053811584 | 0.000455419 | 0.360779123 | 0.015411965 | 0.000731605 | 7.698140869 | 416.715  | 56.475  | 348.2210273 | 6.91532067  | 337.8802318 | 2.785906559 | 309.1340556 | 14.56292519 |
| 91500   | 16.06230599 | 25.48169942 | 70.71096006 | 0.07626688  | 0.001954626 | 1.910050921 | 0.049692399 | 0.181993498 | 0.00169304  | 0.357574364 | 0.052309297 | 0.002020313 | 1.7440166   | 1101.85  | 51.8525 | 1084.602305 | 17.34049537 | 1077.85604  | 9.233591909 | 1030.562496 | 38.80521223 |
| 028-21  | 14.6149733  | 110.5194456 | 154.1973392 | 0.05792381  | 0.001664639 | 0.566014014 | 0.016830783 | 0.07073161  | 0.000650524 | 0.309294925 | 0.019969271 | 0.000656063 | 0.872081341 | 527.815  | 62.955  | 455.433362  | 10.91328058 | 440.5618863 | 3.916526966 | 399.6462886 | 13.00086906 |
| 028-22  | 20.80218832 | 281.6398331 | 449.7374565 | 0.051769737 | 0.001380975 | 0.249086361 | 0.006532268 | 0.034993631 | 0.000298628 | 0.325407021 | 0.010754228 | 0.000337072 | 0.984731814 | 275.99   | 65.7325 | 225.8337542 | 5.310132987 | 221.726178  | 1.859989606 | 216.2064238 | 6.740497102 |
| 028-23  | 12.61448431 | 20.70278323 | 29.7251434  | 0.115876849 | 0.002837718 | 4.772294788 | 0.113308477 | 0.301320974 | 0.003575656 | 0.499794192 | 0.093147298 | 0.003221245 | 0.90291137  | 1        |         |             |             |             |             |             |             |

|         |             |             |             |             |             |             |             |             |             |             |             |             |             |          |         |             |             |             |             |             |             |
|---------|-------------|-------------|-------------|-------------|-------------|-------------|-------------|-------------|-------------|-------------|-------------|-------------|-------------|----------|---------|-------------|-------------|-------------|-------------|-------------|-------------|
| GJ-Istd | 41.50161258 | 6.230400559 | 378.7026733 | 0.059842909 | 0.001246637 | 0.804942516 | 0.016735158 | 0.097624804 | 0.000859412 | 0.423424611 | 0.029476752 | 0.001956732 | 37.16144101 | 598.17   | 44.435  | 599.6128795 | 9.41474998  | 600.4743022 | 5.047375287 | 587.1786901 | 38.41754475 |
| Ple     | 33.59998859 | 48.0079378  | 544.5792936 | 0.054656758 | 0.001694433 | 0.404628357 | 0.012903151 | 0.053619715 | 0.000749129 | 0.438119696 | 0.014859772 | 0.001357888 | 6.917137982 | 398.2    | 68.5125 | 344.9994953 | 9.327740654 | 336.7064217 | 4.583435495 | 298.1394035 | 27.04409162 |
| 91500   | 16.61149768 | 25.45948971 | 73.09447342 | 0.07672255  | 0.003770802 | 1.90559824  | 0.096423565 | 0.179828631 | 0.003787048 | 0.416188567 | 0.047911337 | 0.006793844 | 1.757544813 | 1113.885 | 98.15   | 1083.047473 | 33.70831414 | 1066.038356 | 20.6919581  | 945.9116759 | 131.0422343 |
| SRM 610 | 426         | 457.2       | 461.5       | 0.925786213 | 0.02003847  | 28.15564044 | 0.656551033 | 0.220630765 | 0.002331898 | 0.453252633 | 0.452399103 | 0.04203376  | 0.622478441 | error    | error   | 3424.530021 | 22.86910877 | 1285.207062 | 12.31526912 | 7543.542046 | 585.123793  |
| GJ-Istd | 38.09939233 | 6.22185817  | 367.3019128 | 0.060555537 | 0.000991813 | 0.811451849 | 0.014680317 | 0.097158745 | 0.00078951  | 0.449162132 | 0.028806647 | 0.002051539 | 36.85915409 | 633.35   | 35.1775 | 603.2681627 | 8.229018826 | 597.7365268 | 4.638809284 | 574.0178936 | 40.30516473 |
| GJ-Istd | 38.70856007 | 6.134975219 | 368.4869311 | 0.059724463 | 0.000991257 | 0.807148151 | 0.014229993 | 0.098041255 | 0.000720004 | 0.416557386 | 0.031393353 | 0.002273973 | 37.59704591 | 594.47   | 30.5475 | 600.8529175 | 7.995577122 | 602.9196818 | 4.227024296 | 624.7732814 | 44.56315338 |
| Ple     | 37.75962153 | 59.95083055 | 642.9526138 | 0.052504249 | 0.000880401 | 0.38890269  | 0.006462235 | 0.053884255 | 0.000453476 | 0.506466659 | 0.016108634 | 0.000736018 | 6.662057247 | 305.615  | 6.48    | 333.5675525 | 4.724370672 | 338.3247634 | 2.773830056 | 322.9968053 | 14.64073402 |
| 91500   | 14.46547858 | 24.32076255 | 70.26611226 | 0.079702506 | 0.001981045 | 1.876025852 | 0.047477414 | 0.171179613 | 0.001776411 | 0.410056073 | 0.050866728 | 0.002364386 | 1.793660099 | 1190.74  | 49.5325 | 1072.660231 | 16.76345911 | 1018.607299 | 9.777741771 | 1002.835357 | 45.4763649  |
| 028-26  | 12.92915568 | 215.0471618 | 289.1481025 | 0.04808187  | 0.001452291 | 0.225701105 | 0.007061228 | 0.034107796 | 0.000312813 | 0.293146522 | 0.010058548 | 0.000384858 | 0.833455299 | 101.94   | 70.3625 | 206.6436625 | 5.849656911 | 216.2064284 | 1.950012444 | 202.2899941 | 7.701371212 |
| 028-27  | 78.40105406 | 101.8525616 | 207.7127689 | 0.108992815 | 0.001209402 | 4.56144239  | 0.058692946 | 0.303644662 | 0.002478036 | 0.634246863 | 0.078301591 | 0.002686417 | 1.235094089 | 1783.335 | 20.37   | 1742.252624 | 10.716291   | 1709.356506 | 12.25369844 | 1523.743347 | 50.35565043 |
| 028-28  | 35.49958797 | 444.4768441 | 781.4891338 | 0.086327302 | 0.001503024 | 0.426906457 | 0.008470543 | 0.035838052 | 0.000346837 | 0.487755962 | 0.010549595 | 0.000371677 | 1.069733949 | 1346.29  | 33.335  | 360.977595  | 6.027688216 | 226.9834713 | 2.15849918  | 212.1139148 | 7.433995441 |
| 028-29  | 172.5119744 | 184.5099228 | 516.467803  | 0.130752554 | 0.001086728 | 4.832631095 | 0.06466987  | 0.26753505  | 0.002690654 | 0.751551602 | 0.066702462 | 0.002103769 | 1.736111433 | 2109.26  | 14.8125 | 1790.595727 | 11.25862061 | 1528.2779   | 13.68411497 | 1305.145599 | 39.86295565 |
| 028-30  | 23.53718344 | 125.5787238 | 106.8823515 | 0.069244812 | 0.001506516 | 1.455157604 | 0.033203392 | 0.15267104  | 0.001488946 | 0.427414964 | 0.039924432 | 0.001237932 | 0.535717326 | 905.555  | 44.445  | 912.0078755 | 13.73281194 | 915.918729  | 8.32706353  | 791.269316  | 24.06076862 |
| 028-31  | 21.57596882 | 176.3209614 | 232.5628118 | 0.058390941 | 0.001452855 | 0.560607591 | 0.01392421  | 0.069762923 | 0.000531201 | 0.306564774 | 0.018617189 | 0.000565729 | 0.826494782 | 542.63   | 49.065  | 451.921843  | 9.059792886 | 434.7271971 | 3.201025931 | 372.8349684 | 11.2256611  |
| 028-32  | 126.2447043 | 227.7984439 | 315.5268046 | 0.109106457 | 0.001081367 | 4.475618636 | 0.049165757 | 0.297284089 | 0.001866164 | 0.571437079 | 0.071248636 | 0.002077608 | 0.856757593 | 1784.26  | 18.2125 | 1726.461149 | 9.117402424 | 1677.827024 | 9.273275408 | 1391.104955 | 39.20017392 |
| 028-33  | 91.39349538 | 883.4025759 | 1068.83102  | 0.060881361 | 0.000755042 | 0.561327157 | 0.007986894 | 0.066880819 | 0.000606868 | 0.637721218 | 0.013727453 | 0.00042379  | 0.77219619  | 635.2    | 25.9225 | 452.3899081 | 5.194188451 | 417.3361425 | 3.666879682 | 275.5752367 | 8.449750555 |
| 028-34  | 18.43969471 | 38.37989974 | 45.7444702  | 0.117718469 | 0.003416164 | 4.356259054 | 0.133719057 | 0.26833507  | 0.002458696 | 0.298502421 | 0.079563308 | 0.002969709 | 0.747847167 | 1921.91  | 52.16   | 1704.082646 | 25.35431564 | 1532.345349 | 12.4965362  | 1547.379794 | 55.60081319 |
| 028-35  | 59.24300207 | 491.9488544 | 622.0829872 | 0.055874266 | 0.000946039 | 0.556458126 | 0.010689437 | 0.072162023 | 0.000711792 | 0.513478388 | 0.017664916 | 0.000598585 | 0.782296469 | 455.6    | 37.0325 | 449.218468  | 6.973553102 | 449.1680407 | 4.279677518 | 353.9303718 | 11.88872759 |
| SRM 610 | 426         | 457.2       | 461.5       | 0.917515804 | 0.00902005  | 27.3524123  | 0.269671343 | 0.216044938 | 0.001205117 | 0.565777642 | 0.353457464 | 0.012269453 | 0.62645869  | error    | error   | 3396.164001 | 9.658013094 | 1260.942716 | 6.388483307 | 6117.481616 | 183.2342559 |
| GJ-Istd | 40.00585082 | 6.392682158 | 380.323747  | 0.059900203 | 0.001001864 | 0.807610753 | 0.014149872 | 0.097736829 | 0.000793218 | 0.463216366 | 0.024423371 | 0.001588271 | 37.19646531 | 599.71   | 35.175  | 601.1128061 | 7.94852169  | 601.1321972 | 4.658140574 | 487.7188422 | 31.3371715  |
| GJ-Istd | 40.84076221 | 6.558271451 | 390.7565182 | 0.060379797 | 0.001013072 | 0.810989247 | 0.013757975 | 0.097463171 | 0.00076162  | 0.460636486 | 0.035776629 | 0.002308415 | 37.25973469 | 616.685  | 32.4025 | 603.0088252 | 7.713951433 | 599.5249531 | 4.473697375 | 710.4903733 | 45.04667884 |
| Ple     | 39.46268873 | 61.70627203 | 667.136132  | 0.054286526 | 0.000939891 | 0.408143237 | 0.007252343 | 0.054544784 | 0.00044559  | 0.459744236 | 0.013446745 | 0.000566144 | 6.719711549 | 383.385  | 38.885  | 347.5371718 | 5.229561316 | 342.36383   | 2.723883055 | 269.9775701 | 11.29120114 |
| 91500   | 16.03530289 | 26.67890469 | 74.87557452 | 0.073032046 | 0.001777165 | 1.824854539 | 0.042755081 | 0.181690908 | 0.001787604 | 0.419931764 | 0.041293407 | 0.001549744 | 1.751758322 | 1016.665 | 50.005  | 1054.43151  | 15.36932221 | 1076.20555  | 9.751828188 | 817.8595401 | 30.08163685 |
| 028-36  | 19.36676512 | 230.2419759 | 458.9958744 | 0.052645763 | 0.001309348 | 0.253604336 | 0.006351753 | 0.034964545 | 0.000269412 | 0.307646281 | 0.009129406 | 0.000291316 | 1.275377424 | 322.28   | 55.55   | 229.4997931 | 5.144779261 | 221.5450122 | 1.678066709 | 183.6884231 | 5.834885159 |
| 028-37  | 23.41358582 | 161.4598488 | 270.0436299 | 0.061212885 | 0.00147928  | 0.585210226 | 0.013885011 | 0.069608421 | 0.000606959 | 0.367504972 | 0.018025991 | 0.000515171 | 1.049416095 | 655.57   | 51.845  | 467.8042678 | 8.894066371 | 433.7961011 | 3.658076217 | 361.1005485 | 10.22838576 |
| 028-38  | 92.98857079 | 914.3163667 | 1020.901552 | 0.056106063 | 0.000753606 | 0.544340291 | 0.009358173 | 0.070216091 | 0.000685163 | 0.567592296 | 0.018505823 | 0.000469183 | 0.702790689 | 457.45   | 29.6275 | 441.282249  | 6.152948801 | 437.4574194 | 4.127057542 | 370.6250432 | 9.310926434 |
| 028-39  | 15.73778602 | 120.9988957 | 183.3314632 | 0.05536738  | 0.001716792 | 0.524715009 | 0.015684404 | 0.069102802 | 0.00058934  | 0.285315548 | 0.018707372 | 0.00048372  | 0.945365275 | 427.825  | 63.8825 | 428.2962008 | 10.44538828 | 430.7480663 | 3.553566312 | 374.6243834 | 9.597508424 |
| 028-40  | 125.0270947 | 100.5371811 | 182.4429874 | 0.191140298 | 0.001489462 | 14.04246592 | 0.170255108 | 0.531481627 | 0.00460681  | 0.714916347 | 0.126828675 | 0.002499223 | 1.157913313 | 2753.71  | 12.6525 | 2752.578832 | 11.49289849 | 2747.691541 | 19.39134708 | 2413.485698 | 44.82931029 |
| 028-41  | 47.04158124 | 97.505936   | 94.70865167 | 0.140183719 | 0.001685115 | 6.874536912 | 0.091042492 | 0.355581085 | 0.002680068 | 0.569123496 | 0.091495107 | 0.001679603 | 0.608636345 | 2229.32  | 20.525  | 2095.379376 | 11.74000751 | 1961.193925 | 12.74497901 | 1769.548547 | 31.10278647 |
| 028-42  | 17.14432949 | 210.7396483 | 263.444657  | 0.190548587 | 0.010121764 | 1.228182135 | 0.079764318 | 0.042288693 | 0.000950938 | 0.346243919 | 0.031550007 | 0.001940916 | 0.837262788 | 2746.61  | 87.345  | 813.5107551 | 36.36415482 | 267.0037821 | 5.881425496 | 627.8429876 | 38.03043189 |
| 028-43  | 15.68714078 | 156.9410833 | 182.9276128 | 0.055070529 | 0.001665076 | 0.499856625 | 0.015079299 | 0.06609903  | 0.000581598 | 0.291670298 | 0.019361988 | 0.000356323 | 0.737678446 | 416.715  | 66.66   | 411.6053414 | 10.20882984 | 412.6106038 | 3.516767887 | 387.6084797 | 7.065279687 |
| 028-44  | 42.50540203 | 221.7800254 | 343.4155213 | 0.164723957 | 0.006342902 | 1.782051242 | 0.086608573 | 0.075599069 | 0.000847522 | 0.230671316 | 0.053591194 | 0.002236064 | 0.98331634  | 2504.63  | 64.815  | 1038.928276 | 31.62030315 | 469.8003565 | 5.079472567 | 1055.169556 | 42.89700901 |
| 028-45  | 265.9506448 | 358.5116475 | 815.148305  | 0.137625148 | 0.000908022 | 5.053475056 | 0.094482801 | 0.264161793 | 0.003820538 | 0.773556187 | 0.074459064 | 0.001143339 | 1.446066003 | 2198.15  | 10.955  | 1828.331722 | 15.84941301 | 1511.09936  | 19.4823512  | 1451.588444 | 21.50796634 |
| SRM 610 | 426         | 457.2       | 461.5       | 0.899795635 | 0.003587429 | 28.35687045 | 0.115998517 | 0.228400657 | 0.000927082 | 0.992262253 | 0.491317095 | 0.00226147  | 0.644027442 | error    | error   | 3431.514044 | 4.01212867  | 1326.111485 | 4.865149671 | 8078.012858 | 30.65035106 |
| GJ-Istd | 45.43377002 | 7.848300233 | 454.0403817 | 0.06014     | 0.0009089   | 0.8093      | 0.013235993 | 0.0976      | 0.000711906 | 0.445990676 | 0.0301      | 0.00158485  | 37.2281     | 609.28   | 33.325  | 602.0612582 | 7.428200443 | 600.3286252 | 4.181159775 | 599.4115191 | 31.09734627 |
| GJ-1    | 53.13079386 | 8.99934268  | 481.3800734 | 0.060308089 | 0.000788663 | 0.898735255 | 0.013336045 | 0.108051939 | 0.000881697 | 0.549910104 | 0.03956832  | 0.002155491 | 34.49479591 | 612.98   | 27.7725 | 651.0514387 | 7.131809002 | 661.4244245 | 5.129531859 | 784.3466432 | 41.90907099 |
| Ple     | 48.57567106 | 83.06719402 | 860.7319798 | 0.054080114 | 0.000767548 | 0.403499331 | 0.006358367 | 0.05405936  | 0.000363344 | 0.42652465  | 0.017672902 | 0.000434434 | 6.648790199 | 375.98   | 31.4775 | 344.1830127 | 4.600089258 | 339.395     |             |             |             |

|         |             |             |             |             |             |             |             |             |             |             |             |             |             |          |         |             |             |             |             |             |             |
|---------|-------------|-------------|-------------|-------------|-------------|-------------|-------------|-------------|-------------|-------------|-------------|-------------|-------------|----------|---------|-------------|-------------|-------------|-------------|-------------|-------------|
| Ple     | 38.26681973 | 59.64739022 | 643.7087401 | 0.051615772 | 0.000903217 | 0.379084334 | 0.00701746  | 0.053254453 | 0.000419278 | 0.42530663  | 0.015347709 | 0.000697888 | 6.631651511 | 333.39   | 40.7375 | 326.3641699 | 5.16681362  | 334.4712316 | 2.566180088 | 307.8549632 | 13.89264365 |
| 91500   | 14.82268533 | 23.60703866 | 68.77529106 | 0.073538574 | 0.001551594 | 1.790507171 | 0.036971277 | 0.177185973 | 0.001635921 | 0.447141213 | 0.048212855 | 0.002008411 | 1.796231837 | 1028.7   | 42.5925 | 1042.00981  | 13.45354189 | 1051.583058 | 8.958511079 | 951.7265552 | 38.72734564 |
| 028-46  | 102.9404297 | 45.23503829 | 255.5873024 | 0.113222052 | 0.001199702 | 5.195787656 | 0.059776278 | 0.332780205 | 0.002214045 | 0.578297636 | 0.086665269 | 0.003140512 | 3.534974794 | 1851.55  | 19.9075 | 1851.926335 | 9.796608038 | 1851.842969 | 10.70893914 | 1679.911473 | 58.41442095 |
| 028-47  | 32.5182611  | 795.2566632 | 608.7222098 | 0.077150793 | 0.001523016 | 0.368956145 | 0.007923434 | 0.034625538 | 0.000267163 | 0.359286826 | 0.009677058 | 0.000320837 | 0.462596539 | 1125     | 38.89   | 318.8795362 | 5.877039987 | 219.433117  | 1.664606238 | 194.6545793 | 6.422676628 |
| 028-48  | 7.566033234 | 111.8152478 | 172.4059525 | 0.054056187 | 0.002028703 | 0.250613785 | 0.009486314 | 0.033697178 | 0.000381014 | 0.29871328  | 0.009741761 | 0.000367172 | 0.951937697 | 372.275  | 85.175  | 227.0746395 | 7.702159528 | 213.6462136 | 2.376104223 | 195.9497888 | 7.349760891 |
| 028-49  | 88.68681282 | 138.1130166 | 237.1283095 | 0.099565966 | 0.00112138  | 3.874469956 | 0.050055092 | 0.281866691 | 0.001983628 | 0.544728961 | 0.073377939 | 0.002241162 | 1.05877303  | 1616.665 | 20.985  | 1608.378303 | 10.42716008 | 1600.756604 | 9.975527647 | 1431.24059  | 42.20223137 |
| 028-50  | 34.45919673 | 317.7596462 | 361.3273853 | 0.05672423  | 0.001104544 | 0.536420557 | 0.010626535 | 0.068585759 | 0.000482896 | 0.355413132 | 0.019103137 | 0.000583499 | 0.700635217 | 479.67   | 42.5875 | 436.0617324 | 7.022930928 | 427.6296757 | 2.913147865 | 382.4752416 | 11.57273259 |
| 028-51  | 156.0101349 | 236.9947043 | 378.5950574 | 0.109635479 | 0.001087738 | 4.639224404 | 0.050967793 | 0.306634685 | 0.002022071 | 0.600239542 | 0.080093124 | 0.002373389 | 0.985131681 | 1794.445 | 18.515  | 1756.355322 | 9.177368855 | 1724.124992 | 9.976097798 | 1557.296877 | 44.4142707  |
| 028-52  | 20.41772791 | 161.4978252 | 220.4657096 | 0.058798664 | 0.001397512 | 0.559610117 | 0.013478528 | 0.069123375 | 0.00054005  | 0.324378612 | 0.019047494 | 0.000610235 | 0.838651555 | 561.145  | 51.8425 | 451.2726456 | 8.7754045   | 430.8721145 | 3.256300448 | 381.3716339 | 12.10366162 |
| 028-53  | 5.882652707 | 36.72518809 | 64.01864141 | 0.055725535 | 0.002467351 | 0.54442652  | 0.023690964 | 0.072059066 | 0.000964409 | 0.307559603 | 0.018668326 | 0.000772013 | 1.075240172 | 442.64   | 130.54  | 441.3389417 | 15.57684345 | 448.5489792 | 5.799105189 | 373.8496482 | 15.31814127 |
| 028-54  | 168.7231096 | 168.9637988 | 313.5778235 | 0.145017622 | 0.001441297 | 8.115757974 | 0.104644072 | 0.404936527 | 0.003397596 | 0.650727595 | 0.104933879 | 0.003572136 | 1.175552025 | 2287.965 | 16.51   | 2244.001179 | 11.65657158 | 2191.730059 | 15.58956766 | 2016.887215 | 65.34425859 |
| 028-55  | 89.93522709 | 128.2152582 | 176.7582502 | 0.133990834 | 0.001575002 | 6.743712542 | 0.085889297 | 0.364686017 | 0.00270689  | 0.582789244 | 0.091940514 | 0.003239692 | 0.850084638 | 2150.92  | 20.3725 | 2078.368512 | 11.26257116 | 2004.347319 | 12.78664691 | 1777.794885 | 59.96808647 |
| SRM 610 | 426         | 457.2       | 461.5       | 0.913104277 | 0.009564502 | 26.8163409  | 0.276531469 | 0.212762067 | 0.001164671 | 0.530840548 | 0.39895901  | 0.014618934 | 0.621767588 | error    | error   | 3376.781896 | 10.09459222 | 1243.516251 | 6.190789935 | 6785.81901  | 211.2227654 |
| GJ-Istd | 38.131976   | 5.937817209 | 354.9020002 | 0.059789879 | 0.001110958 | 0.800344339 | 0.014295599 | 0.097239055 | 0.000768587 | 0.442514011 | 0.027295802 | 0.001822838 | 37.09719664 | 594.47   | 40.73   | 597.0228423 | 8.062798813 | 598.2083787 | 4.515545887 | 544.313597  | 35.86470223 |
| GJ-Istd | 38.33186837 | 5.848470209 | 351.7693493 | 0.060490121 | 0.001051972 | 0.818255661 | 0.014912715 | 0.097960945 | 0.000729466 | 0.408586808 | 0.032904198 | 0.002244506 | 37.35900336 | 620.39   | 37.03   | 607.0747965 | 8.328013189 | 602.4481747 | 4.282884557 | 654.3596541 | 43.92135086 |
| Ple     | 36.77735129 | 54.78285343 | 602.7040978 | 0.052646091 | 0.001032145 | 0.390096752 | 0.007770374 | 0.053885719 | 0.000601006 | 0.559932478 | 0.015588703 | 0.000692967 | 6.776073287 | 322.28   | 16.665  | 334.4401185 | 5.67585547  | 338.3337171 | 3.676238329 | 312.6517869 | 13.79141125 |
| 91500   | 14.51724727 | 22.87986715 | 65.50762193 | 0.077325904 | 0.001896926 | 1.907780067 | 0.047925241 | 0.178826851 | 0.001564923 | 0.348356675 | 0.049261374 | 0.002036169 | 1.764709029 | 1129.33  | 48.92   | 1083.809643 | 16.73678321 | 1060.562451 | 8.557783711 | 971.9345844 | 39.22337387 |
| 028-56  | 181.2803468 | 265.6697297 | 614.9893862 | 0.127449977 | 0.001271903 | 3.918511632 | 0.040891858 | 0.222568628 | 0.001093396 | 0.470758073 | 0.059037954 | 0.001909735 | 1.418581051 | 2064.81  | 12.5    | 1617.511267 | 8.441955411 | 1295.433222 | 5.765307803 | 1159.391713 | 36.44821188 |
| 028-57  | 224.960022  | 356.8233263 | 735.6869514 | 0.125483359 | 0.001233391 | 3.98077131  | 0.055021411 | 0.229303909 | 0.002096553 | 0.661500065 | 0.058774351 | 0.001819467 | 1.262567771 | 2035.49  | 17.745  | 1630.283556 | 11.21715443 | 1330.849838 | 10.99423984 | 1154.360104 | 34.7340397  |
| 028-58  | 133.9481376 | 221.1488171 | 518.7523793 | 0.111356414 | 0.001331358 | 2.868311611 | 0.032965855 | 0.187217938 | 0.001597626 | 0.742488358 | 0.073402844 | 0.002157196 | 1.466763406 | 1821.91  | 21.6075 | 1373.628609 | 8.653331043 | 1106.286563 | 8.674873269 | 1431.709551 | 40.6201624  |
| 028-59  | 49.69576097 | 119.0163803 | 126.282836  | 0.099364291 | 0.001573324 | 3.773530522 | 0.062455158 | 0.275480687 | 0.002212198 | 0.485190712 | 0.072307383 | 0.002073514 | 0.664294303 | 1612.96  | 29.6275 | 1587.131221 | 13.28566515 | 1568.561592 | 11.1806959  | 1411.07143  | 39.08429891 |
| 028-60  | 13.43884814 | 31.44627645 | 29.42226004 | 0.106159761 | 0.002647258 | 4.495064396 | 0.114392387 | 0.30859671  | 0.003505552 | 0.446379126 | 0.078016252 | 0.002443029 | 0.5752869   | 1800     | 45.6775 | 1730.060727 | 21.14058457 | 1733.797578 | 17.26910349 | 1518.394111 | 45.8055586  |
| 028-61  | 36.34310423 | 67.56604365 | 86.47969048 | 0.10981956  | 0.001567377 | 4.527186165 | 0.067579151 | 0.298890402 | 0.002150952 | 0.482096943 | 0.077102458 | 0.002145412 | 0.785414638 | 1798.15  | 25.925  | 1735.978936 | 12.4153851  | 1685.804113 | 10.6752197  | 1501.253685 | 40.25950321 |
| 028-62  | 66.04362064 | 144.1990511 | 185.1317647 | 0.096640746 | 0.001202149 | 3.429579945 | 0.05067201  | 0.256930023 | 0.002225583 | 0.58627539  | 0.067683637 | 0.001893829 | 0.784072731 | 1561.115 | 23.4575 | 1511.19943  | 11.61594221 | 1474.11609  | 11.41435249 | 1323.728688 | 35.85195386 |
| 028-63  | 156.1958037 | 166.8401457 | 969.2736198 | 0.105978612 | 0.001116914 | 1.856843788 | 0.021304153 | 0.126868551 | 0.000745751 | 0.512331314 | 0.065322072 | 0.00239198  | 3.705288202 | 1731.48  | 14.0425 | 1065.865304 | 7.572089616 | 769.9764201 | 4.266176312 | 1278.97258  | 45.38282942 |
| 028-64  | 62.34246809 | 461.01175   | 671.4344981 | 0.060321815 | 0.001118658 | 0.583263914 | 0.011827393 | 0.069916553 | 0.000510806 | 0.360289595 | 0.019019953 | 0.00056473  | 0.869556644 | 616.685  | 38.88   | 466.5568203 | 7.585316265 | 435.6529065 | 3.077683577 | 380.8253708 | 11.20139677 |
| 028-65  | 33.36789854 | 614.5397459 | 684.9855652 | 0.049619444 | 0.001172042 | 0.231792656 | 0.005442056 | 0.033922924 | 0.000265597 | 0.333477687 | 0.009654355 | 0.000309873 | 0.735677139 | 176.01   | 55.545  | 211.6774655 | 4.485988655 | 215.0538679 | 1.655973863 | 194.200094  | 6.203333172 |
| SRM 610 | 426         | 457.2       | 461.5       | 0.904447861 | 0.009638387 | 26.33284189 | 0.293039173 | 0.210991475 | 0.001388572 | 0.591392112 | 0.406099988 | 0.01319258  | 0.614444565 | error    | error   | 3358.977488 | 10.88647908 | 1234.097826 | 7.3917232   | 6888.729786 | 189.64459   |
| GJ-Istd | 39.64410094 | 5.977032674 | 362.9420363 | 0.061024593 | 0.001092824 | 0.82344561  | 0.014974143 | 0.097935758 | 0.000835422 | 0.469091274 | 0.030858073 | 0.001711767 | 37.38087961 | 638.905  | 34.255  | 609.9689328 | 8.338517403 | 602.3002964 | 4.905090964 | 614.2806635 | 33.56296865 |
| GJ-Istd | 39.32690324 | 6.014980289 | 363.6936655 | 0.059255407 | 0.001125116 | 0.79515439  | 0.016078105 | 0.097264242 | 0.000910816 | 0.463120678 | 0.029341927 | 0.001865064 | 37.07532039 | 575.96   | 8.33    | 594.091516  | 9.094410971 | 598.3563508 | 5.351035758 | 584.5314281 | 36.62257373 |
| Ple     | 38.69294984 | 58.09034656 | 636.7668798 | 0.053160862 | 0.001014716 | 0.392181256 | 0.007463558 | 0.053567158 | 0.000424978 | 0.416878228 | 0.014982069 | 0.000615492 | 6.667887533 | 344.5    | 44.44   | 335.9615843 | 5.443574611 | 336.3848494 | 2.600296565 | 300.5749652 | 12.25683107 |
| 91500   | 14.97621943 | 23.15501641 | 67.98680317 | 0.073121089 | 0.001727189 | 1.803099388 | 0.043956901 | 0.17913927  | 0.001690717 | 0.387144226 | 0.049026036 | 0.001850561 | 1.790328277 | 1016.665 | 48.1525 | 1046.581438 | 15.9240703  | 1062.270683 | 9.243243375 | 967.400695  | 35.65592268 |
| 028-66  | 65.34550222 | 2384.036239 | 1961.157783 | 0.17310329  | 0.009542309 | 0           | 0           | 0           | 0           | #DIV/0!     | 0           | 0           | 0           | 2587.965 | 91.205  | 0           | 0           | 0           | 0           | 0           | 0           |
| 028-67  | 105.7665659 | 59.35921188 | 208.0673388 | 0.148731626 | 0.001512758 | 8.043927009 | 0.090776868 | 0.391704429 | 0.00246662  | 0.558003301 | 0.103877093 | 0.002977593 | 2.151275758 | 2331.18  | 18.0575 | 2235.968405 | 10.19207571 | 2130.728149 | 11.42546735 | 1997.546491 | 54.52051253 |
| 028-68  | 213.5485285 | 309.7639301 | 324.6277325 | 0.163024749 | 0.001497936 | 9.984406876 | 0.111793757 | 0.44377825  | 0.003527797 | 0.709973761 | 0.11586423  | 0.00318692  | 0.661860587 | 2487.345 | 15.4325 | 2433.341839 | 10.33441377 | 2367.532393 | 15.75150903 | 2215.850415 | 57.72649634 |
| 028-69  | 26.13775882 | 234.3138315 | 269.0740772 | 0.059167961 | 0.001386158 | 0.563179284 | 0.013481493 | 0.06902521  | 0.000538024 | 0.325613487 | 0.020317016 | 0.000584689 | 0.699485221 | 572.255  | 56.47   | 453.5936946 | 8.757293128 | 430.2801929 | 3.244380233 | 406.536202  | 11.58255422 |
| 028-70  | 10.50630127 | 151.6609957 | 223.5961227 | 0.067204424 | 0.002074586 | 0.316666747 | 0.010179378 | 0.03417262  | 0.000337648 | 0.307373996 | 0.011857334 | 0.000383636 | 0.914410249 | 844.13   | 59.105  | 279.335281  | 7.850258103 | 216.6105131 | 2.104695934 | 238.2533969 | 7.663276438 |
| 028-71  |             |             |             |             |             |             |             |             |             |             |             |             |             |          |         |             |             |             |             |             |             |

|         |             |             |             |             |             |             |             |             |             |             |             |             |             |          |          |             |             |             |             |             |             |
|---------|-------------|-------------|-------------|-------------|-------------|-------------|-------------|-------------|-------------|-------------|-------------|-------------|-------------|----------|----------|-------------|-------------|-------------|-------------|-------------|-------------|
| 028-75  | 247.9029496 | 287.3286121 | 731.3347814 | 0.107270643 | 0.001090701 | 4.030075282 | 0.056230891 | 0.271989572 | 0.002672586 | 0.704235121 | 0.070283856 | 0.002793169 | 1.614108847 | 1753.39  | -13.8875 | 1640.285273 | 11.35137531 | 1550.892938 | 13.54462651 | 1372.893371 | 52.74890774 |
| SRM 610 | 426         | 457.2       | 461.5       | 0.921251166 | 0.009474017 | 27.11469156 | 0.292655006 | 0.213327164 | 0.001273726 | 0.553195366 | 0.434130378 | 0.016465755 | 0.622596053 | error    | error    | 3387.614633 | 10.56983557 | 1246.519311 | 6.76731552  | 7287.693926 | 232.0739021 |
| GJ-Istd | 39.69678205 | 6.070682149 | 364.1824329 | 0.060093946 | 0.001095199 | 0.818830115 | 0.015458487 | 0.098800363 | 0.000739425 | 0.396426264 | 0.031168833 | 0.002210946 | 37.19550977 | 605.575  | 43.51    | 607.3955427 | 8.630087633 | 607.374735  | 4.338040524 | 620.3728705 | 43.33744016 |
| GJ-Istd | 39.08322684 | 6.142988204 | 367.6847182 | 0.060186054 | 0.00101736  | 0.799769885 | 0.013982618 | 0.096399637 | 0.000763231 | 0.452852804 | 0.029031167 | 0.001976638 | 37.26069023 | 609.28   | 41.6575  | 596.6988021 | 7.888785935 | 593.2748054 | 4.487508744 | 578.4284069 | 38.82516034 |
| Ple     | 39.18038904 | 58.09611896 | 635.0906766 | 0.053552984 | 0.001025545 | 0.406042381 | 0.008081707 | 0.055000098 | 0.000446961 | 0.408295454 | 0.016303635 | 0.000729477 | 6.754190259 | 353.76   | 42.5875  | 346.0211561 | 5.836323658 | 345.1465577 | 2.731086527 | 326.8753475 | 14.50783282 |
| 91500   | 15.03726913 | 23.79293633 | 68.63732397 | 0.07871477  | 0.001943138 | 1.926292853 | 0.047784654 | 0.177949742 | 0.001651218 | 0.374059802 | 0.05335414  | 0.002232557 | 1.786739799 | 1164.82  | 48.1475  | 1090.253728 | 16.58208653 | 1055.764195 | 9.036417022 | 1050.62137  | 42.83937156 |
| 028-76  | 115.4736255 | 119.7142515 | 207.0421563 | 0.144630138 | 0.00152379  | 8.337858403 | 0.11256778  | 0.417527439 | 0.003791875 | 0.672681299 | 0.113899298 | 0.004024309 | 1.096972971 | 2283.645 | 18.205   | 2268.443857 | 12.24102449 | 2249.244891 | 17.24414749 | 2180.227197 | 73.02329564 |
| 028-77  | 28.44858375 | 378.2472019 | 634.4276229 | 0.050447591 | 0.001208642 | 0.242357527 | 0.005929018 | 0.034853991 | 0.000264526 | 0.310234453 | 0.010326959 | 0.000347845 | 1.029803904 | 216.74   | 83.32    | 220.3490948 | 4.845843845 | 220.856375  | 1.64781316  | 207.6604392 | 6.958863945 |
| 028-78  | 16.16130472 | 148.0935937 | 164.7227889 | 0.05656048  | 0.001515612 | 0.543358721 | 0.014317924 | 0.069879661 | 0.000647104 | 0.351422578 | 0.020284613 | 0.000689052 | 0.753841882 | 475.97   | 59.255   | 440.636675  | 9.420100559 | 435.4306235 | 3.89903543  | 405.8943039 | 13.6503836  |
| 028-79  | 51.15094326 | 55.43572442 | 95.50243952 | 0.144730223 | 0.001758686 | 7.930361113 | 0.100741871 | 0.397322254 | 0.002828971 | 0.560490946 | 0.103476762 | 0.003226575 | 1.10009722  | 2284.88  | 20.2125  | 2223.137363 | 11.45484785 | 2156.697692 | 13.05120958 | 1990.215017 | 59.10089127 |
| 028-80  | 10.83034381 | 144.0422647 | 248.2908421 | 0.051824141 | 0.001790845 | 0.250213427 | 0.008738555 | 0.035186472 | 0.000399387 | 0.325004608 | 0.010155213 | 0.000360719 | 1.028524321 | 275.99   | 77.765   | 226.7495337 | 7.097288651 | 222.927165  | 2.487103809 | 204.2242596 | 7.217643039 |
| 028-81  | 158.6039396 | 42.57089173 | 790.5578844 | 0.112482797 | 0.001101732 | 2.649653892 | 0.035579453 | 0.170322186 | 0.001473682 | 0.644350807 | 0.072868662 | 0.002639486 | 14.1929387  | 1839.815 | 17.905   | 1314.547737 | 9.898998313 | 1013.886115 | 8.117395554 | 1421.648376 | 49.72649633 |
| 028-82  | 164.3351079 | 138.3612561 | 409.8829491 | 0.134706352 | 0.001319624 | 5.876773003 | 0.065534018 | 0.315995144 | 0.002298277 | 0.652219885 | 0.080366888 | 0.002484619 | 1.862655668 | 2161.11  | 17.285   | 1957.810328 | 9.676652921 | 1770.141132 | 11.25814101 | 1562.419302 | 46.4839944  |
| 028-83  | 91.80692255 | 63.21139027 | 188.4921935 | 0.1415451   | 0.001583893 | 7.455272634 | 0.087069622 | 0.381875934 | 0.002799561 | 0.627717855 | 0.096506912 | 0.003102549 | 1.866346962 | 2245.99  | 18.6775  | 2167.629819 | 10.456451   | 2085.040765 | 13.05989388 | 1862.144365 | 57.19033627 |
| 028-84  | 90.87961982 | 85.404029   | 160.2887739 | 0.151330111 | 0.001672715 | 8.862243908 | 0.111565182 | 0.424016321 | 0.003257017 | 0.610172315 | 0.107782655 | 0.003657931 | 1.173261941 | 2360.805 | 18.825   | 2323.921125 | 11.48686126 | 2278.686698 | 14.7442962  | 2068.931979 | 66.74161631 |
| 028-85  | 26.22911092 | 210.7110201 | 277.1280647 | 0.054211014 | 0.001212064 | 0.533407208 | 0.011834086 | 0.071428702 | 0.000588672 | 0.371471163 | 0.019819088 | 0.000724802 | 0.817912648 | 388.94   | 49.995   | 434.068328  | 7.836385025 | 444.7574091 | 3.541837962 | 396.6699661 | 14.36515633 |
| SRM 610 | 426         | 457.2       | 461.5       | 0.911235086 | 0.009669859 | 27.12481196 | 0.284185518 | 0.215567326 | 0.001232601 | 0.54576358  | 0.412794758 | 0.015403665 | 0.633412658 | error    | error    | 3387.980073 | 10.26022788 | 1258.410331 | 6.536752281 | 6984.736539 | 220.3821441 |
| GJ-Istd | 38.59120087 | 6.127202556 | 361.7114134 | 0.059909642 | 0.001051502 | 0.80622124  | 0.013599601 | 0.097738296 | 0.000791909 | 0.480328651 | 0.029246209 | 0.002137367 | 37.24318093 | 611.13   | 38.88    | 600.3319796 | 7.645279181 | 601.1408117 | 4.65044659  | 582.6518109 | 41.97344446 |
| GJ-Istd | 38.83861757 | 6.18948129  | 364.0806677 | 0.060370358 | 0.001163419 | 0.81237876  | 0.01609027  | 0.097461704 | 0.000748797 | 0.387904907 | 0.030953791 | 0.002044376 | 37.21301907 | 616.685  | 40.73    | 603.7875967 | 9.014791616 | 599.5163364 | 4.398382021 | 616.1573419 | 40.08078901 |
| Ple     | 37.4049265  | 58.73777973 | 631.9679691 | 0.053664102 | 0.000947824 | 0.394155811 | 0.006981734 | 0.053260422 | 0.00041463  | 0.439502115 | 0.014717122 | 0.000668097 | 6.737929205 | 366.72   | 40.7375  | 337.4006993 | 5.084936155 | 334.507767  | 2.537718124 | 295.2981453 | 13.30788162 |
| 91500   | 14.97265356 | 24.6097653  | 69.11446573 | 0.075635666 | 0.00188265  | 1.866169908 | 0.04911088  | 0.178638877 | 0.001706187 | 0.362931035 | 0.048482769 | 0.00188883  | 1.761030741 | 1087.04  | 54.63    | 1069.174607 | 17.39995822 | 1059.534429 | 9.331777392 | 956.9305247 | 36.41213452 |
| 028-86  | 51.97236973 | 79.96763882 | 90.76524428 | 0.137550634 | 0.001890029 | 7.726417951 | 0.122460111 | 0.406491613 | 0.003502483 | 0.543635734 | 0.105108018 | 0.003394128 | 0.722394418 | 2198.15  | 23.765   | 2199.680125 | 14.25007212 | 2198.861474 | 16.05306614 | 2020.072439 | 62.07819157 |
| 028-87  | 164.9009675 | 118.8893657 | 341.3627879 | 0.141350719 | 0.001327079 | 7.311270992 | 0.074268649 | 0.374519097 | 0.002250677 | 0.59159791  | 0.098192997 | 0.002916252 | 1.799531726 | 2243.52  | 16.8225  | 2150.187891 | 9.073598416 | 2050.629637 | 10.55555467 | 1893.200588 | 53.67370523 |
| 028-88  | 22.01240931 | 13.96570947 | 42.33796523 | 0.142805154 | 0.00233194  | 8.094715036 | 0.136117063 | 0.411578377 | 0.003827366 | 0.553014418 | 0.106059412 | 0.00383113  | 1.912022165 | 2261.42  | 33.485   | 2241.654546 | 15.19797815 | 2222.133729 | 17.47890748 | 2037.46579  | 70.01068526 |
| 028-89  | 98.35824351 | 358.1095065 | 391.9114487 | 0.116252775 | 0.004237491 | 2.571901332 | 0.091961001 | 0.162304564 | 0.002310628 | 0.398153002 | 0.063934087 | 0.002402115 | 0.698030302 | 1899.69  | 66.205   | 1292.682175 | 26.14749749 | 969.5711686 | 12.81530504 | 1252.621332 | 45.63457937 |
| 028-90  | 12.15543528 | 157.7499719 | 272.3171994 | 0.05495493  | 0.002309281 | 0.281549683 | 0.012443477 | 0.037561682 | 0.000587056 | 0.353628712 | 0.011251222 | 0.000436616 | 1.000762565 | 409.31   | 89.805   | 251.8861099 | 9.859385711 | 237.7013607 | 3.64740154  | 226.1424505 | 8.726799209 |
| 91500   | 15.02559981 | 24.40317137 | 69.63485604 | 0.079241685 | 0.002254507 | 1.932289643 | 0.05789468  | 0.176745658 | 0.00167988  | 0.31722189  | 0.060351352 | 0.003210043 | 1.782573745 | 1188.89  | 57.405   | 1092.332402 | 20.05017402 | 1049.171387 | 9.202678115 | 1184.443003 | 61.18946074 |
| Ple     | 39.07716413 | 60.14395466 | 640.7346161 | 0.05446901  | 0.000924128 | 0.411771005 | 0.00703559  | 0.054843575 | 0.00040933  | 0.436820844 | 0.016228008 | 0.000716574 | 6.648190026 | 390.79   | 37.0325  | 350.1497165 | 5.060224458 | 344.1900799 | 2.501520405 | 325.371216  | 14.25226644 |
| GJ-Istd | 39.56197442 | 6.282427962 | 374.1086468 | 0.060822651 | 0.001111656 | 0.812750652 | 0.015359047 | 0.096955904 | 0.000753134 | 0.411046614 | 0.028904646 | 0.001994284 | 37.49256724 | 631.5    | 38.8825  | 603.9959271 | 8.603328387 | 596.5446176 | 4.425897782 | 575.9431136 | 39.17659809 |
| GJ-Istd | 39.7301846  | 6.303069571 | 371.0490715 | 0.059457349 | 0.001031414 | 0.805849348 | 0.014528712 | 0.098244096 | 0.000756123 | 0.426887031 | 0.031295354 | 0.002164265 | 36.96363276 | 583.36   | 37.03    | 600.122896  | 8.169300705 | 604.1104129 | 4.438253214 | 622.8527071 | 42.41721479 |
| SRM 610 | 426         | 457.2       | 461.5       | 0.903914967 | 0.021041812 | 26.98671039 | 0.651575617 | 0.216304212 | 0.002299254 | 0.440257857 | 0.450709832 | 0.040248079 | 0.628318408 | error    | error    | 3382.981945 | 23.64402265 | 1262.317013 | 12.18606468 | 7520.019728 | 560.9062345 |
| SRM 610 | 426         | 457.2       | 461.5       | 0.903109024 | 0.027296446 | 26.72026108 | 0.812262483 | 0.214414466 | 0.002274846 | 0.349013565 | 0.368828094 | 0.065609218 | 0.625724581 | error    | error    | 3373.268612 | 29.76139832 | 1252.293569 | 12.07546516 | 6345.72952  | 969.534027  |
| GJ-Istd | 40.95818588 | 6.391016875 | 379.2248633 | 0.060738839 | 0.001470716 | 0.818010983 | 0.020139287 | 0.097635636 | 0.00072024  | 0.299629012 | 0.031911157 | 0.005149923 | 37.0422684  | 631.5    | 52.61    | 606.9381499 | 11.24851662 | 600.5379179 | 4.229969511 | 634.9181457 | 100.8733081 |
| GJ-Istd | 41.01373276 | 6.362879398 | 380.949889  | 0.059541161 | 0.001319154 | 0.800589017 | 0.017615681 | 0.097564364 | 0.000773684 | 0.360398409 | 0.028288843 | 0.002811481 | 37.4139316  | 587.065  | 48.1375  | 597.1608297 | 9.934101729 | 600.1193258 | 4.54414487  | 563.8424086 | 55.26310629 |
| Ple     | 28.02079597 | 41.99437937 | 468.0351944 | 0.052231428 | 0.001180828 | 0.385820939 | 0.008646751 | 0.053681036 | 0.000429108 | 0.356679584 | 0.01190071  | 0.000957123 | 6.924217664 | 294.505  | 51.845   | 331.3120777 | 6.335507328 | 337.0815925 | 2.62527851  | 239.1198284 | 19.11808223 |
| 91500   | 15.00465472 | 24.32031328 | 68.46890164 | 0.076652273 | 0.002249581 | 1.873259131 | 0.054155522 | 0.178086161 | 0.001932511 | 0.375359087 | 0.045388023 | 0.003228886 | 1.755575513 | 1122.225 | 57.8675  | 1071.682968 | 19.14032454 | 1056.51071  | 10.57458991 | 897.1830344 | 62.42963076 |
| 028-91  | 69.22700115 | 100.9962026 | 131.270437  | 0.136639169 | 0.001892853 | 7.103429327 | 0.103708519 | 0.376738505 | 0.002800183 | 0.509096327 | 0.086416256 | 0.005445609 | 0.809348707 | 2184.88  | 24.075   | 2124.473113 | 12.99568589 | 2061.03013  |             |             |             |

|         |             |             |             |             |             |             |             |             |             |             |             |             |             |          |         |             |             |             |             |             |             |
|---------|-------------|-------------|-------------|-------------|-------------|-------------|-------------|-------------|-------------|-------------|-------------|-------------|-------------|----------|---------|-------------|-------------|-------------|-------------|-------------|-------------|
| 028-96  | 11.26317129 | 24.48881278 | 25.95733586 | 0.113405589 | 0.002964474 | 4.805886607 | 0.124757575 | 0.30900646  | 0.003201293 | 0.399084109 | 0.074801231 | 0.00406431  | 0.695129571 | 1854.635 | 47.685  | 1785.929162 | 21.8220297  | 1735.815775 | 15.765316   | 1458.024119 | 76.4319482  |
| 028-97  | 85.89890328 | 166.1214958 | 241.441017  | 0.104345085 | 0.001211826 | 3.713383233 | 0.0458694   | 0.257591764 | 0.001464186 | 0.460162381 | 0.072237404 | 0.003680024 | 0.920343675 | 1702.775 | 21.295  | 1574.255936 | 9.881751407 | 1477.509064 | 7.505421465 | 1409.752332 | 69.37061472 |
| 028-98  | 51.27581715 | 68.51517455 | 128.9085908 | 0.112293728 | 0.001413647 | 4.765788707 | 0.070457096 | 0.307465742 | 0.00288471  | 0.634622599 | 0.077210407 | 0.00409661  | 1.172123088 | 1836.73  | 23.615  | 1778.89217  | 12.40845025 | 1728.22379  | 14.22298699 | 1503.279294 | 76.86708062 |
| 028-99  | 11.3076193  | 19.05957244 | 28.18845207 | 0.109824546 | 0.002503008 | 4.536072965 | 0.106792463 | 0.300167654 | 0.003634854 | 0.51435442  | 0.074779789 | 0.004300961 | 0.922556987 | 1798.15  | 42.1325 | 1737.610193 | 19.58946545 | 1692.140022 | 18.02216316 | 1457.620887 | 80.88398166 |
| 028-100 | 29.52214395 | 337.9092199 | 299.0942672 | 0.054387117 | 0.001276689 | 0.51635147  | 0.011890883 | 0.069010771 | 0.000529954 | 0.333466583 | 0.018244811 | 0.001045201 | 0.550735014 | 387.09   | 47.2175 | 422.7111749 | 7.962566264 | 430.1931205 | 3.195759326 | 365.444608  | 20.74731997 |
| SRM 610 | 426         | 457.2       | 461.5       | 0.906315193 | 0.009249481 | 27.12476737 | 0.276362694 | 0.216712725 | 0.001181233 | 0.53498049  | 0.409331778 | 0.024546304 | 0.632280951 | error    | error   | 3387.978463 | 9.977790208 | 1264.481767 | 6.258439292 | 6935.1324   | 352.0715866 |
| GJ-Istd | 39.07100586 | 6.211971854 | 366.0427669 | 0.059847744 | 0.001003324 | 0.809795148 | 0.013188413 | 0.098200456 | 0.00076071  | 0.475650581 | 0.033400113 | 0.004133356 | 37.39700092 | 598.17   | 37.0275 | 602.3390981 | 7.399471998 | 603.8542555 | 4.465350711 | 664.0615655 | 80.84456272 |
| GJ-Istd | 38.38013542 | 6.176550714 | 362.8449766 | 0.060432256 | 0.001118422 | 0.808804852 | 0.015135586 | 0.096999544 | 0.000710196 | 0.391248873 | 0.026799887 | 0.002245721 | 37.05919908 | 620.39   | 34.2525 | 601.7833422 | 8.496646947 | 596.8010657 | 4.173400863 | 534.5540219 | 44.20636991 |
| Ple     | 27.3828526  | 40.18535686 | 458.8670384 | 0.052492937 | 0.00111163  | 0.391189416 | 0.008370642 | 0.054044285 | 0.000448417 | 0.387758297 | 0.015515318 | 0.001010165 | 7.153595044 | 305.615  | 48.145  | 335.2379306 | 6.109527736 | 339.3035668 | 2.742470154 | 311.1912257 | 20.10574057 |
| 91500   | 14.80670074 | 23.95993148 | 67.99709555 | 0.076666316 | 0.001970917 | 1.890362003 | 0.047972527 | 0.179485849 | 0.001766839 | 0.387899468 | 0.049605979 | 0.002925356 | 1.778733292 | 1122.225 | 51.8525 | 1077.709047 | 16.85427787 | 1064.165175 | 9.656568134 | 978.5717232 | 56.33362223 |
| 028-101 | 18.17204654 | 359.4037592 | 377.937891  | 0.050820395 | 0.001301097 | 0.243507245 | 0.005940159 | 0.034934122 | 0.000321585 | 0.377363584 | 0.009835643 | 0.000501023 | 0.647761857 | 231.55   | 63.8775 | 221.2883284 | 4.850460508 | 221.3555187 | 2.003094926 | 197.8289629 | 10.02815525 |
| 028-102 | 95.89313704 | 89.96657677 | 241.622004  | 0.110314467 | 0.00110123  | 4.851304801 | 0.055763207 | 0.31871428  | 0.002574623 | 0.702785873 | 0.083259019 | 0.003789565 | 1.672328193 | 1805.555 | 23.1475 | 1793.841376 | 9.676940712 | 1783.447101 | 12.58582748 | 1616.45493  | 70.7087263  |
| 028-103 | 43.59444781 | 42.29243548 | 81.18494323 | 0.143611004 | 0.001719855 | 8.052454249 | 0.110192435 | 0.406146071 | 0.003174598 | 0.571193159 | 0.101981243 | 0.004287249 | 1.189942901 | 2272.225 | 20.6775 | 2236.925327 | 12.36052181 | 2197.277543 | 14.55382921 | 1962.80322  | 78.63591234 |
| 028-104 | 7.849287856 | 14.90220463 | 18.35620276 | 0.106647975 | 0.003055398 | 4.560162599 | 0.123779252 | 0.312616533 | 0.00351546  | 0.414288293 | 0.079739715 | 0.003279684 | 0.780718722 | 1742.9   | 47.375  | 1742.018939 | 22.60799413 | 1753.569691 | 17.26487753 | 1550.682312 | 61.39436065 |
| 028-105 | 9.780359394 | 18.49633433 | 22.38289748 | 0.113836533 | 0.002767841 | 4.923175427 | 0.120963178 | 0.314887029 | 0.003487468 | 0.450762303 | 0.08529957  | 0.003124997 | 0.748647916 | 1861.425 | 44.2925 | 1806.237188 | 20.73905144 | 1764.710734 | 17.09783097 | 1654.493183 | 58.19897124 |
| 028-106 | 32.32079192 | 33.4298036  | 58.64435679 | 0.144946036 | 0.001723187 | 8.290500608 | 0.106238728 | 0.415216923 | 0.003477674 | 0.653599418 | 0.112302752 | 0.003418688 | 1.104456585 | 2287.35  | 21.45   | 2263.281148 | 11.61161398 | 2238.72891  | 15.8410833  | 2151.236337 | 62.12293542 |
| 028-107 | 83.35516215 | 241.5263857 | 395.7342832 | 0.072971739 | 0.00073335  | 1.662126379 | 0.019196838 | 0.165106381 | 0.001120741 | 0.587727192 | 0.0455544   | 0.001090123 | 1.215875265 | 1012.96  | 20.3725 | 994.1871289 | 7.322147265 | 985.0920008 | 6.2009474   | 900.3996235 | 21.07381253 |
| 028-108 | 22.58560818 | 270.4465217 | 552.8357395 | 0.056186484 | 0.001917201 | 0.254051563 | 0.008962094 | 0.032862954 | 0.000294241 | 0.253809808 | 0.009676023 | 0.00023837  | 1.24636839  | 461.155  | 108.32  | 229.8619689 | 7.256570367 | 208.4416626 | 1.836445902 | 194.6338628 | 4.771817629 |
| 028-109 | 78.4253432  | 53.49713198 | 173.9339064 | 0.142620558 | 0.001174827 | 7.013793276 | 0.07355977  | 0.356485594 | 0.002585776 | 0.691610476 | 0.101123846 | 0.00188149  | 2.00163027  | 2261.115 | 8.795   | 2113.178877 | 9.320609941 | 1965.493848 | 12.28837601 | 1947.070979 | 34.53666116 |
| 028-110 | 18.43285413 | 256.2634788 | 415.1827145 | 0.052742943 | 0.00127836  | 0.25108857  | 0.006323239 | 0.034571211 | 0.000315604 | 0.36250555  | 0.010290179 | 0.000184742 | 0.990679937 | 316.725  | 55.55   | 227.4600478 | 5.131982458 | 219.0946109 | 1.966526234 | 206.9246272 | 3.696020466 |
| SRM 610 | 426         | 457.2       | 461.5       | 0.937411014 | 0.003749928 | 27.66866896 | 0.096011867 | 0.214084145 | 0.000724889 | 0.975776468 | 0.427273681 | 0.002368055 | 0.615879939 | error    | error   | 3407.427377 | 3.400548091 | 1250.539905 | 3.848938434 | 7190.825827 | 33.53506893 |
| GJ-Istd | 39.21999172 | 6.06981995  | 366.7670095 | 0.06014     | 0.000882547 | 0.8093      | 0.012696688 | 0.0976      | 0.000661458 | 0.431988024 | 0.0301      | 0.001666685 | 37.2281     | 609.28   | 31.4725 | 602.0612582 | 7.125525538 | 600.3286252 | 3.884870873 | 599.4115191 | 32.70308016 |
| SRM 610 | 426         | 457.2       | 461.5       | 0.905210578 | 0.019850993 | 27.14015513 | 0.610516716 | 0.217240831 | 0.002212847 | 0.452819106 | 0.445185204 | 0.037942917 | 0.627414445 | error    | error   | 3388.533852 | 22.03277184 | 1267.279186 | 11.7190823  | 7442.900089 | 530.7881563 |
| GJ-Istd | 40.07688127 | 6.407079671 | 378.4299846 | 0.060496834 | 0.000943278 | 0.813330682 | 0.013012771 | 0.097595303 | 0.000817709 | 0.523681405 | 0.032474487 | 0.002020154 | 36.97907314 | 620.39   | 33.3275 | 604.3207699 | 7.286687518 | 600.3010404 | 4.802581577 | 645.9491845 | 39.54758724 |
| GJ-Istd | 39.78205158 | 6.278199124 | 373.9462725 | 0.059783166 | 0.001065893 | 0.805269318 | 0.014799001 | 0.097604697 | 0.000655718 | 0.36555676  | 0.027725513 | 0.001956135 | 37.47712686 | 594.47   | 34.25   | 599.7967072 | 8.323961211 | 600.3562099 | 3.851138106 | 552.7664557 | 38.47125872 |
| Ple     | 29.29984618 | 43.68460082 | 496.2588638 | 0.052590429 | 0.001031901 | 0.389141201 | 0.008083504 | 0.053648331 | 0.00044703  | 0.401132698 | 0.016204877 | 0.000760063 | 7.079629541 | 309.32   | 44.44   | 333.7419051 | 5.908647124 | 336.8814971 | 2.735012046 | 324.9111504 | 15.11759132 |
| 91500   | 15.63211828 | 25.53793209 | 72.43276915 | 0.076442961 | 0.001785243 | 1.878183066 | 0.044414393 | 0.178349241 | 0.001557986 | 0.369408059 | 0.05079574  | 0.002042243 | 1.769767824 | 1106.48  | 46.2975 | 1073.421552 | 15.67002543 | 1057.950107 | 8.523301875 | 1001.469936 | 39.28293417 |
| 028-111 | 23.5867507  | 228.0710324 | 247.7815131 | 0.056402979 | 0.001460602 | 0.531559002 | 0.013502087 | 0.068597593 | 0.000671882 | 0.38559767  | 0.020198797 | 0.000708994 | 0.699388539 | 477.82   | 57.4    | 432.8437549 | 8.951758248 | 427.7010656 | 4.053188348 | 404.1941896 | 14.04662147 |
| 028-112 | 30.67538556 | 335.634898  | 308.9811424 | 0.056547855 | 0.001077897 | 0.544919362 | 0.010971485 | 0.069874457 | 0.000585006 | 0.415822888 | 0.019841176 | 0.000647139 | 0.570261122 | 472.265  | 42.5875 | 441.6629094 | 7.211021738 | 435.3992694 | 3.524888916 | 397.1077358 | 12.82564083 |
| 028-113 | 18.73222211 | 149.3124435 | 206.8858933 | 0.056020746 | 0.001566515 | 0.53442076  | 0.015017951 | 0.069374081 | 0.000622055 | 0.319083308 | 0.019568076 | 0.00066505  | 0.8630162   | 453.75   | 65.735  | 434.7392547 | 9.938251491 | 432.3836026 | 3.74987922  | 391.6944416 | 13.18415017 |
| 028-114 | 59.929751   | 935.990347  | 1460.057923 | 0.062430734 | 0.000986559 | 0.284676732 | 0.004421131 | 0.03324395  | 0.000346643 | 0.671411465 | 0.008224778 | 0.000289811 | 1.021373528 | 688.59   | 35.18   | 254.3606807 | 3.494387961 | 210.8191374 | 2.162709066 | 165.5611742 | 5.809950507 |
| 028-115 | 25.96595097 | 224.0554275 | 258.1455554 | 0.066260159 | 0.002046505 | 0.677707005 | 0.025009777 | 0.073277182 | 0.000790716 | 0.292404406 | 0.02288651  | 0.000860479 | 0.742791014 | 814.5    | 64.8125 | 525.3876054 | 15.13755658 | 455.869487  | 4.749270379 | 457.3732639 | 17.00307026 |
| 028-116 | 31.83337541 | 39.53993743 | 81.54973453 | 0.107623085 | 0.001772707 | 4.614307251 | 0.083452246 | 0.311041769 | 0.002900833 | 0.515670758 | 0.081932784 | 0.003050885 | 1.257535871 | 1761.11  | 30.71   | 1751.858868 | 15.09397945 | 1745.831198 | 14.2634678  | 1591.693925 | 56.99553933 |
| 028-117 | 36.17508044 | 949.3688567 | 698.1760581 | 0.050041217 | 0.001062231 | 0.235039306 | 0.005226758 | 0.034063857 | 0.00026761  | 0.35327753  | 0.009669263 | 0.000365172 | 0.457733155 | 198.23   | 54.62   | 214.3502021 | 4.297185726 | 215.9325143 | 1.668294025 | 194.4985305 | 7.31026335  |
| 028-118 | 124.6198782 | 116.1861739 | 243.8596552 | 0.145234652 | 0.001427434 | 7.789674811 | 0.084890635 | 0.38879857  | 0.002635137 | 0.621925032 | 0.098423139 | 0.00396544  | 1.304200605 | 2290.43  | 16.665  | 2207.013977 | 9.806869287 | 2117.254055 | 12.23158153 | 1897.435907 | 72.96889191 |
| 028-119 | 122.355372  | 330.0339304 | 264.9826856 | 0.108640915 | 0.001190738 | 4.635473084 | 0.061969641 | 0.309108554 | 0.00261415  | 0.632607835 | 0.079012364 | 0.003421824 | 0.500751314 | 1776.855 | 15.7425 | 1755.679645 | 11.16595872 | 1736.318534 | 12.87281803 | 1537.062051 | 64.09835752 |
| 028-120 | 21.11240264 | 248.0368864 | 210.7978291 | 0.056304615 | 0.00158231  | 0.533801426 | 0.015184901 | 0.069006539 | 0.000726235 | 0.369959951 | 0.019110624 | 0.000914881 | 0.527994137 | 464.86   | 28.7    | 43          |             |             |             |             |             |

|         |             |             |             |             |             |             |             |             |             |             |             |             |             |          |         |             |             |             |             |             |             |
|---------|-------------|-------------|-------------|-------------|-------------|-------------|-------------|-------------|-------------|-------------|-------------|-------------|-------------|----------|---------|-------------|-------------|-------------|-------------|-------------|-------------|
| 91500   | 15.60168573 | 25.80650398 | 73.96772535 | 0.074467253 | 0.001806093 | 1.804072707 | 0.045989683 | 0.1757338   | 0.001522946 | 0.339956016 | 0.046608481 | 0.002351819 | 1.783707944 | 1053.71  | 48.1475 | 1046.933948 | 16.6548224  | 1043.62587  | 8.350141971 | 920.7664127 | 45.41869416 |
| 028-121 | 143.1044456 | 265.9803595 | 613.5019944 | 0.116797137 | 0.001306897 | 2.930953888 | 0.044885559 | 0.18134124  | 0.001620942 | 0.583677822 | 0.050932884 | 0.002195438 | 1.483909562 | 1909.26  | 20.0625 | 1389.939702 | 11.59464548 | 1074.297739 | 8.845258644 | 1004.10775  | 42.22416858 |
| 028-122 | 86.81412562 | 59.5055197  | 143.0000467 | 0.173744196 | 0.001884636 | 11.07891525 | 0.142361352 | 0.461650294 | 0.003379416 | 0.569683548 | 0.119759985 | 0.004841567 | 1.692553548 | 2594.14  | 18.67   | 2529.787674 | 11.96779638 | 2446.840522 | 14.90449137 | 2286.293339 | 87.39325298 |
| 028-123 | 50.7674523  | 26.29193821 | 71.86484876 | 0.200667684 | 0.002331308 | 15.17466551 | 0.252737568 | 0.546613363 | 0.006118426 | 0.672061178 | 0.134845442 | 0.005241945 | 1.732702964 | 2831.79  | 18.8275 | 2826.264061 | 15.86718019 | 2811.072446 | 25.50224663 | 2556.775484 | 93.36262174 |
| 028-124 | 48.08434307 | 67.43488391 | 91.28298486 | 0.134519622 | 0.00190571  | 7.241693384 | 0.115619868 | 0.390162634 | 0.003484031 | 0.559298904 | 0.101286995 | 0.003670247 | 0.833057594 | 2157.715 | 25.1575 | 2141.651856 | 14.24539248 | 2123.58255  | 16.15606097 | 1950.065506 | 67.3613149  |
| 028-125 | 125.2664562 | 155.3372646 | 232.5875703 | 0.143203827 | 0.001377274 | 7.840737025 | 0.087434248 | 0.39675178  | 0.002889885 | 0.653186158 | 0.104321843 | 0.00356749  | 0.936082714 | 2266.36  | 16.6675 | 2212.895616 | 10.04239215 | 2154.065325 | 13.33767522 | 2005.688327 | 65.29543701 |
| 028-126 | 30.04027544 | 224.6688934 | 335.0922168 | 0.055650999 | 0.001199332 | 0.537330983 | 0.011866553 | 0.07021703  | 0.000685668 | 0.442169592 | 0.021083449 | 0.00075695  | 0.915714006 | 438.935  | 48.145  | 436.6632326 | 7.837828282 | 437.4630738 | 4.130098781 | 421.7133624 | 14.98374004 |
| 028-127 | 23.86888833 | 197.7812006 | 264.8809657 | 0.056266527 | 0.00138007  | 0.527444854 | 0.012981596 | 0.06804776  | 0.000545796 | 0.325885677 | 0.019946706 | 0.000679108 | 0.832859552 | 461.155  | 53.6975 | 430.1125136 | 8.629843479 | 424.383297  | 3.294258762 | 399.1991366 | 13.45785706 |
| 028-128 | 19.67201945 | 379.4615985 | 426.1795675 | 0.05217995  | 0.001407423 | 0.239834013 | 0.006816634 | 0.033299392 | 0.000349195 | 0.368954188 | 0.009982162 | 0.000351804 | 0.697873942 | 300.06   | 61.105  | 218.2845211 | 5.582653654 | 211.1650353 | 2.178512067 | 200.761388  | 7.040463424 |
| 028-129 | 59.46546425 | 46.78522532 | 109.4667205 | 0.150961667 | 0.001880398 | 8.755654658 | 0.121536171 | 0.420578333 | 0.003655018 | 0.62607399  | 0.112580217 | 0.004060578 | 1.457297388 | 2357.1   | 26.695  | 2312.887325 | 12.65031998 | 2263.104368 | 16.58606866 | 2156.27767  | 73.7687957  |
| 028-130 | 268.564161  | 301.0037609 | 477.9143783 | 0.153455798 | 0.001613786 | 8.724848962 | 0.106992055 | 0.411663828 | 0.003061557 | 0.60646544  | 0.11282133  | 0.004060009 | 0.985159203 | 2384.88  | 17.1275 | 2309.675949 | 11.17161853 | 2222.523955 | 13.98073409 | 2160.657487 | 73.7424716  |
| SRM 610 | 426         | 457.2       | 461.5       | 0.918104796 | 0.010155419 | 27.43524304 | 0.30712301  | 0.216499836 | 0.001237603 | 0.510646537 | 0.454757259 | 0.017035762 | 0.628034882 | error    | error   | 3399.126088 | 10.96736281 | 1263.353738 | 6.558247579 | 7576.332577 | 236.7037156 |
| GJ-Istd | 40.15501758 | 6.293591926 | 379.1637638 | 0.059406082 | 0.001064031 | 0.800878207 | 0.015210592 | 0.097664781 | 0.000832343 | 0.448729421 | 0.02989801  | 0.002025364 | 37.84511176 | 583.36   | 38.88   | 597.3238955 | 8.576340478 | 600.709086  | 4.888219811 | 595.4477623 | 39.74877197 |
| GJ-Istd | 39.94710492 | 6.402039475 | 374.9314996 | 0.060873918 | 0.001250014 | 0.817721793 | 0.016540013 | 0.097535219 | 0.000744941 | 0.377598192 | 0.03030199  | 0.002115364 | 36.61108824 | 635.2    | 44.435  | 606.7766209 | 9.239539312 | 599.948142  | 4.375437025 | 603.3744987 | 41.49879281 |
| Ple     | 29.98034881 | 43.20764937 | 492.9996511 | 0.05353274  | 0.001177039 | 0.404788951 | 0.009195221 | 0.05484996  | 0.000463473 | 0.371976043 | 0.017968171 | 0.00084563  | 7.0890153   | 350.055  | 82.4    | 345.1155798 | 6.646411477 | 344.2290961 | 2.832385555 | 359.9525344 | 16.79037311 |
| 91500   | 15.81180473 | 25.8290147  | 72.90154139 | 0.076548782 | 0.002139429 | 1.878639326 | 0.053277235 | 0.178022137 | 0.001487309 | 0.294597434 | 0.054594493 | 0.002248635 | 1.756996905 | 1109.26  | 55.555  | 1073.582501 | 18.79463651 | 1056.160368 | 8.138909612 | 1074.407799 | 43.09712987 |
| 028-131 | 10.51250038 | 22.67689968 | 23.21403959 | 0.116593426 | 0.003394762 | 5.070708273 | 0.154925538 | 0.316223889 | 0.003684066 | 0.381310161 | 0.092403381 | 0.003627726 | 0.632359707 | 1905.555 | 57.56   | 1831.218239 | 25.91838104 | 1771.261544 | 18.04334332 | 1786.360894 | 67.12235571 |
| 028-132 | 12.93325153 | 25.23863926 | 30.54863723 | 0.110232487 | 0.00292847  | 4.646843972 | 0.126347043 | 0.306502133 | 0.002860677 | 0.343264094 | 0.087305292 | 0.003202955 | 0.745284446 | 1803.39  | 48.46   | 1757.726354 | 22.72279208 | 1723.470996 | 14.11489482 | 1691.812561 | 59.54082424 |
| 028-133 | 114.7993046 | 141.9578191 | 241.5955181 | 0.133911199 | 0.00141466  | 6.542788869 | 0.075658925 | 0.354326603 | 0.002571413 | 0.627582517 | 0.10021833  | 0.003143314 | 1.048878674 | 2149.69  | 18.52   | 2051.674864 | 10.18527346 | 1955.22552  | 12.23959866 | 1930.442478 | 57.74631888 |
| 028-134 | 65.93511675 | 97.99845491 | 165.3391897 | 0.10859072  | 0.001344895 | 4.577452683 | 0.064575975 | 0.305352075 | 0.002228327 | 0.517286245 | 0.087244375 | 0.002768    | 1.027859289 | 1775.62  | 22.38   | 1745.171512 | 11.75667179 | 1717.793994 | 11.00448889 | 1690.680118 | 51.45812779 |
| 028-135 | 10.84925774 | 156.9332793 | 248.1085907 | 0.051573454 | 0.001663689 | 0.246489686 | 0.008251332 | 0.034706101 | 0.000368116 | 0.316850021 | 0.010484953 | 0.000381429 | 0.954098983 | 264.88   | 74.0625 | 223.7207189 | 6.721583774 | 219.9350587 | 2.293433114 | 210.8209537 | 7.6295394   |
| 028-136 | 35.57256542 | 379.6275828 | 341.7384587 | 0.068284087 | 0.001727317 | 0.66889547  | 0.019296324 | 0.070446526 | 0.000603385 | 0.296905561 | 0.023907196 | 0.000801433 | 0.551941843 | 877.47   | 47.2225 | 520.0406277 | 11.74071971 | 438.8452863 | 3.633687045 | 477.5319507 | 15.82052821 |
| 028-137 | 107.7528808 | 104.1737817 | 298.036556  | 0.110174138 | 0.001220414 | 4.469296207 | 0.05522673  | 0.294110728 | 0.001983337 | 0.545726977 | 0.084633195 | 0.002901898 | 1.755387925 | 1802.16  | 25      | 1725.288058 | 10.25327379 | 1662.038758 | 9.879696081 | 1642.079044 | 54.07724173 |
| 028-138 | 47.87376879 | 34.81185647 | 93.259398   | 0.143525971 | 0.00238421  | 8.23407544  | 0.170325939 | 0.415872372 | 0.004419682 | 0.513765581 | 0.129439085 | 0.005303424 | 1.748469919 | 2270.06  | 27.9325 | 2257.095491 | 18.73124072 | 2241.713834 | 20.12271307 | 2460.255171 | 94.9097778  |
| 028-139 | 15.93096278 | 30.0788563  | 37.93368205 | 0.108943627 | 0.002640123 | 4.608207504 | 0.108956427 | 0.308511861 | 0.003238587 | 0.443979436 | 0.091290532 | 0.003754279 | 0.767758499 | 1783.335 | 44.445  | 1750.75509  | 19.72937555 | 1733.37958  | 15.95500612 | 1765.759879 | 69.53478117 |
| 028-140 | 157.159456  | 194.660913  | 320.124973  | 0.139308205 | 0.001533195 | 7.054124641 | 0.085396773 | 0.367225912 | 0.00240095  | 0.540071813 | 0.099155497 | 0.003974533 | 1.001769284 | 2220.37  | 19.6    | 2118.276223 | 10.76636998 | 2016.333958 | 11.32039373 | 1910.907623 | 73.0874877  |
| SRM 610 | 426         | 457.2       | 461.5       | 0.884877802 | 0.009558371 | 26.47933899 | 0.296117586 | 0.217031187 | 0.001147135 | 0.472645114 | 0.461074052 | 0.019502868 | 0.611935705 | error    | error   | 3364.405151 | 10.94219982 | 1266.168831 | 6.076185254 | 7663.907371 | 269.8151013 |
| GJ-Istd | 40.11836177 | 6.184366808 | 379.9370817 | 0.060323405 | 0.001140005 | 0.811298927 | 0.015962403 | 0.097577166 | 0.000735899 | 0.383312382 | 0.033008085 | 0.002491962 | 37.67625906 | 616.685  | 41.5025 | 603.1824409 | 8.948480501 | 600.1945145 | 4.32216782  | 656.3924642 | 48.75877116 |
| GJ-Istd | 39.94229439 | 6.274588798 | 378.0319771 | 0.059956595 | 0.001111533 | 0.807301073 | 0.015866626 | 0.097622834 | 0.000745158 | 0.388371969 | 0.027191915 | 0.00221328  | 36.77994094 | 611.13   | 40.7325 | 600.9388362 | 8.914462002 | 600.4627332 | 4.376364376 | 542.2694829 | 43.5511565  |
| Ple     | 29.76658792 | 43.13351557 | 497.091523  | 0.05255195  | 0.000997898 | 0.395004105 | 0.007572237 | 0.054640775 | 0.000453371 | 0.432826873 | 0.017232122 | 0.000913302 | 6.992211669 | 309.32   | 44.44   | 338.0183358 | 5.511665691 | 342.9505953 | 2.771196414 | 345.3326567 | 18.14715803 |
| 91500   | 14.80087983 | 23.77952516 | 68.23374261 | 0.075455071 | 0.001866127 | 1.866183992 | 0.047572118 | 0.180029795 | 0.001852616 | 0.403685364 | 0.054056647 | 0.00243316  | 1.741295534 | 1080.555 | 48.9225 | 1069.179597 | 16.85459093 | 1067.137391 | 10.12071059 | 1064.096893 | 46.65753314 |
| 028-141 | 17.47949195 | 203.9283185 | 419.4563397 | 0.048965031 | 0.001494294 | 0.230669143 | 0.007223059 | 0.034334516 | 0.000349595 | 0.325164233 | 0.010538945 | 0.00046012  | 1.267286606 | 146.38   | 72.2125 | 210.7509169 | 5.959567958 | 217.6196008 | 2.178826229 | 211.9009182 | 9.203057555 |
| 028-142 | 16.03591847 | 120.8869742 | 176.6891271 | 0.056099762 | 0.001632086 | 0.540644095 | 0.015791494 | 0.070131266 | 0.00072579  | 0.354313152 | 0.02019732  | 0.000817222 | 0.888282734 | 457.45   | 64.81   | 438.8491372 | 10.40796945 | 436.946459  | 4.372118443 | 404.1649277 | 16.19087239 |
| 028-143 | 136.4129275 | 139.7570108 | 526.2674027 | 0.119434234 | 0.001210795 | 3.490036961 | 0.046385288 | 0.211970002 | 0.001981141 | 0.703219327 | 0.057656265 | 0.002161791 | 2.284459195 | 1947.84  | 18.2075 | 1524.96414  | 10.49000511 | 1239.304665 | 10.53761073 | 1133.004338 | 41.31273479 |
| 028-144 | 287.2651373 | 160.6545406 | 606.5624428 | 0.140621502 | 0.001237508 | 7.378561096 | 0.083473568 | 0.38036504  | 0.002741529 | 0.637110885 | 0.103701983 | 0.003592047 | 2.26529203  | 2234.88  | 14.97   | 2158.375583 | 10.11634934 | 2077.988628 | 12.80317686 | 1994.339948 | 65.78183203 |
| 028-145 | 17.14766017 | 123.9465766 | 192.5359077 | 0.057355957 | 0.001505434 | 0.541060208 | 0.014771583 | 0.06855131  | 0.000606636 | 0.324138972 | 0.020826237 | 0.000762291 | 0.939660826 | 505.595  | 52.7725 | 439.1233452 | 9.73308819  | 427.4218518 | 3.659749291 | 416.6212364 | 15.09326717 |
| 028-146 | 138.3261931 | 148.5320014 | 265.1279655 | 0.140220825 | 0.001378385 | 7.56100688  | 0.085323972 | 0.39109795  | 0.002475146 | 0.560820451 | 0.102469576 | 0.00        |             |          |         |             |             |             |             |             |             |

|         |             |             |             |             |             |             |             |             |             |             |             |             |             |          |         |             |             |             |             |             |             |
|---------|-------------|-------------|-------------|-------------|-------------|-------------|-------------|-------------|-------------|-------------|-------------|-------------|-------------|----------|---------|-------------|-------------|-------------|-------------|-------------|-------------|
| 028-151 | 82.95561842 | 64.76275007 | 154.5338248 | 0.150351041 | 0.001710576 | 8.594441802 | 0.115441665 | 0.415139716 | 0.003726264 | 0.668242986 | 0.100599869 | 0.0034106   | 1.474691141 | 2349.695 | 18.9775 | 2295.967865 | 12.21782043 | 2238.377213 | 16.9743631  | 1937.45056  | 62.63496832 |
| 028-152 | 20.34025873 | 36.48045339 | 56.43054954 | 0.106821774 | 0.002245069 | 3.949081087 | 0.089127397 | 0.268253755 | 0.002332528 | 0.385270589 | 0.072250098 | 0.002759378 | 0.944549412 | 1746.29  | 38.2725 | 1623.802529 | 18.28788657 | 1531.932046 | 11.85603234 | 1409.991638 | 52.01519768 |
| 91500   | 15.25556787 | 24.42002565 | 70.7775775  | 0.072478802 | 0.001578661 | 1.765853864 | 0.04035245  | 0.176945245 | 0.00155717  | 0.385107505 | 0.047281296 | 0.001927559 | 1.75408178  | 999.69   | 44.45   | 1032.999339 | 14.81499132 | 1050.264666 | 8.529002134 | 933.7557236 | 37.20137041 |
| Ple     | 24.19078836 | 32.92279576 | 408.9028823 | 0.055039003 | 0.001392102 | 0.401871652 | 0.010522938 | 0.053065847 | 0.000439102 | 0.316009592 | 0.014125558 | 0.000706621 | 7.516771602 | 413.01   | 55.55   | 343.0047603 | 7.621963168 | 333.3167693 | 2.687990486 | 283.5112995 | 14.08344373 |
| GJ-1std | 40.96080926 | 6.300638941 | 382.3230023 | 0.060317904 | 0.00101079  | 0.810583428 | 0.014732597 | 0.097522978 | 0.000753161 | 0.424912372 | 0.029693514 | 0.002274574 | 36.94107771 | 616.685  | 30.55   | 602.7812657 | 8.262286872 | 599.8762434 | 4.423770382 | 591.4340282 | 44.64851622 |
| GJ-1std | 40.47653277 | 6.116519924 | 377.0050327 | 0.059962096 | 0.001026245 | 0.808016572 | 0.015301855 | 0.097677022 | 0.000743959 | 0.40219117  | 0.030506486 | 0.001903422 | 37.51512229 | 611.13   | 37.0275 | 601.3407398 | 8.59373497  | 600.7809754 | 4.369104743 | 607.3858626 | 37.33352887 |
| SRM 610 | 426         | 457.2       | 461.5       | 0.915528388 | 0.020338651 | 27.01058395 | 0.654429134 | 0.214052909 | 0.002236394 | 0.431219574 | 0.378831669 | 0.034116454 | 0.607667185 | error    | error   | 3383.84773  | 23.72735964 | 1250.374047 | 11.87488287 | 6492.90599  | 500.2135803 |

**Table S2.** Detrial zircon LA-ICP-MS U–Pb dating analytical data in the lower part of the Zhiluo Formation sandstone (Sample BX-18) [16]

| Number | Content(×10 <sup>-6</sup> ) |                  | Th/U  | Isotope ratio   |         |                |         |                |         | Age/Ma          |     |                |    |                |    |
|--------|-----------------------------|------------------|-------|-----------------|---------|----------------|---------|----------------|---------|-----------------|-----|----------------|----|----------------|----|
|        | Th <sup>232</sup>           | U <sup>238</sup> |       | 207Pb/<br>206Pb | 1σ      | 207Pb/<br>235U | 1σ      | 206Pb/<br>238U | 1σ      | 207Pb/<br>206Pb | 1σ  | 207Pb/<br>235U | 1σ | 206Pb/<br>238U | 1σ |
| 18-01  | 143                         | 257              | 0.6   | 0.05715         | 0.00241 | 0.54168        | 0.02369 | 0.06925        | 0.00100 | 498             | 60  | 440            | 16 | 432            | 6  |
| 18-02  | 450                         | 652              | 0.7   | 0.05464         | 0.00147 | 0.49567        | 0.01346 | 0.06611        | 0.00080 | 398             | 56  | 409            | 9  | 413            | 5  |
| 18-03  | 133                         | 415              | 0.300 | 0.14245         | 0.00219 | 7.67542        | 0.13277 | 0.38975        | 0.00378 | 2257            | 26  | 2194           | 16 | 2122           | 18 |
| 18-04  | 8                           | 61               | 0.100 | 0.16314         | 0.00370 | 10.13390       | 0.23710 | 0.45357        | 0.00631 | 2489            | 39  | 2447           | 22 | 2411           | 28 |
| 18-05  | 96                          | 131              | 0.700 | 0.11093         | 0.00301 | 4.56650        | 0.14740 | 0.29832        | 0.00625 | 1815            | 50  | 1743           | 27 | 1683           | 31 |
| 18-06  | 203                         | 328              | 0.600 | 0.05738         | 0.00248 | 0.53450        | 0.02450 | 0.06703        | 0.00088 | 506             | 94  | 435            | 16 | 418            | 5  |
| 18-07  | 391                         | 691              | 0.600 | 0.05783         | 0.00174 | 0.54150        | 0.01710 | 0.06796        | 0.00082 | 524             | 65  | 439            | 11 | 424            | 5  |
| 18-08  | 155                         | 270              | 0.600 | 0.05690         | 0.00209 | 0.53310        | 0.01930 | 0.06828        | 0.00080 | 487             | 80  | 434            | 13 | 426            | 5  |
| 18-09  | 610                         | 737              | 0.800 | 0.05610         | 0.00176 | 0.52530        | 0.01770 | 0.06787        | 0.00085 | 457             | 70  | 429            | 12 | 423            | 5  |
| 18-10  | 759                         | 1960             | 0.400 | 0.10526         | 0.00245 | 3.73640        | 0.08970 | 0.25688        | 0.00229 | 1720            | 42  | 1579           | 19 | 1474           | 12 |
| 18-11  | 210                         | 394              | 0.500 | 0.05543         | 0.00229 | 0.51040        | 0.02110 | 0.06700        | 0.00080 | 428             | 88  | 419            | 14 | 418            | 5  |
| 18-12  | 173                         | 282              | 0.600 | 0.05646         | 0.00276 | 0.53730        | 0.02600 | 0.06986        | 0.00092 | 478             | 105 | 437            | 17 | 435            | 6  |
| 18-13  | 369                         | 619              | 0.600 | 0.05526         | 0.00202 | 0.51260        | 0.01910 | 0.06733        | 0.00073 | 433             | 81  | 420            | 13 | 420            | 4  |
| 18-14  | 920                         | 1783             | 0.500 | 0.05479         | 0.00153 | 0.49350        | 0.01390 | 0.06528        | 0.00059 | 467             | 63  | 407            | 9  | 408            | 4  |
| 18-15  | 636                         | 1113             | 0.600 | 0.10522         | 0.00237 | 4.14370        | 0.09540 | 0.28508        | 0.00252 | 1718            | 41  | 1663           | 19 | 1617           | 13 |
| 18-16  | 550                         | 848              | 0.600 | 0.05812         | 0.00253 | 0.61270        | 0.03010 | 0.07608        | 0.00134 | 600             | 96  | 485            | 19 | 473            | 8  |
| 18-17  | 285                         | 871              | 0.300 | 0.06997         | 0.00181 | 1.36090        | 0.03820 | 0.14061        | 0.00199 | 928             | 58  | 872            | 16 | 848            | 11 |
| 18-18  | 537                         | 965              | 0.600 | 0.05834         | 0.00160 | 0.54040        | 0.01510 | 0.06698        | 0.00064 | 543             | 66  | 439            | 10 | 418            | 4  |
| 18-19  | 575                         | 975              | 0.600 | 0.05691         | 0.00151 | 0.53460        | 0.01450 | 0.06796        | 0.00066 | 487             | 59  | 435            | 10 | 424            | 4  |
| 18-20  | 148                         | 296              | 0.500 | 0.14562         | 0.00278 | 7.73830        | 0.15070 | 0.38444        | 0.00337 | 2295            | 33  | 2201           | 18 | 2097           | 16 |
| 18-21  | 96                          | 124              | 0.800 | 0.10939         | 0.00257 | 4.74220        | 0.11610 | 0.31387        | 0.00326 | 1791            | 43  | 1775           | 21 | 1760           | 16 |

|       |      |      |       |         |         |          |         |         |         |      |     |      |    |      |    |
|-------|------|------|-------|---------|---------|----------|---------|---------|---------|------|-----|------|----|------|----|
| 18-22 | 626  | 1014 | 0.600 | 0.05545 | 0.00140 | 0.53790  | 0.01410 | 0.07024 | 0.00072 | 432  | 57  | 437  | 9  | 438  | 4  |
| 18-23 | 486  | 690  | 0.700 | 0.05704 | 0.00159 | 0.55940  | 0.01560 | 0.07117 | 0.00072 | 494  | 61  | 451  | 10 | 443  | 4  |
| 18-24 | 384  | 587  | 0.700 | 0.14116 | 0.00233 | 7.31250  | 0.12860 | 0.37410 | 0.00350 | 2243 | 28  | 2150 | 16 | 2049 | 16 |
| 18-25 | 417  | 715  | 0.600 | 0.05921 | 0.00163 | 0.58830  | 0.01610 | 0.07193 | 0.00063 | 576  | 56  | 470  | 10 | 448  | 4  |
| 18-26 | 1121 | 1578 | 0.700 | 0.05594 | 0.00119 | 0.49770  | 0.01040 | 0.06440 | 0.00053 | 450  | 16  | 410  | 7  | 402  | 3  |
| 18-27 | 523  | 831  | 0.600 | 0.05480 | 0.00149 | 0.49910  | 0.01370 | 0.06610 | 0.00072 | 467  | 61  | 411  | 9  | 413  | 4  |
| 18-28 | 712  | 1123 | 0.600 | 0.05968 | 0.00312 | 0.56520  | 0.02850 | 0.06876 | 0.00075 | 591  | 113 | 455  | 19 | 429  | 5  |
| 18-29 | 795  | 1106 | 0.700 | 0.05514 | 0.00150 | 0.50360  | 0.01390 | 0.06610 | 0.00072 | 417  | 55  | 414  | 9  | 413  | 4  |
| 18-30 | 243  | 414  | 0.600 | 0.13504 | 0.00282 | 6.67120  | 0.14370 | 0.35664 | 0.00358 | 2165 | 42  | 2069 | 19 | 1966 | 17 |
| 18-31 | 752  | 1012 | 0.700 | 0.05624 | 0.00137 | 0.51760  | 0.01290 | 0.06659 | 0.00071 | 461  | 56  | 424  | 9  | 416  | 4  |
| 18-32 | 129  | 242  | 0.500 | 0.05070 | 0.00323 | 0.23260  | 0.01420 | 0.03355 | 0.00058 | 228  | 148 | 212  | 12 | 213  | 4  |
| 18-33 | 388  | 619  | 0.600 | 0.05316 | 0.00165 | 0.50820  | 0.01670 | 0.06894 | 0.00084 | 345  | 70  | 417  | 11 | 430  | 5  |
| 18-34 | 385  | 816  | 0.500 | 0.05528 | 0.00170 | 0.50200  | 0.01530 | 0.06590 | 0.00061 | 433  | 73  | 413  | 10 | 411  | 4  |
| 18-35 | 183  | 352  | 0.500 | 0.05523 | 0.00195 | 0.52110  | 0.01800 | 0.06888 | 0.00092 | 420  | 80  | 426  | 12 | 429  | 6  |
| 18-36 | 416  | 733  | 0.600 | 0.07069 | 0.00164 | 1.56050  | 0.03570 | 0.15997 | 0.00148 | 950  | 46  | 955  | 14 | 957  | 8  |
| 18-37 | 571  | 863  | 0.700 | 0.05408 | 0.00140 | 0.51700  | 0.01400 | 0.06907 | 0.00066 | 376  | 55  | 423  | 9  | 431  | 4  |
| 18-38 | 470  | 724  | 0.600 | 0.13873 | 0.00228 | 7.93470  | 0.14520 | 0.41352 | 0.00408 | 2213 | 28  | 2224 | 17 | 2231 | 19 |
| 18-39 | 171  | 724  | 0.200 | 0.18967 | 0.00287 | 12.53230 | 0.19670 | 0.47796 | 0.00330 | 2739 | 25  | 2645 | 15 | 2518 | 14 |
| 18-40 | 433  | 723  | 0.600 | 0.05366 | 0.00143 | 0.54320  | 0.01520 | 0.07343 | 0.00089 | 367  | 61  | 441  | 10 | 457  | 5  |
| 18-41 | 383  | 514  | 0.700 | 0.06328 | 0.00148 | 1.15500  | 0.02740 | 0.13242 | 0.00116 | 717  | 17  | 780  | 13 | 802  | 7  |
| 18-42 | 164  | 334  | 0.500 | 0.09991 | 0.00212 | 3.67150  | 0.10630 | 0.26339 | 0.00452 | 1633 | 39  | 1565 | 23 | 1507 | 23 |
| 18-43 | 165  | 331  | 0.500 | 0.05118 | 0.00279 | 0.27490  | 0.01490 | 0.03998 | 0.00090 | 250  | 126 | 247  | 12 | 253  | 6  |
| 18-44 | 199  | 166  | 1.200 | 0.05594 | 0.00318 | 0.48520  | 0.02590 | 0.06468 | 0.00148 | 450  | 128 | 402  | 18 | 404  | 9  |
| 18-45 | 475  | 877  | 0.500 | 0.05428 | 0.00135 | 0.51250  | 0.01390 | 0.06862 | 0.00064 | 383  | 57  | 420  | 9  | 428  | 4  |
| 18-46 | 938  | 1185 | 0.800 | 0.14036 | 0.00270 | 7.91900  | 0.18570 | 0.40965 | 0.00386 | 2232 | 33  | 2222 | 21 | 2213 | 18 |
| 18-47 | 1526 | 704  | 2.200 | 0.15724 | 0.00343 | 10.00270 | 0.27100 | 0.46222 | 0.00484 | 2428 | 37  | 2435 | 25 | 2449 | 21 |
| 18-48 | 509  | 1089 | 0.500 | 0.05619 | 0.00165 | 0.55650  | 0.01880 | 0.07201 | 0.00086 | 461  | 65  | 449  | 12 | 448  | 5  |
| 18-49 | 424  | 734  | 0.600 | 0.05772 | 0.00161 | 0.54770  | 0.01650 | 0.06909 | 0.00072 | 520  | 66  | 443  | 11 | 431  | 4  |
| 18-50 | 1478 | 1749 | 0.800 | 0.05411 | 0.00121 | 0.53490  | 0.01420 | 0.07150 | 0.00076 | 376  | 55  | 435  | 9  | 445  | 5  |
| 18-51 | 427  | 738  | 0.600 | 0.06019 | 0.00192 | 0.62760  | 0.02380 | 0.07493 | 0.00084 | 609  | 70  | 495  | 15 | 466  | 5  |
| 18-52 | 756  | 2102 | 0.400 | 0.16317 | 0.00250 | 10.75100 | 0.18900 | 0.47740 | 0.00449 | 2489 | 26  | 2502 | 16 | 2516 | 20 |
| 18-53 | 173  | 784  | 0.200 | 0.11588 | 0.00202 | 5.74700  | 0.12050 | 0.35883 | 0.00439 | 1894 | 31  | 1938 | 18 | 1977 | 21 |
| 18-54 | 324  | 1094 | 0.300 | 0.07228 | 0.00230 | 1.58800  | 0.05400 | 0.15903 | 0.00158 | 994  | 65  | 966  | 21 | 951  | 9  |
| 18-55 | 317  | 536  | 0.600 | 0.05666 | 0.00161 | 0.56300  | 0.01600 | 0.07220 | 0.00075 | 480  | 63  | 453  | 10 | 449  | 5  |
| 18-56 | 289  | 397  | 0.700 | 0.05970 | 0.00190 | 0.59900  | 0.01900 | 0.07367 | 0.00108 | 594  | 69  | 477  | 12 | 458  | 7  |
| 18-57 | 138  | 811  | 0.200 | 0.13325 | 0.00192 | 7.16900  | 0.11800 | 0.38925 | 0.00369 | 2143 | 25  | 2133 | 15 | 2119 | 17 |
| 18-58 | 203  | 1110 | 0.200 | 0.15302 | 0.00231 | 8.89980  | 0.14760 | 0.42039 | 0.00349 | 2380 | 26  | 2328 | 15 | 2262 | 16 |
| 18-59 | 814  | 1278 | 0.600 | 0.05470 | 0.00121 | 0.51437  | 0.01141 | 0.06811 | 0.00054 | 398  | 50  | 421  | 8  | 425  | 3  |
| 18-60 | 502  | 905  | 0.600 | 0.05523 | 0.00165 | 0.55857  | 0.01794 | 0.07306 | 0.00077 | 420  | 67  | 451  | 12 | 455  | 5  |
| 18-61 | 476  | 907  | 0.500 | 0.05505 | 0.00134 | 0.54294  | 0.01344 | 0.07136 | 0.00068 | 413  | 56  | 440  | 9  | 444  | 4  |
| 18-62 | 216  | 356  | 0.600 | 0.05680 | 0.00206 | 0.57124  | 0.02084 | 0.07329 | 0.00095 | 483  | 47  | 459  | 13 | 456  | 6  |

|        |      |       |       |          |         |          |         |         |            |      |    |      |    |      |    |
|--------|------|-------|-------|----------|---------|----------|---------|---------|------------|------|----|------|----|------|----|
| 18-63  | 97   | 143   | 0.700 | 0.11295  | 0.00279 | 5.14929  | 0.12542 | 0.33027 | 0.00361    | 1847 | 44 | 1844 | 21 | 1840 | 18 |
| 18-64  | 497  | 741   | 0.700 | 0.05704  | 0.00178 | 0.54258  | 0.01675 | 0.06861 | 0.00068    | 494  | 64 | 440  | 11 | 428  | 4  |
| 18-65  | 33   | 92    | 0.400 | 0.10575  | 0.00322 | 4.47680  | 0.14780 | 0.30457 | 0.00483    | 1728 | 56 | 1727 | 27 | 1714 | 24 |
| 18-66  | 479  | 634   | 0.800 | 0.05478  | 0.00171 | 0.54094  | 0.01701 | 0.07120 | 0.00072    | 467  | 70 | 439  | 11 | 443  | 4  |
| 18-67  | 707  | 1 005 | 0.700 | 0.056 06 | 0.00142 | 0.553 77 | 0.01374 | 0.07131 | 0.00063    | 454  | 56 | 447  | 9  | 444  | 4  |
| 18-68  | 118  | 203   | 0.600 | 0.14711  | 8.57782 | 0.17197  | 0.42052 | 0.00443 | 2313.00000 | 2313 | 33 | 2294 | 18 | 2263 | 20 |
| 18-69  | 1154 | 1260  | 0.900 | 0.05843  | 0.00184 | 0.59244  | 0.01886 | 0.07295 | 0.00067    | 546  | 69 | 472  | 12 | 454  | 4  |
| 18-70  | 1386 | 1087  | 1.300 | 0.05735  | 0.00164 | 0.47620  | 0.01360 | 0.06020 | 0.00084    | 506  | 63 | 395  | 9  | 477  | 5  |
| 18-71  | 1198 | 1977  | 0.600 | 0.05464  | 0.00135 | 0.53540  | 0.01310 | 0.07060 | 0.00069    | 398  | 56 | 435  | 9  | 440  | 4  |
| 18-72  | 144  | 580   | 0.200 | 0.05458  | 0.00162 | 0.54040  | 0.01580 | 0.07170 | 0.00073    | 394  | 67 | 439  | 10 | 446  | 4  |
| 18-73  | 480  | 779   | 0.600 | 0.05329  | 0.00127 | 0.53930  | 0.01300 | 0.07302 | 0.00064    | 343  | 54 | 438  | 9  | 454  | 4  |
| 18-74  | 402  | 730   | 0.600 | 0.06961  | 0.00123 | 1.57320  | 0.02930 | 0.16309 | 0.00148    | 917  | 37 | 960  | 12 | 974  | 8  |
| 18-75  | 241  | 495   | 0.500 | 0.05433  | 0.00168 | 0.55230  | 0.01730 | 0.07388 | 0.00076    | 383  | 66 | 447  | 11 | 459  | 5  |
| 18-76  | 777  | 1308  | 0.600 | 0.05505  | 0.00122 | 0.54550  | 0.01230 | 0.07170 | 0.00069    | 413  | 48 | 442  | 8  | 446  | 4  |
| 18-77  | 76   | 87    | 0.900 | 0.10349  | 0.00296 | 3.98290  | 0.11890 | 0.27965 | 0.00334    | 1687 | 52 | 1631 | 24 | 1590 | 17 |
| 18-78  | 1106 | 2010  | 0.500 | 0.05510  | 0.00107 | 0.52970  | 0.01040 | 0.06966 | 0.00056    | 417  | 43 | 432  | 7  | 434  | 3  |
| 18-79  | 280  | 443   | 0.600 | 0.05619  | 0.00162 | 0.57160  | 0.01660 | 0.07395 | 0.00081    | 461  | 65 | 459  | 11 | 460  | 5  |
| 18-80  | 687  | 836   | 0.800 | 0.05482  | 0.00154 | 0.54440  | 0.01580 | 0.07226 | 0.00076    | 406  | 63 | 441  | 10 | 450  | 5  |
| 18-81  | 597  | 736   | 0.800 | 0.05517  | 0.00163 | 0.52160  | 0.01580 | 0.06868 | 0.00066    | 420  | 65 | 426  | 11 | 428  | 4  |
| 18-82  | 868  | 1104  | 0.800 | 0.05479  | 0.00156 | 0.51880  | 0.01580 | 0.06864 | 0.00075    | 467  | 63 | 424  | 11 | 428  | 5  |
| 18-83  | 538  | 753   | 0.700 | 0.05823  | 0.00179 | 0.58110  | 0.01820 | 0.07258 | 0.00074    | 539  | 64 | 465  | 12 | 452  | 4  |
| 18-84  | 626  | 1259  | 0.500 | 0.05436  | 0.00142 | 0.52860  | 0.0143  | 0.07047 | 0.00064    | 387  | 57 | 431  | 9  | 439  | 4  |
| 18-85  | 526  | 928   | 0.600 | 0.05713  | 0.00145 | 0.56580  | 0.01470 | 0.07176 | 0.00063    | 498  | 56 | 455  | 10 | 447  | 4  |
| 18-86  | 332  | 693   | 0.500 | 0.05554  | 0.00166 | 0.52470  | 0.01550 | 0.06855 | 0.00065    | 435  | 67 | 428  | 10 | 427  | 4  |
| 18-87  | 1587 | 1473  | 1.100 | 0.05707  | 0.00126 | 0.55220  | 0.01220 | 0.06989 | 0.00061    | 494  | 44 | 446  | 8  | 436  | 4  |
| 18-88  | 465  | 852   | 0.500 | 0.05560  | 0.00142 | 0.53810  | 0.01420 | 0.06976 | 0.00078    | 435  | 56 | 437  | 9  | 435  | 5  |
| 18-89  | 566  | 702   | 0.800 | 0.05655  | 0.00158 | 0.56510  | 0.01620 | 0.07246 | 0.00091    | 472  | 95 | 455  | 10 | 451  | 5  |
| 18-90  | 537  | 1946  | 0.300 | 0.18608  | 0.00310 | 13.41080 | 0.3036  | 0.51737 | 0.00788    | 2709 | 27 | 2709 | 21 | 2688 | 34 |
| 18-91  | 51   | 93    | 0.500 | 0.10453  | 0.00308 | 4.0395   | 0.13250 | 0.28073 | 0.00547    | 1706 | 55 | 1642 | 27 | 1595 | 28 |
| 18-92  | 236  | 592   | 0.400 | 0.14050  | 0.00229 | 7.57950  | 0.12660 | 0.38983 | 0.00319    | 2235 | 28 | 2182 | 15 | 2122 | 15 |
| 18-93  | 461  | 730   | 0.600 | 0.05572  | 0.00154 | 0.56630  | 0.01610 | 0.07362 | 0.00082    | 443  | 56 | 456  | 10 | 458  | 5  |
| 18-94  | 158  | 481   | 0.300 | 0.14074  | 0.00262 | 7.99770  | 0.16940 | 0.41030 | 0.00462    | 2236 | 31 | 2231 | 19 | 2216 | 21 |
| 18-95  | 773  | 1597  | 0.500 | 0.05256  | 0.00133 | 0.25780  | 0.0066  | 0.03571 | 0.00040    | 309  | 57 | 233  | 5  | 226  | 2  |
| 18-96  | 472  | 874   | 0.500 | 0.05461  | 0.00141 | 0.5428   | 0.01450 | 0.07206 | 0.00075    | 394  | 55 | 440  | 10 | 449  | 5  |
| 18-97  | 434  | 566   | 0.800 | 0.05608  | 0.00198 | 0.5450   | 0.01950 | 0.07063 | 0.00069    | 454  | 78 | 442  | 13 | 440  | 4  |
| 18-98  | 747  | 1211  | 0.600 | 0.05667  | 0.00129 | 0.57533  | 0.01340 | 0.07365 | 0.00080    | 480  | 50 | 461  | 9  | 458  | 5  |
| 18-99  | 911  | 2424  | 0.400 | 0.10411  | 0.00174 | 3.8448   | 0.06720 | 0.26679 | 0.00236    | 1698 | 26 | 1602 | 14 | 1524 | 12 |
| 18-100 | 734  | 1275  | 0.600 | 0.05871  | 0.00141 | 0.61270  | 0.01740 | 0.07475 | 0.00101    | 567  | 54 | 485  | 11 | 465  | 6  |
| 18-101 | 313  | 667   | 0.500 | 0.05566  | 0.00172 | 0.6036   | 0.0201  | 0.07865 | 0.00113    | 439  | 69 | 479  | 13 | 488  | 7  |
| 18-102 | 84   | 195   | 0.400 | 0.13855  | 0.00265 | 7.8469   | 0.15890 | 0.40991 | 0.00456    | 2209 | 33 | 2214 | 18 | 2215 | 21 |
| 18-103 | 173  | 496   | 0.300 | 0.14210  | 0.00234 | 8.08790  | 0.1420  | 0.41108 | 0.00365    | 2254 | 28 | 2241 | 16 | 2220 | 17 |

|        |     |      |       |         |         |         |         |         |         |      |    |      |    |      |    |
|--------|-----|------|-------|---------|---------|---------|---------|---------|---------|------|----|------|----|------|----|
| 18-104 | 98  | 258  | 0.400 | 0.13814 | 0.00251 | 7.93560 | 0.16170 | 0.41529 | 0.00477 | 2206 | 32 | 2224 | 18 | 2239 | 22 |
| 18-105 | 574 | 969  | 0.600 | 0.05609 | 0.00148 | 0.53970 | 0. 0142 | 0.06968 | 0.00064 | 457  | 62 | 438  | 9  | 434  | 4  |
| 18-106 | 288 | 1277 | 0.200 | 0.11318 | 0.00219 | 5.61840 | 0. 1244 | 0.35873 | 0.00440 | 1851 | 35 | 1919 | 19 | 1976 | 21 |
